# Supplementary material for: Mitochondrial and Nuclear DNA Variants in Amyotrophic Lateral Sclerosis: Enrichment in the Mitochondrial Control Region and Sirtuin Pathway Genes in Spinal Cord Tissue
Source: MDPI journal article supplement (doi:10.3390/biom14040411), 2024-03-28

**Table S1.** Statistics related to the Whole Exome Sequencing Dataset

| STATUS                                 | ALS_1    | ALS_2     | ALS_3    | CNTR_1   | CNTR_2   | CNTR_3   | Mean     |
|----------------------------------------|----------|-----------|----------|----------|----------|----------|----------|
| <b>FASTQ FILES</b>                     |          |           |          |          |          |          |          |
| read count r1                          | 21982097 | 74630914  | 24865095 | 26961680 | 22593307 | 26161247 | 32865723 |
| read count r2                          | 21982097 | 74630914  | 24865095 | 26961680 | 22593307 | 26161247 | 32865723 |
| total read count                       | 43964194 | 149261828 | 49730190 | 53923360 | 45186614 | 52322494 | 65731447 |
| <b>SEQUENCING &amp; MAPPING DATA</b>   |          |           |          |          |          |          |          |
| n°Reads                                | 43943978 | 149198658 | 49709380 | 53861791 | 45166169 | 52300071 | 65696675 |
| % mapped reads to Reference Genome     | 99.95    | 99.96     | 98.59    | 99.89    | 99.95    | 99.96    | 99.72    |
| properly paired reads                  | 43797642 | 148096362 | 49549044 | 50696974 | 44953150 | 52040418 | 64855598 |
| % properly paired                      | 99.62    | 99.22     | 99.64    | 94.02    | 99.48    | 99.46    | 98.6     |
| <b>EXOME CAPTURE (62Mbp) n°Reads</b>   |          |           |          |          |          |          |          |
| n°Reads to target region               | 23775956 | 88493265  | 27227554 | 62051995 | 24682054 | 62051995 | 48047137 |
| % mapped reads to target region        | 54.08    | 59.29     | 54.75    | 59.7     | 54.62    | 54.97    | 56.24    |
| mean coverage target region            | 32.74    | 117.99    | 37.43    | 41.12    | 47.21    | 39.44    | 53       |
| % target region covered by 10 reads    | 87       | 93        | 88       | 74       | 87       | 89       | 86       |
| mean mapping quality                   | 57.84    | 57.64     | 57.87    | 57.19    | 57.82    | 57.81    | 58       |
| duplicate reads                        | 611580   | 47483535  | 736284   | 24617761 | 693152   | 822361   | 12494112 |
| % duplicate reads                      | 2.57     | 53.66     | 2.7      | 76.47    | 2.81     | 2.86     | 24       |
| GC Percentage                          | 47.8     | 44.77     | 47.17    | 41.24    | 47.21    | 47.02    | 46       |
| <b>nDNA Variant Calling</b>            |          |           |          |          |          |          |          |
| n.                                     | 228816   | 316724    | 231748   | 212826   | 224905   | 233475   | 241416   |
| Ts/Tv ratio                            | 2.22     | 2.16      | 2.21     | 2.20     | 2.21     | 2.20     | 2.2      |
| <b>nDNA Variant in Mitocarta genes</b> |          |           |          |          |          |          |          |
| n.                                     | 11625    | 14743     | 11697    | 10650    | 11154    | 11986    | 11976    |
| <b>MAPPING DATA to mtDNA</b>           |          |           |          |          |          |          |          |
| *n°Reads                               | 18987    | 17686     | 17005    | 3956     | 29403    | 19844    | 17814    |
| % mapped reads to chrM                 | 100      | 100       | 100      | 100      | 100      | 100      | 100      |
| mean coverage target region            | 115      | 106       | 103      | 20       | 178      | 119      | 107      |
| mean mapping quality                   | 39.32    | 39.84     | 39       | 39.94    | 39.3     | 39.38    | 40       |
| duplicate reads                        | 508      | 6794      | 464      | 7310     | 946      | 431      | 2742     |
| % duplicate reads                      | 3        | 28        | 3        | 65       | 3        | 2        | 17       |
| GC Percentage                          | 44.5     | 44.3      | 44.6     | 44.18    | 44.50    | 44.45    | 44       |
| <b>mtDNA Variant Calling</b>           |          |           |          |          |          |          |          |
| n.variants                             | 13       | 23        | 15       | 28       | 29       | 13       | 20       |
| homoplasmic                            | 13       | 6         | 15       | 25       | 29       | 13       | 17       |
| heteroplasmic                          | 0        | 17        | 0        | 3        | 0        | 0        | 3        |
| median depth                           | 77       | 82        | 68       | 14       | 127      | 76       | 74       |

Statistics were generated with Qualimap (v.2.2.2 ) on recalibrated bam file

**Table S2.** List of 141 Prioritized nDNA variant sites in the WES cohort

| Variant Position | ID           | N° Cases        | GeneName | AF        | SIFT/PolyPhen/FATHMM_score/CLNSIG/Polyphen<br>2 HDIV/Polyphen2<br>HVAR/MutationTaster/Mutatio.ssessor/MetaSVM<br>Score/CADD_PHRED Score | CLNDN                   |
|------------------|--------------|-----------------|----------|-----------|-----------------------------------------------------------------------------------------------------------------------------------------|-------------------------|
| 1:1468408G>A     | rs182168962  | ALS_1           | ATAD3B   | 0.0021374 | deleterious/benign/pathogenic/.0.515/0.117/1/3.04/T/2<br>2.6                                                                            | .                       |
| 1:6635588C>T     | rs996736795  | ALS_2           | DNAJC11  | 0.000138  | ././pathogenic/././././NA/15.79                                                                                                         | .                       |
| 1:6667742TTC>T   | rs374290353  | ALS_2           | DNAJC11  | 1.323E-05 | ././././././NA/27.0                                                                                                                     | .                       |
| 1:7985265A>C     | rs746552212  | ALS_2;<br>ALS_3 | PARK7    | 6.569E-05 | ././pathogenic/././././NA/11.76                                                                                                         | .                       |
| 1:12330118T>C    | rs1286213511 | ALS_3           | VPS13D   | 6.573E-06 | ././benign/././././NA/12.15                                                                                                             | .                       |
| 1:51836567A>C    | .            | ALS_2           | NRDC     | .         | ././benign/././././NA/15.91                                                                                                             | .                       |
| 1:54200218G>A    | rs199576695  | ALS_2;<br>ALS_3 | MRPL37   | 0.0003809 | ././benign/././././NA/19.46                                                                                                             | .                       |
| 1:161121742A>G   | rs998280227  | ALS_3           | NIT1     | 9.198E-05 | ././pathogenic/././././NA/22.1                                                                                                          | .                       |
| 1:212993539A>G   | .            | ALS_2           | ANGEL2   | .         | ././benign/././././NA/15.85                                                                                                             | .                       |
| 1:220791492T>G   | rs771670966  | ALS_2           | MARC1    | .         | tolerated/probably_damaging/pathogenic/.0.876/0.71<br>3/0.918/2.66/T/26.3                                                               | .                       |
| 1:241568656T>A   | rs187112513  | ALS_2           | KMO      | 0.0023641 | ././pathogenic/Benign/./././NA/16.68                                                                                                    | not_provided            |
| 2:37248148A>T    | .            | ALS_2           | NDUFAF7  | .         | deleterious/benign/pathogenic/.0.021/0.028/0.985/2.29<br>5/T/24.5                                                                       | .                       |
| 2:37248187G>T    | .            | ALS_2           | NDUFAF7  | .         | deleterious/probably_damaging/pathogenic/.0.991/0.<br>924/1/3.155/D/27.7                                                                | .                       |
| 2:44313844C>T    | rs201143887  | ALS_2;<br>ALS_3 | PREPL    | 8.541E-05 | tolerated/benign/benign/Uncertain_significance/0.837<br>/0.224/1/0.805/D/14.95                                                          | Cystinuria not_provided |
| 2:74527043G>A    | rs201648655  | ALS_1           | HTRA2    | 0.0003942 | tolerated/benign/benign/.0/0.001/0.946/0.55/T/17.04                                                                                     | .                       |
| 2:96186333C>G    | rs1020052    | ALS_2;<br>ALS_3 | STARD7   | 0.0008544 | ././benign/././././NA/13.46                                                                                                             | .                       |
| 2:111166873G>A   | rs1052112217 | ALS_2;<br>ALS_3 | BCL2L11  | 6.574E-06 | ././benign/././././NA/12.58                                                                                                             | .                       |
| 2:172088063G>C   | .            | ALS_1           | DLX1     | .         | tolerated/benign/pathogenic/.0.018/0.017/1/./T/22.8                                                                                     | .                       |
| 2:197499916T>C   | .            | ALS_2           | HSPD0    | 6.58E-06  | ././benign/././././NA/10.63                                                                                                             | .                       |
| 2:218665409G>T   | .            | ALS_2           | BCS1L    | .         | ././benign/././././NA/10.54                                                                                                             | .                       |

|                        |              |                 |         |           |                                                                                                              |                                                                                                                                       |
|------------------------|--------------|-----------------|---------|-----------|--------------------------------------------------------------------------------------------------------------|---------------------------------------------------------------------------------------------------------------------------------------|
| 3:9751845G>A           | rs56053615   | ALS_2;<br>ALS_3 | OGG1    | 0.0002367 | deleterious/probably_damaging/pathogenic/. /1/1/3.145/D/31                                                   | .                                                                                                                                     |
| 3:42773260C>T          | rs184880436  | ALS_2           | CCDC13  | 0.0032781 | ././pathogenic/. /././NA/14.41                                                                               | .                                                                                                                                     |
| 3:45394306A>C          | .            | ALS_2           | LARS2   | .         | ././benign/. /././NA/13.10                                                                                   | .                                                                                                                                     |
| 3:48593192C>T          | rs147177277  | ALS_1           | COL7A1  | 0.0004275 | tolerated/benign/benign/Conflicting_interpretations_of_pathogenicity/0.428/0.047/0.51/1.655/T/16.83          | Epidermolysis_bullosa_dystrophica not_provided                                                                                        |
| 3:52290966G>C          | rs150662353  | ALS_3           | GLYCTK  | 0.0009    | deleterious/benign/pathogenic/Conflicting_interpretations_of_pathogenicity/0.11/0.011/1/1.89/T/23.2          | D-Glyceric_aciduria not_provided                                                                                                      |
| 3:52536876A>G          | rs202198307  | ALS_2           | NT5DC2  | 0.0007232 | tolerated/benign/pathogenic/. /0.717/0.352/1/. /T/23.1                                                       | .                                                                                                                                     |
| 3:53853161G>A          | rs922324904  | ALS_1           | IL17RB  | 7.884E-05 | ././benign/. /././NA/10.45                                                                                   | .                                                                                                                                     |
| 3:58433800C>T          | rs201470762  | ALS_3           | PDHB    | 9.852E-05 | tolerated/benign/benign/Uncertain_significance/0.435/0.089/1/0/D/16.89                                       | Seizures                                                                                                                              |
| 3:121488236C>A         | rs3218639    | ALS_2           | POLQ    | 0.0047364 | tolerated/probably_damaging/benign/Benign/0.998/0.941/0.969/2.515/T/19.12                                    | not_provided                                                                                                                          |
| 3:131489865A>T         | .            | ALS_2           | MRPL3   | .         | ././benign/. /././NA/13.99                                                                                   | .                                                                                                                                     |
| 3:136328849C>T         | rs142403318  | ALS_1           | PCCB    | 0.0016094 | deleterious/benign/pathogenic/Benign/0.124/0.311/1/3.5/D/24.9                                                | Propionic_acidemia not_provided                                                                                                       |
| 3:158646775G>G<br>CCCT | rs1174797887 | ALS_2           | GFM1    | .         | ././Pathogenic/. /././NA/28.8                                                                                | not_provided                                                                                                                          |
| 3:193625992C>T         | rs184115665  | ALS_2;<br>ALS_3 | OPA1    | 0.0038709 | ././pathogenic/. /././NA/15.02                                                                               | .                                                                                                                                     |
| 4:2064573C>T           | rs931445244  | ALS_2           | NAT8L   | 5.915E-05 | ././benign/. /././NA/10.68                                                                                   | .                                                                                                                                     |
| 4:39461023T>A          | .            | ALS_2           | LIAS    | .         | ././benign/. /././NA/17.80                                                                                   | .                                                                                                                                     |
| 4:48857303C>T          | rs112327139  | ALS_2           | OCIAD1  | 0.003373  | deleterious/benign/pathogenic/. /0.162/0.045/1/0/T/23.3                                                      | .                                                                                                                                     |
| 4:108014444T>G         | rs61735992   | ALS_2;<br>ALS_3 | HADH    | 0.0051491 | deleterious/probably_damaging/pathogenic/Conflicting_interpretations_of_pathogenicity/1/0.989/1/3.415/D/29.0 | Hyperinsulinemic_hypoglycemia,_familial_4 Monogenic_diabetes Deficiency_of_3-hydroxyacyl-CoA_dehydrogenase not_specified not_provided |
| 4:122929020T>A         | .            | ALS_2           | SPATA5  | .         | ././benign/. /././NA/13.84                                                                                   | .                                                                                                                                     |
| 5:195184G>A            | rs190870417  | ALS_2;<br>ALS_3 | CCDC127 | 0.0005914 | tolerated/benign/benign/. /0.006/0.003/1/0.705/T/12.28                                                       | .                                                                                                                                     |

|                     |              |                 |          |           |                                                                                       |                                                                              |
|---------------------|--------------|-----------------|----------|-----------|---------------------------------------------------------------------------------------|------------------------------------------------------------------------------|
| 5:110756712G>A      | rs114859074  | ALS_2;<br>ALS_3 | SLC25A46 | 0.0020151 | tolerated/benign/benign/Likely_benign/0.022/0.026/0.998/1.085/T/16.02                 | Neuropathy,_hereditary_motor_and_sensory,_type_6B not_specified not_provided |
| 5:119542077T>G      | rs181310520  | ALS_1           | HSD17B4  | 0.0019912 | ././benign/Likely_benign/./././NA/11.44                                               | Perrault_syndrome_1 Bifunctional_peroxisomal_enzyme_deficiency               |
| 5:126545018T>C      | rs61757684   | ALS_1           | ALDH7A1  | 0.0039483 | deleterious/probably_damaging/pathogenic/Benign/Likely_benign/0.999/0.991/1/1.01/D/31 | Seizures Pyridoxine-dependent_epilepsy not_specified not_provided            |
| 5:131954186T>C      | rs78943578   | ALS_1           | ACSL6    | 0.0044668 | ././pathogenic/./././NA/12.27                                                         | .                                                                            |
| 5:141929564C>A      | rs201973012  | ALS_1           | DELE1    | 7.228E-05 | ././benign/./././NA/12.93                                                             | .                                                                            |
| 5:145760752T>G      | .            | ALS_2           | PRELID2  | .         | ././benign/./././NA/16.94                                                             | .                                                                            |
| 5:157734595G>A      | rs146534011  | ALS_2           | THG1L    | 0.0005062 | tolerated/benign/pathogenic/./0.009/0.013/0.993/1.015/T/22.3                          | .                                                                            |
| 6:33572563C>T       | rs80065855   | ALS_1           | BAK1     | 0.0058992 | ././pathogenic/./././NA/15.04                                                         | .                                                                            |
| 6:87519363A>G       | .            | ALS_2           | RARS2    | .         | ././benign/./././NA/10.54                                                             | .                                                                            |
| 6:89637797T>A       | rs151021837  | ALS_2;<br>ALS_3 | LYRM2    | 0.0062935 | tolerated/benign/pathogenic/./0.01/0.031/0.988/./T/22.2                               | .                                                                            |
| 6:99400159T>TA      | rs879485823  | ALS_3           | PNISR    | 0.0005636 | ././././././NA/12.20                                                                  | .                                                                            |
| 6:106570848G>T      | .            | ALS_2           | RTN4IP1  | .         | ././benign/./././NA/10.07                                                             | .                                                                            |
| 6:106572113A>G      | rs747032626  | ALS_2           | RTN4IP1  | 1.313E-05 | ././pathogenic/./././NA/22.6                                                          | .                                                                            |
| 6:159806021A>C      | rs146392472  | ALS_2;<br>ALS_3 | PNLDC1   | 0.0045154 | deleterious/benign/benign/./0.328/0.085/1/2.595/T/20.6                                | .                                                                            |
| 8:38408237C>T       | rs150451779  | ALS_2           | LETM2    | 0.0017153 | deleterious/benign/benign/./0.918/0.209/1/1.1/T/18.20                                 | .                                                                            |
| 8:80035750G>A       | rs1412844732 | ALS_2           | TPD52    | 1.315E-05 | ././benign/./././NA/12.40                                                             | .                                                                            |
| 8:86488416A>T       | .            | ALS_2           | RMDN1    | .         | ././benign/./././NA/14.66                                                             | .                                                                            |
| 8:124311581CTAATA>C | rs751594860  | ALS_2           | TMEM65   | 0.0021382 | ././././././NA/10.63                                                                  | .                                                                            |
| 8:124313838A>G      | rs189626815  | ALS_1           | TMEM65   | 0.0050806 | ././pathogenic/./././NA/16.79                                                         | .                                                                            |
| 8:144098948C>T      | rs112552278  | ALS_2           | CYC1     | 0.0048576 | deleterious/probably_damaging/pathogenic/Benign/1/0.999/1/3.055/T/26.0                | not_provided                                                                 |
| 9:5361276T>C        | rs1386251449 | ALS_2;<br>ALS_3 | PLGRKT   | 3.286E-05 | ././benign/./././NA/11.44                                                             | .                                                                            |

|                       |              |                 |           |           |                                                                                     |                                                |
|-----------------------|--------------|-----------------|-----------|-----------|-------------------------------------------------------------------------------------|------------------------------------------------|
| 9:32573056G>A         | rs138358975  | ALS_2;<br>ALS_3 | NDUFB6    | 1.314E-05 | deleterious/probably_damaging/benign/.0.476/0.058/<br>0.991/1.15/T/22.0             | .                                              |
| 9:37440540T>C         | rs149814405  | ALS_1           | GRHPR     | 3.941E-05 | tolerated/benign/benign/.0.069/0.032/0.996/0.21/T/16.<br>75                         | .                                              |
| 9:99915348A>G         | rs748696472  | ALS_2;<br>ALS_3 | STX17     | 3.285E-05 | tolerated/benign/benign/.0.044/0.009/0.563/2.2/T/21.3                               | .                                              |
| 9:104768871G>A        | .            | ALS_1           | NIPSNAP3B | .         | deleterious/possibly_damaging/benign/.0.986/0.886/0<br>.001/2.83/T/25.1             | .                                              |
| 9:122265028C>T        | rs190847701  | ALS_3           | MRRF      | 0.004322  | ././benign/././././NA/15.38                                                         | .                                              |
| 9:128321713G>T        | rs150599940  | ALS_2;<br>ALS_3 | TRUB2     | 0.0005847 | tolerated/benign/benign/.0.611/0.118/1/2.725/T/16.72                                | .                                              |
| 9:133364854C>T        | rs781900544  | ALS_1           | SURF4     | 2.63E-05  | tolerated/benign/benign/.0.003/0.003/0.815/1.355/T/19<br>.83                        | .                                              |
| 9:136418886C>G        | rs1156402838 | ALS_2           | PMPCA     | .         | deleterious/benign/pathogenic/.0.118/0.101/1/1.245/T/<br>21.1                       | .                                              |
| 10:1048948C>A         | .            | ALS_2           | IDI1      | .         | deleterious/benign/benign/.0.061/0.026/1/./T/12.76                                  | .                                              |
| 10:13278305A>A<br>GAT | rs566116760  | ALS_1           | PHYH      | 0.0015965 | ./././Conflicting_interpretations_of_pathogenicity/./././<br>/NA/15.36              | Nonsyndromic_cleft_lip_palat<br>e not_provided |
| 10:49739779A>G        | rs143105288  | ALS_2           | OGDHL     | 0.0062629 | deleterious/probably_damaging/pathogenic/Likely_b<br>enign/0.996/0.954/1/4.385/D/31 | Inborn_genetic_diseases                        |
| 10:73136897T>G        | rs147899211  | ALS_3           | ECD       | 0.0005066 | deleterious/probably_damaging/benign/.1/1/1/2.69/T/<br>25.9                         | .                                              |
| 10:100978532G><br>A   | rs769114862  | ALS_3           | MRPL43    | 9.202E-05 | tolerated/benign/pathogenic/.0.503/0.077/1/0.715/T/21<br>.4                         | .                                              |
| 10:102727138T><br>TA  | rs1212464229 | ALS_2;<br>ALS_3 | SFXN2     | 1.315E-05 | ./././././././NA/32                                                                 | .                                              |
| 10:102727140C><br>G   | rs1017663995 | ALS_2;<br>ALS_3 | SFXN2     | 1.315E-05 | tolerated/benign/pathogenic/.0.001/0.004/1/0.19/T/18.<br>84                         | .                                              |
| 10:133381501C><br>T   | rs150446594  | ALS_2           | PAOX      | 0.0005189 | deleterious/probably_damaging/pathogenic/.1/0.994/<br>1/3.295/D/23.8                | .                                              |
| 11:230474G>T          | rs61748606   | ALS_2;<br>ALS_3 | SIRT3     | 0.0098196 | deleterious/possibly_damaging/benign/Benign/0.971/<br>0.838/1/1.12/T/22.7           | not_provided                                   |
| 11:34966542T>G        | rs147215008  | ALS_2           | PDHX      | 0.005184  | ././benign/././././NA/10.57                                                         | .                                              |
| 11:47617440T>C        | .            | ALS_2           | MTCH2     | .         | ././benign/././././NA/16.18                                                         | .                                              |
| 11:66852917G>A        | rs780941915  | ALS_2           | PC        | 0.0006375 | ././benign/././././NA/11.12                                                         | .                                              |

|                            |              |                 |         |           |                                                                                                      |                                              |
|----------------------------|--------------|-----------------|---------|-----------|------------------------------------------------------------------------------------------------------|----------------------------------------------|
| 11:66871069C>A             | rs147945506  | ALS_2           | PC      | 0.0016429 | deleterious/benign/pathogenic/Conflicting_interpretations_of_pathogenicity/0.603/0.389/1/1.48/D/23.3 | Pyruvate_carboxylase_deficiency not_provided |
| 11:67606954CCTCAGTGCT>C    | .            | ALS_2           | NDUFV1  | .         | ./././././././10.18                                                                                  | .                                            |
| 11:67606965TGAAAGGTGACAG>T | .            | ALS_2           | NDUFV1  | .         | ././././././20.9                                                                                     | .                                            |
| 11:72356486G>T             | .            | ALS_2           | CLPB    | .         | ././benign/././././NA/19.88                                                                          | .                                            |
| 12:25204247T>TA            | rs1323271219 | ALS_1           | ETFRF1  | 6.569E-06 | ././././././NA/34                                                                                    | .                                            |
| 12:32730865A>T             | .            | ALS_2           | DNM1L   | .         | ././benign/././././NA/10.09                                                                          | .                                            |
| 12:50106297G>A             | rs34783513   | ALS_2;<br>ALS_3 | GPD1    | 0.0013671 | tolerated/benign/pathogenic/Benign/Likely_benign/0.005/0.004/1/1.975/T/19.70                         | not_provided                                 |
| 12:51052368T>A             | .            | ALS_2           | LETMD1  | .         | ././benign/././././NA/11.94                                                                          | .                                            |
| 12:55992611GAGC>G          | rs772313510  | ALS_2;<br>ALS_3 | SUOX    | 0.0002433 | ././././././NA/11.78                                                                                 | .                                            |
| 12:56268861T>G             | .            | ALS_2           | COQ10A  | .         | ././benign/././././NA/17.49                                                                          | .                                            |
| 12:57765659C>T             | rs35569378   | ALS_3           | CYP27B1 | 0.0059116 | ././benign/Likely_benign/./././NA/10.14                                                              | not_provided                                 |
| 12:57772807C>T             | rs34913183   | ALS_2           | CYP27B1 | 0.0086529 | tolerated/benign/benign/./0.196/0.016/1/0.895/T/22.5                                                 | .                                            |
| 12:57780492T>C             | rs111299874  | ALS_2           | TSFM    | 0.0060924 | deleterious/possibly_damaging/benign/./0.818/0.559/0.973/2.395/T/24.8                                | .                                            |
| 12:81143432T>C             | .            | ALS_2           | ACSS3   | .         | ././benign/././././NA/11.85                                                                          | .                                            |
| 12:98593876G>C             | rs976686538  | ALS_2;<br>ALS_3 | SLC25A3 | 6.571E-05 | ././benign/././././NA/17.49                                                                          | .                                            |
| 12:98595256C>A             | .            | ALS_2           | SLC25A3 | .         | ././benign/././././NA/10.93                                                                          | .                                            |
| 12:105052736A>T            | .            | ALS_2           | ALDH1L2 | .         | ././benign/././././NA/12.85                                                                          | .                                            |
| 12:111748449C>T            | rs150643910  | ALS_2           | ACAD10  | 6.571E-05 | tolerated/benign/benign/./0.904/0.328/0.988/2.16/D/13.91                                             | .                                            |
| 12:113291233C>A            | rs1956256422 | ALS_2           | TPCN1   | 6.571E-06 | ././benign/././././NA/11.56                                                                          | .                                            |
| 12:120312595C>T            | rs138164230  | ALS_1           | SIRT4   | 0.0035229 | deleterious/possibly_damaging/benign/./0.922/0.67/0.753/2.36/T/23.3                                  | .                                            |
| 13:41886121T>A             | .            | ALS_2           | VWA8    | .         | ././benign/././././NA/12.35                                                                          | .                                            |
| 14:24306420G>A             | rs148872765  | ALS_1           | NOP9    | 0.000611  | deleterious/probably_damaging/pathogenic/./1/0.982/1/3.435/T/27.2                                    | .                                            |

|                    |              |                 |          |           |                                                                              |                                                                        |
|--------------------|--------------|-----------------|----------|-----------|------------------------------------------------------------------------------|------------------------------------------------------------------------|
| 14:36729308T>A     | .            | ALS_2           | SLC25A21 | .         | ./benign/./././NA/16.07                                                      | .                                                                      |
| 14:36729648A>G     | rs1884743435 | ALS_2           | SLC25A21 | .         | ./benign/./././NA/18.05                                                      | .                                                                      |
| 14:36874765G>A     | rs775098279  | ALS_1           | SLC25A21 | 0.0002563 | ./pathogenic/./././NA/14.84                                                  | .                                                                      |
| 14:74500948C>T     | rs143010135  | ALS_2           | ISCA2    | 0.0003417 | tolerated/benign/benign/Uncertain_significance/0.309/0.053/0.955/1.35/T/23.1 | Glaucoma_3_primary_congenital_d Weill-Marchesani_syndrome not_provided |
| 14:74881864G>A     | rs991279742  | ALS_2           | DLST     | 0.0001183 | ./benign/./././NA/11.32                                                      | .                                                                      |
| 15:65155732T>C     | rs147893822  | ALS_2           | CLPX     | 0.0001051 | tolerated/benign/benign/./0.623/0.401/1/1.325/T/21.4                         | .                                                                      |
| 15:76274185T>C     | rs139097487  | ALS_3           | ETFA     | 0.0069497 | ./benign/Likely_benign/./././NA/11.72                                        | not_provided                                                           |
| 16:683424C>G       | rs72773413   | ALS_1           | JMJD8    | 0.0040884 | deleterious/probably_damaging/pathogenic/./1/1/1/3.07/T/28.9                 | .                                                                      |
| 16:1414080C>G      | rs201417307  | ALS_3           | UNKL     | 0.0027859 | ./benign/./././NA/10.29                                                      | .                                                                      |
| 16:1984584C>A      | rs550296574  | ALS_2;<br>ALS_3 | GFER     | 0.0021418 | ./benign/./././NA/10.08                                                      | .                                                                      |
| 16:1993259C>T      | rs958228085  | ALS_2           | SYNGR3   | 3.284E-05 | ./benign/./././NA/14.19                                                      | .                                                                      |
| 16:20418224C>T     | rs144548629  | ALS_2           | ACSM5    | 0.0080265 | deleterious/probably_damaging/pathogenic/./1/0.999/1/4.305/T/21.6            | .                                                                      |
| 16:20777354T>A     | .            | ALS_2           | ACSM3    | .         | ./pathogenic/./././NA/15.15                                                  | .                                                                      |
| 16:20790494T>C     | rs1208479326 | ALS_2           | ACSM3    | 6.57E-06  | ./benign/./././NA/12.96                                                      | .                                                                      |
| 16:28846253G>A     | rs1389713655 | ALS_2           | TUFM     | 1.315E-05 | tolerated/benign/benign/./0/0.001/0.985/0/T/14.37                            | .                                                                      |
| 16:68078931A>G     | rs140584572  | ALS_2           | DUS2     | 3.941E-05 | deleterious/benign/benign/./0.024/0.012/0.547/1.04/T/23.3                    | .                                                                      |
| 17:43175696C>T     | rs117439494  | ALS_2           | NBR1     | 0.0046485 | ./benign/./././NA/11.57                                                      | .                                                                      |
| 17:50112976C>T     | rs201142482  | ALS_1           | PDK2     | 0.0002168 | deleterious/possibly_damaging/pathogenic/./0.94/0.197/0.999/2.05/T/25.8      | .                                                                      |
| 17:64506909G>A     | rs149693682  | ALS_3           | CEP95    | 0.0037114 | ./pathogenic/./././NA/16.62                                                  | .                                                                      |
| 17:75003577G>T     | rs187215004  | ALS_3           | CDR2L    | 0.0005715 | tolerated/possibly_damaging/benign/./0.995/0.83/1/1.845/T/22.9               | .                                                                      |
| 17:75289560T>A     | rs182532666  | ALS_2           | SLC25A19 | 0.0020367 | ./benign/./././NA/16.07                                                      | .                                                                      |
| 17:81941891GCTGT>G | rs200797941  | ALS_2;<br>ALS_3 | PYCR1    | 0.0073977 | ./././././NA/13.94                                                           | .                                                                      |
| 18:46098232C>T     | rs546539852  | ALS_1           | ATP5F1A  | 0.0002234 | ./benign/./././NA/22.0                                                       | .                                                                      |
| 19:1105691G>A      | rs76201145   | ALS_1           | GPX4     | 0.0006963 | tolerated/benign/pathogenic/./0.063/0.069/1/1.635/T/23.2                     | .                                                                      |

|                                                      |              |                 |                |           |                                                                             |   |
|------------------------------------------------------|--------------|-----------------|----------------|-----------|-----------------------------------------------------------------------------|---|
| 19:12904533G>A                                       | rs189296436  | ALS_2;<br>ALS_3 | GCDH           | 0.0026557 | tolerated/probably_damaging/pathogenic/. /0.996/0.93<br>7/0.904/1.87/D/22.8 | . |
| 19:12948812C>T                                       | rs4987202    | ALS_2;<br>ALS_3 | GADD45GIP<br>1 | 0.0072724 | tolerated/benign/benign/. /0.007/0.009/0.992/1.1/T/22.5                     | . |
| 19:19535632C>G                                       | rs146733860  | ALS_3           | YJEFN3         | 0.0052825 | tolerated/probably_damaging/benign/. /1/0.992/1/1.83/<br>T/23.6             | . |
| 19:45768141G>A                                       | rs1014350413 | ALS_2;<br>ALS_3 | DMPK           | 6.568E-05 | deleterious/possibly_damaging/pathogenic/. /0.99/0.86<br>2/1/3.295/D/29.1   | . |
| 19:48613266T>G                                       | rs1205554355 | ALS_2           | FAM83E         | .         | deleterious/probably_damaging/pathogenic/. /1/0.999/<br>1/3.32/T/25.0       | . |
| 19:48636843G>T                                       | rs150228428  | ALS_1           | CA11           | 0.0086136 | ././benign/././././NA/16.35                                                 | . |
| 20:6041600A>T                                        | rs145844426  | ALS_1           | CRLS1          | 0.0038832 | deleterious/probably_damaging/pathogenic/. /0.995/0.<br>922/1/2.9/D/26.9    | . |
| 20:17970372T>A                                       | .            | ALS_2           | MGME1          | .         | ././pathogenic/./././1/./NA/34                                              | . |
| 22:17554179G>T                                       | .            | ALS_2           | CECR2          | .         | ././benign/././././NA/14.62                                                 | . |
| 22:19435831C>T                                       | rs138093372  | ALS_3           | MRPL40         | 0.000184  | tolerated/possibly_damaging/pathogenic/. /0.999/0.867<br>/1/2.89/T/22.6     | . |
| 22:29767548G>G<br>AA                                 | rs749795682  | ALS_2           | UQCR10         | 2.634E-05 | ././././././NA/33                                                           | . |
| 22:29767549G>G<br>CTGTGGAAAC<br>ACATCAAGC<br>ACAAGTA | rs760862598  | ALS_2           | UQCR10         | 2.17E-05  | ././././././NA/25.8                                                         | . |
| 22:30416398G>A                                       | rs191341134  | ALS_3           | SEC14L2        | 3.942E-05 | deleterious/probably_damaging/pathogenic/. /1/1/1/3.<br>795/D/28.8          | . |
| 22:39513721G>A                                       | rs2232091    | ALS_2           | MIEF1          | 0.0061948 | tolerated/benign/pathogenic/. /0.077/0.058/1/-<br>0.11/T/23.5               | . |
| 22:50217114G>A                                       | rs34163881   | ALS_2;<br>ALS_3 | SELENOO        | 0.0074234 | deleterious/probably_damaging/pathogenic/. /0.998/0.<br>931/1/3.365/T/28.1  | . |



**Table S3.** nDNA genes containing variants in the WES/WGS datasets associated with Amyotrophic Lateral Sclerosis as identified by DisGeNet

|                | Gene     | Gene Name                                                                     | * gda Score |
|----------------|----------|-------------------------------------------------------------------------------|-------------|
| WES<br>dataset | *DNM1L   | dynamamin 1 like                                                              | 0.05        |
|                | SIRT3    | sirtuin 3                                                                     | 0.02        |
|                | *ATP5F1A | ATP synthase F1 subunit alpha                                                 | 0.01        |
|                | *OPA1    | OPA1 mitochondrial dynamamin like GTPase                                      | 0.01        |
|                | *PARK7   | Parkinsonism associated deglycase                                             | 0.01        |
|                | HTRA2    | HtrA serine peptidase 2                                                       | 0.01        |
|                | IDI1     | isopentenyl-diphosphate delta isomerase 1                                     | 0.01        |
| WGS<br>dataset | GSR      | glutathione-disulfide reductase                                               | 0.32        |
|                | CASP3    | caspase 3                                                                     | 0.29        |
|                | SLC25A12 | solute carrier family 25 member 12                                            | 0.1         |
|                | PINK1    | PTEN induced kinase 1                                                         | 0.06        |
|                | FGF2     | fibroblast growth factor 2                                                    | 0.05        |
|                | OXR1     | oxidation resistance 1                                                        | 0.04        |
|                | VDAC1    | voltage dependent anion channel 1                                             | 0.04        |
|                | CYP27A1  | cytochrome P450 family 27 subfamily A member 1                                | 0.03        |
|                | FXN      | frataxin                                                                      | 0.03        |
|                | TFAM     | transcription factor A, mitochondrial                                         | 0.03        |
|                | GLS      | glutaminase                                                                   | 0.02        |
|                | PRKN     | parkin RBR E3 ubiquitin protein ligase                                        | 0.02        |
|                | SLC25A37 | solute carrier family 25 member 37                                            | 0.02        |
|                | ATAT1    | alpha tubulin acetyltransferase 1                                             | 0.01        |
|                | *ATP5F1A | ATP synthase F1 subunit alpha                                                 | 0.01        |
|                | BNIP3L   | BCL2 interacting protein 3 like                                               | 0.01        |
|                | CASP8    | caspase 8                                                                     | 0.01        |
|                | DLD      | dihydrolipoamide dehydrogenase                                                | 0.01        |
|                | *DNM1L   | dynamamin 1 like                                                              | 0.01        |
|                | HADHA    | hydroxyacyl-CoA dehydrogenase trifunctional multienzyme complex subunit alpha | 0.01        |
|                | ITPR3    | inositol 1,4,5-trisphosphate receptor type 3                                  | 0.01        |
|                | MAP1B    | microtubule associated protein 1B                                             | 0.01        |
|                | MCU      | mitochondrial calcium uniporter                                               | 0.01        |
|                | MRPS30   | mitochondrial ribosomal protein S30                                           | 0.01        |
|                | NIF3L1   | NGG1 interacting factor 3 like 1                                              | 0.01        |
|                | NLN      | neurolysin                                                                    | 0.01        |
|                | *OPA1    | OPA1 mitochondrial dynamamin like GTPase                                      | 0.01        |
|                | *PARK7   | Parkinsonism associated deglycase                                             | 0.01        |
|                | PDAP1    | PDGFA associated protein 1                                                    | 0.01        |
|                | PDSS1    | decaprenyl diphosphate synthase subunit 1                                     | 0.01        |
|                | SIRT5    | sirtuin 5                                                                     | 0.01        |

gda Score: DisGeneNet database gives a score of this association from 0 to 1 based on type of sources (level of curation, model organisms) and the number of publications supporting the association. \* Genes containing variants that overlapped in the two datasets.

**Table S4.** Genes alphabetically ordered containing at least three variants that have passed variant prioritization filters in Amyotrophic Lateral Sclerosis (ALS) patients in the Whole Exome Sequencing (WES) and Whole Genome Sequencing (WGS) datasets.

| OFFICIAL<br>GENE<br>SYMBOL | Gene Name                                               | N°<br>Variants<br>WGS<br>(WES) | WGS | WES | DisGeN<br>ET | ALSoD |
|----------------------------|---------------------------------------------------------|--------------------------------|-----|-----|--------------|-------|
| ACACA                      | acetyl-CoA carboxylase alpha                            | 4(0)                           | X   |     |              |       |
| ACSM3                      | acyl-CoA synthetase medium chain family member 3        | 2(2)                           | X   | X   |              |       |
| AFG1L                      | AFG1 like ATPase                                        | 6(0)                           | X   |     |              |       |
| ALDH1L1                    | aldehyde dehydrogenase 1 family member L1               | 3(0)                           | X   |     |              |       |
| ARG2                       | arginase 2                                              | 3(0)                           | X   |     |              |       |
| ATP5F1D                    | ATP synthase F1 subunit delta                           | 3(0)                           | X   |     |              |       |
| BCKDHB                     | branched chain keto acid dehydrogenase E1 subunit beta  | 6(0)                           | X   |     |              |       |
| BCL2                       | BCL2 apoptosis regulator                                | 4(0)                           | X   |     |              |       |
| BCL2L1                     | BCL2 like 1                                             | 3(0)                           | X   |     |              |       |
| CCDC51                     | coiled-coil domain containing 51                        | 3(0)                           | X   |     |              |       |
| CHCHD3                     | coiled-coil-helix-coiled-coil-helix domain containing 3 | 10(0)                          | X   |     |              |       |
| CHCHD6                     | coiled-coil-helix-coiled-coil-helix domain containing 6 | 7(0)                           | X   |     |              |       |
| CLPB                       | ClpB family mitochondrial disaggregase                  | 1(2)                           | X   | X   |              |       |
| CLYBL                      | citramalyl-CoA lyase                                    | 11(0)                          | X   |     |              |       |
| COMT                       | catechol-O-methyltransferase                            | 3(0)                           | X   |     |              |       |
| CRLS1                      | cardiolipin synthase 1                                  | 2(1)                           | X   | X   |              |       |
| CYB5R3                     | cytochrome b5 reductase 3                               | 3(0)                           | X   |     |              |       |
| DBT                        | dihydrolipoamide branched chain transacylase E2         | 3(0)                           | X   |     |              |       |
| DELE1                      | DAP3 binding cell death enhancer 1                      | 2(1)                           | X   | X   |              |       |
| DMGDH                      | dimethylglycine dehydrogenase                           | 3(0)                           | X   |     |              |       |
| DMPK                       | DM1 protein kinase                                      | 1(2)                           | X   | X   |              |       |
| DNAJC11                    | DnaJ heat shock protein family                          | 4(2)                           | X   | X   |              |       |
| ETFA                       | electron transfer flavoprotein subunit alpha            | 5(1)                           | X   | X   |              |       |
| FHIT                       | fragile histidine triad diadenosine triphosphatase      | 26(0)                          | X   |     |              |       |
| GADD45G<br>IP1             | GADD45G interacting protein 1                           | 1(2)                           | X   | X   |              |       |
| GATM                       | glycine amidinotransferase                              | 3(0)                           | X   |     |              |       |
| GFER                       | growth factor, augmentor of liver regeneration          | 2(2)                           | X   | X   |              |       |
| GLDC                       | glycine decarboxylase                                   | 3(0)                           | X   |     |              |       |
| GLS                        | glutaminase                                             | 3(0)                           | X   |     | X            |       |
| GP2D                       | glycerol-3-phosphate dehydrogenase 2                    | 7(0)                           | X   |     |              |       |
| HIBADH                     | 3-hydroxyisobutyrate dehydrogenase                      | 4(0)                           | X   |     |              |       |
| IDE                        | insulin degrading enzyme                                | 5(0)                           | X   |     |              |       |

|         |                                                         |       |   |   |   |   |
|---------|---------------------------------------------------------|-------|---|---|---|---|
| IMMP2L  | inner mitochondrial membrane peptidase subunit 2        | 11(0) | X |   |   |   |
| LARS2   | leucyl-tRNA synthetase 2, mitochondrial                 | 2(1)  | X | X |   |   |
| LYRM2   | LYR motif containing 2                                  | 1(2)  | X | X |   |   |
| MCU     | mitochondrial calcium uniporter                         | 3(0)  | X |   |   | X |
| METAP1D | methionyl aminopeptidase type 1D, mitochondrial         | 5(0)  | X |   |   |   |
| METTL8  | methyltransferase 8, tRNA N3-cytidine                   | 4(0)  | X |   |   |   |
| MICU2   | mitochondrial calcium uptake 2                          | 3(0)  | X |   |   |   |
| MRPL1   | mitochondrial ribosomal protein L1                      | 3(0)  | X |   |   |   |
| MRPS27  | mitochondrial ribosomal protein S27                     | 3(0)  | X |   |   |   |
| MRPS6   | mitochondrial ribosomal protein S6                      | 5(0)  | X |   |   |   |
| MRRF    | mitochondrial ribosome recycling factor                 | 5(1)  | X | X |   |   |
| MSRA    | methionine sulfoxide reductase A                        | 20(0) | X |   |   |   |
| MTHFD1L | methylenetetrahydrofolate dehydrogenase                 | 3(0)  | X |   |   |   |
| MTHFD2L | methylenetetrahydrofolate dehydrogenase                 | 5(0)  | X |   |   | X |
| MTX2    | metaxin 2                                               | 5(0)  | X |   |   |   |
| NARS2   | asparaginyl-tRNA synthetase 2, mitochondrial            | 4(0)  | X |   |   |   |
| NBR1    | NBR1 autophagy cargo receptor                           | 2(1)  | X | X |   |   |
| NDUFS2  | NADH:ubiquinone oxidoreductase core subunit S2          | 3(0)  | X |   |   |   |
| NDUFV2  | NADH:ubiquinone oxidoreductase core subunit V2          | 4(0)  | X |   |   |   |
| NRDC    | nardilysin convertase                                   | 2(1)  | X | X |   |   |
| NUBPL   | NUBP iron-sulfur cluster assembly factor, mitochondrial | 4(0)  | X |   |   |   |
| OCIAD1  | OCIA domain containing 1                                | 2(1)  | X | X |   |   |
| OGG1    | 8-oxoguanine DNA glycosylase                            | 2(2)  | X | X |   | X |
| OPA1    | OPA1 mitochondrial dynamin like GTPase                  | 2(2)  | X | X | X |   |
| OSBPL1A | oxysterol binding protein like 1A                       | 3(0)  | X |   |   |   |
| OXCT1   | 3-oxoacid CoA-transferase 1                             | 3(0)  | X |   |   |   |
| OXR1    | oxidation resistance 1                                  | 7(0)  | X |   | X |   |
| PARK7   | Parkinsonism associated deglycase                       | 1(2)  | X | X | X | X |
| PC      | pyruvate carboxylase                                    | 2(3)  | X | X |   |   |
| PCCA    | propionyl-CoA carboxylase subunit alpha                 | 6(0)  | X |   |   |   |
| PDE2A   | phosphodiesterase 2A                                    | 4(0)  | X |   |   |   |
| PDHX    | pyruvate dehydrogenase complex component X              | 2(1)  | X | X |   |   |
| PDSS1   | decaprenyl diphosphate synthase subunit 1               | 3(0)  | X |   | X |   |
| PDSS2   | decaprenyl diphosphate synthase subunit 2               | 6(0)  | X |   |   |   |
| PNKD    | PNKD metallo-beta-lactamase domain containing           | 3(0)  | X |   |   |   |
| PNPLA8  | patatin like phospholipase domain containing 8          | 3(0)  | X |   |   |   |
| POLQ    | DNA polymerase theta                                    | 2(1)  | X | X |   |   |
| PRELID2 | PRELI domain containing 2                               | 1(4)  | X | X |   |   |
| PREPL   | prolyl endopeptidase like                               | 1(2)  | X | X |   |   |
| RARS2   | arginyl-tRNA synthetase 2, mitochondrial                | 2(1)  | X | X |   |   |
| RTN4IP1 | reticulon 4 interacting protein 1                       | 1(2)  | X | X |   |   |

|          |                                                          |       |   |   |
|----------|----------------------------------------------------------|-------|---|---|
| SFXN2    | sideroflexin 2                                           | 0(4)  |   | X |
| SFXN5    | sideroflexin 5                                           | 5(0)  | X |   |
| SHMT2    | serine hydroxymethyltransferase 2                        | 4(0)  | X |   |
| SLC25A21 | solute carrier family 25 member 21                       | 15(3) | X | X |
| SLC25A26 | solute carrier family 25 member 26                       | 5(0)  | X |   |
| SLC25A3  | solute carrier family 25 member 3                        | 0(3)  |   | X |
| SLC25A35 | solute carrier family 25 member 35                       | 4(0)  | X |   |
| SND1     | staphylococcal nuclease and tudor domain<br>containing 1 | 11(0) | X |   |
| SPHKAP   | SPHK1 interactor, AKAP domain containing                 | 4(0)  | X |   |
| SPIRE1   | spire type actin nucleation factor 1                     | 3(0)  | X |   |
| STX17    | syntaxin 17                                              | 3(2)  | X | X |
| SUGCT    | succinyl-CoA:glutarate-CoA transferase                   | 7(0)  | X |   |
| SUOX     | sulfite oxidase                                          | 1(2)  | X | X |
| TMEM65   | transmembrane protein 65                                 | 2(1)  | X | X |
| TSFM     | Ts translation elongation factor,<br>mitochondrial       | 2(1)  | X | X |
| VPS13D   | vacuolar protein sorting 13 homolog D                    | 1(5)  | X | X |
| VWA8     | von Willebrand factor A domain containing 8              | 4(1)  | X | X |

---

**Table S5.** List of 12 prioritized mtDNA variant sites in the WES cohort

| Locus    | Variant Position | Variant ID   | Variant nature | N° Cases       | AF Het      | AF Hom   | Pathogenicity (Hmtdb)   | ClinVarSignificance/MutPred_Prediction/Panther_Prediction/PhDSNP_Prediction/SNPs GO_Prediction/Polyphen2HumDiv_Prediction/Polyphen2HumVar_Prediction | pon_tRNA /MitoTIP_prediction | Mitomap Disease                                                                        | ClinVar's disease name                                                                                |
|----------|------------------|--------------|----------------|----------------|-------------|----------|-------------------------|------------------------------------------------------------------------------------------------------------------------------------------------------|------------------------------|----------------------------------------------------------------------------------------|-------------------------------------------------------------------------------------------------------|
| CR - HV2 | 152T>C           | rs117135796  | Het            | ALS_2          | 0.00342     |          | pending classification  | -./././././                                                                                                                                          |                              |                                                                                        |                                                                                                       |
| CR - HV2 | 195T>C           | .            | Het            | ALS_1          | 0.00240753  |          |                         | -./././././                                                                                                                                          |                              |                                                                                        |                                                                                                       |
| CR - HV2 | 198C>T           | rs879040416  | Het            | ALS_1          | 0.000461525 |          |                         | -./././././                                                                                                                                          |                              | BD-associated/<br>melanoma pts                                                         |                                                                                                       |
| CR - HV3 | 456C>T           | rs41356551   | Het            | ALS_2          | 0.000124    |          | pending classification, | -./././././                                                                                                                                          |                              |                                                                                        |                                                                                                       |
| 12 S     | 721T>C           | rs1556422479 | Het            | ALS_2          | 0.0000354   |          |                         | Likely benign./././././                                                                                                                              |                              | Possibly LVNC-associated                                                               | not provided                                                                                          |
| 12 S     | 1007G>A          | rs111033213  | Het/<br>Hom    | ALS_2<br>ALS_3 | 0.000124    | 0.00108  | pending classification  | Benign./././././                                                                                                                                     |                              |                                                                                        | not specified                                                                                         |
| MT-TQ    | 4336T>C          | rs41456348   | Het            | ALS_2          | 0.0000177   |          | likely pathogenic, tRNA | Conflicting interpretations of pathogenicity./././././                                                                                               | Neutral/<br>possibly benign  | ADPD /<br>Hearing Loss &<br>Migraine /<br>autism spectrum /<br>intellectual disability | Juvenile myopathy, encephalopathy, lactic acidosis AND stroke<br>Sensori-neural deafness and migraine |
| MT-CO1   | 7410C>T          | .            | Het            | ALS_2          | /           |          | pathogenic              | /low_pathogenicity/neutral/disease/neutral/probably_damaging/possibly_damaging/                                                                      |                              |                                                                                        |                                                                                                       |
| MT-CO2   | 8027G>A          | rs1116904    | Het/Hom        | ALS_2<br>ALS_3 | 0.000124    | 0.074    | likely pathogenic       | Benign/low_pathogenicity/neutral/neutral/neutral/probably_damaging/probably_damaging/                                                                |                              |                                                                                        | Leigh syndrome                                                                                        |
| MT-TS2   | 12235T>C         | rs1556424083 | Het/<br>Hom    | ALS_2<br>ALS_3 | 0.0000532   | 0.000514 | polymorphic, tRNA       | Benign./././././                                                                                                                                     | Neutral/<br>possibly benign  | Hearing loss                                                                           | Juvenile myopathy, encephalopathy, lactic acidosis AND stroke                                         |
| CR - HV1 | 16240A>G         | rs386829288  | Het/<br>Hom    | ALS_2<br>ALS_3 | 0.000177    | 0.00239  | pending classification, | -./././././                                                                                                                                          |                              |                                                                                        |                                                                                                       |
| CR - HV1 | 16304T>C         | rs386829305  | Het            | ALS_2          | 0.000142    |          | pending classification, | -./././././                                                                                                                                          |                              |                                                                                        |                                                                                                       |

**Table S6.** Statistics related to the Whole Genome Sequencing Dataset

| STATUS                                 | ALS1_497  | ALS2_503  | ALS3_536   | ALS4_539  | ALS5_5608 | ALS6_5609 | ALS7_5610 | ALS8_5611 | CNTR1_596  | CNTR2_597  | CNTR3_598  | CNTR4_599  | Mean      |
|----------------------------------------|-----------|-----------|------------|-----------|-----------|-----------|-----------|-----------|------------|------------|------------|------------|-----------|
| <b>FASTQ FILES</b>                     |           |           |            |           |           |           |           |           |            |            |            |            |           |
| read count r1                          | 460675189 | 451060045 | 502247526  | 449148192 | 426007105 | 487763586 | 421977005 | 391392148 | 532843239  | 500413481  | 550409446  | 551923000  | 477154997 |
| read count r2                          | 460675189 | 451060045 | 502247526  | 449148192 | 426007105 | 487763586 | 421977005 | 391392148 | 532843239  | 500413481  | 550409446  | 551923000  | 477154997 |
| total read count                       | 921350378 | 902120090 | 1004495052 | 898296384 | 852014210 | 975527172 | 843954010 | 782784296 | 1065686478 | 1000826962 | 1100818892 | 1103846000 | 954309994 |
| <b>nDNA Variant in Mitocarta genes</b> |           |           |            |           |           |           |           |           |            |            |            |            |           |
| n.extended Mitocarta                   | 109570    | 106053    | 107555     | 106698    | 97874     | 98890     | 97096     | 98893     | 126826     | 119187     | 114456     | 107024     | 107510    |
| median depth                           | 31        | 30        | 31         | 29        | 26        | 29        | 26        | 24        | 36         | 35         | 34         | 35         | 30        |
| <b>MAPPING DATA to mtDNA</b>           |           |           |            |           |           |           |           |           |            |            |            |            |           |
| n°Reads                                | 2470063   | 2362993   | 3050243    | 3077180   | 3229335   | 3825246   | 3428085   | 3631458   | 5070990    | 6179947    | 8853880    | 6572442    | 4312655   |
| % mapped reads to chrM                 | 100       | 100       | 100        | 100       | 100       | 100       | 100       | 100       | 100        | 100        | 100        | 100        | 100       |
| mean coverage target region            | 17872     | 16874     | 21638      | 21368     | 19637     | 22382     | 20685     | 21927     | 31061      | 36337      | 43373      | 35549      | 25725     |
| mean mapping quality                   | 40        | 40        | 40         | 40        | 37        | 37        | 37        | 37        | 40         | 40         | 40         | 40         | 39        |
| duplicate reads                        | 486135    | 489778    | 647242     | 705166    | 1036029   | 1323948   | 1117521   | 1182530   | 1620900    | 2145069    | 4040421    | 2628729    | 1451956   |
| % duplicate reads                      | 20%       | 21%       | 21%        | 23%       | 32%       | 35%       | 33%       | 33%       | 32%        | 35%        | 46%        | 40%        | 31%       |
| GC Percentage                          | 45%       | 45%       | 45%        | 45%       | 44%       | 44%       | 44%       | 44%       | 45%        | 45%        | 44%        | 44%        | 44%       |
| <b>mtDNA Variant Calling</b>           |           |           |            |           |           |           |           |           |            |            |            |            |           |
| n.variants                             | 69        | 95        | 35         | 16        | 15        | 36        | 41        | 14        | 180        | 73         | 55         | 16         | 54        |
| homoplasmic                            | 14        | 27        | 29         | 13        | 13        | 33        | 27        | 11        | 66         | 32         | 35         | 12         | 26        |
| heteroplasmic                          | 55        | 68        | 6          | 4         | 2         | 3         | 14        | 3         | 114        | 41         | 21         | 4          | 28        |
| median depth                           | 2130      | 3235      | 9640       | 11990     | 10538     | 10242     | 6232      | 12777     | 1991       | 10428      | 16278      | 26761      | 10187     |

**Table S7.** List of 842 nDNA variant sites ranked by priority in the WGS dataset.

| Variant Position  | ID           | N° Cases               | GeneName | AF       | SIFT/PolyPhen/FATHMM_score/CLNSIG/Polyphen2<br>HDIV/Polyphen2<br>HVAR/MutationTaster/MutationAssessor/MetaSVM<br>Score/CADD_PHRED Score | CLNDN                                                             |
|-------------------|--------------|------------------------|----------|----------|-----------------------------------------------------------------------------------------------------------------------------------------|-------------------------------------------------------------------|
| 1:1303203G>A      | rs145087137  | ALS2_503               | ACAP3    | 0.007621 | deleterious/possibly_damaging/pathogenic/.0.763/0.245/0.996/1.905/T/28.5                                                                | .                                                                 |
| 1:1304812G>A      | rs138176063  | ALS2_503               | PUSL1    | 0.00934  | ././benign/././././12.85                                                                                                                | .                                                                 |
| 1:1305568G>A      | rs746318266  | ALS2_503               | PUSL1    | 0.000342 | ././benign/././././10.09                                                                                                                | .                                                                 |
| 1:1462652C>G      | rs181068440  | ALS2_503;<br>ALS7_5610 | ATAD3C   | 0.003873 | tolerated/benign/benign/.0.011/0.007/0.959/2.075/T/12.80                                                                                | .                                                                 |
| 1:6289723G>T      | rs187044080  | ALS8_5611              | ACOT7    | 0.001637 | ././benign/././././10.34                                                                                                                | .                                                                 |
| 1:6652197G>C      | rs560875462  | ALS3_536               | DNAJC11  | 0.003279 | ././benign/././././10.68                                                                                                                | .                                                                 |
| 1:6665523T>C      | rs755432636  | ALS4_539               | DNAJC11  | 0.000223 | ././pathogenic/././././11.08                                                                                                            | .                                                                 |
| 1:6681067A>C      | rs41310361   | ALS5_5608              | DNAJC11  | 0.003548 | ././benign/././././12.95                                                                                                                | .                                                                 |
| 1:6701331G>A      | rs141622479  | ALS7_5610              | DNAJC11  | 0.003896 | ././benign/././././12.11                                                                                                                | .                                                                 |
| 1:7962280G>A      | rs1449679359 | ALS8_5611              | PARK7    | 6.58E-06 | ././benign/././././12.62                                                                                                                | .                                                                 |
| 1:9539454C>G      | rs1316540335 | ALS1_497               | SLC25A33 | 1.98E-05 | ././benign/././././18.16                                                                                                                | .                                                                 |
| 1:9588674C>T      | rs567615396  | ALS5_5608              | SLC25A33 | 0.002117 | ././benign/././././10.08                                                                                                                | .                                                                 |
| 1:12266959G>A     | rs375749880  | ALS8_5611              | VPS13D   | 0        | tolerated/benign/benign/.0.006/0.01/0.739/1.245/T/22.7                                                                                  | .                                                                 |
| 1:12332992T>C     | .            | ALS3_536               | VPS13D   | 0        | ././benign/././././10.86                                                                                                                | .                                                                 |
| 1:12406861G>A     | rs147534406  | ALS3_536               | VPS13D   | 0.009668 | ././benign/././././15.17                                                                                                                | .                                                                 |
| 1:12467619C>G     | rs550692826  | ALS4_539               | VPS13D   | 0.001636 | ././pathogenic/././././16.72                                                                                                            | .                                                                 |
| 1:12481581G>A     | rs149525503  | ALS2_503               | VPS13D   | 0.002668 | ././benign/././././15.26                                                                                                                | .                                                                 |
| 1:20654663G>A     | rs142593688  | ALS7_5610              | PINK1    | 0.000493 | ././pathogenic/Uncertain_significance/0.991/0.87/1/2.4/D/25.1                                                                           | Congenital_disorder_of_glycosylation_type_Ir                      |
| 1:33036780G>C     | rs138577419  | ALS1_497               | AK2      | 0.001295 | deleterious/benign/pathogenic/Conflicting_interpretations_of_pathogenicity/0.877/0.54/1/2.45/T/25.4                                     | Reticular_dysgenesis not_provided                                 |
| 1:36471505C>T     | rs3918019    | ALS5_5608              | CSF3R    | 0.004671 | tolerated/benign/benign/Benign/0.915/0.217/0.989/1.84/T/17.76                                                                           | Neutropenia_severe_congenital_7_autosomal_recessive not_specified |
| 1:37808187A>G     | rs560598698  | ALS1_497               | YRDC     | 0.001296 | ././benign/././././11.16                                                                                                                | .                                                                 |
| 1:37809850A>G     | .            | ALS4_539               | YRDC     | 6.57E-06 | ././benign/././././14.59                                                                                                                | .                                                                 |
| 1:39021936T>G     | rs184314670  | ALS7_5610              | NDUFS5   | 0.003429 | ././benign/././././13.31                                                                                                                | .                                                                 |
| 1:39857977GATCT>G | rs993821921  | ALS7_5610              | TRIT1    | 3.94E-05 | ././././././17.13                                                                                                                       | .                                                                 |
| 1:45326675C>T     | rs571489423  | ALS4_539               | HPDL     | 0.002551 | ././benign/././././11.83                                                                                                                | .                                                                 |
| 1:45331467G>A     | rs150792276  | ALS4_539               | MUTYH    | 0.000802 | deleterious/benign/benign/Conflicting_interpretations_of_pathogenicity/0.995/0.827/0.973/1.5/T/16.64                                    | Carcinoma_of_colon MYH-associated_polyposis Hereditary_           |

|                          |             |                       |          |          |                                                                                                         |                                                                                                                                               |
|--------------------------|-------------|-----------------------|----------|----------|---------------------------------------------------------------------------------------------------------|-----------------------------------------------------------------------------------------------------------------------------------------------|
|                          |             |                       |          |          |                                                                                                         | cancer-<br>predisposing_syndrome not_spec<br>ified not_provided<br>not_provided                                                               |
| 1:46298275G>C            | rs148912617 | ALS8_5611             | LRRC41   | 0.002517 | ././pathogenic/Benign/././././10.19                                                                     |                                                                                                                                               |
| 1:46672839C>T            | rs932893232 | ALS2_503              | ATPAF1   | 0        | ././benign/./././././13.86                                                                              | .                                                                                                                                             |
| 1:51855542A>C            | rs758534494 | ALS2_503              | NRDC     | 0.000302 | ././benign/./././././14.82                                                                              | .                                                                                                                                             |
| 1:51856928TACAA<br>GCC>T | rs568627193 | ALS7_5610             | NRDC     | 0.001209 | ././././././././12.13                                                                                   | .                                                                                                                                             |
| 1:52978368G>T            | rs144132787 | ALS6_5609             | SCP2     | 7.88E-05 | ././pathogenic/Likely_pathogenic/././1././34                                                            | Leukoencephalopathy_with_dyst<br>onia_and_motor_neuropathy                                                                                    |
| 1:53216053C>T            | rs113278028 | ALS3_536              | C1orf123 | 0.004605 | deleterious/possibly_damaging/pathogenic/./0.894/0.49<br>9/1/2.225/T/26.3                               | .                                                                                                                                             |
| 1:54619975C>T            | rs17399297  | ALS6_5609             | ACOT11   | 0.005731 | ././pathogenic/Likely_benign/0.238/0.041/1/1.625/T/23.0                                                 | not_provided                                                                                                                                  |
| 1:77821390A>AT           | rs199521038 | ALS3_536              | MIGA1    | 0.011389 | ./././././././13.39                                                                                     | .                                                                                                                                             |
| 1:77844376A>G            | rs72685319  | ALS7_5610             | MIGA1    | 0.004505 | ././benign/./././././13.32                                                                              | .                                                                                                                                             |
| 1:88980424A>AT           | rs879210454 | ALS1_497              | KYAT3    | 0.003464 | ./././././././11.73                                                                                     | .                                                                                                                                             |
| 1:88983729C>T            | rs139527615 | ALS4_539              | KYAT3    | 0.006161 | ././benign/./0.81/0.195/1/0.49/T/18.95                                                                  | .                                                                                                                                             |
| 1:94418961G>C            | rs768374353 | ALS2_503              | ABCD3    | 1.31E-05 | ././benign/./././././10.24                                                                              | .                                                                                                                                             |
| 1:100203419A>G           | rs912744456 | ALS1_497              | DBT      | 1.97E-05 | ././benign/./././././12.03                                                                              | .                                                                                                                                             |
| 1:100239137G>A           | rs748935878 | ALS7_5610             | DBT      | 2.63E-05 | ././benign/./././././12.61                                                                              | .                                                                                                                                             |
| 1:100243809C>T           | rs193012505 | ALS7_5610             | DBT      | 0.002687 | ././benign/./././././10.61                                                                              | .                                                                                                                                             |
| 1:108154533C>T           | rs181542559 | ALS4_539              | SLC25A24 | 0.00021  | ././benign/./././././14.84                                                                              | .                                                                                                                                             |
| 1:110006905T>A           | rs149653198 | ALS5_5608             | AHCYL1   | 0.004153 | ././benign/./././././13.07                                                                              | .                                                                                                                                             |
| 1:110023261G>A           | rs140578184 | ALS8_5611             | AHCYL1   | 0.003996 | ././pathogenic/./././././16.30                                                                          | .                                                                                                                                             |
| 1:110028748C>CT          | rs949300125 | ALS1_497              | STRIP1   | 0.000758 | ./././././././13.55                                                                                     | .                                                                                                                                             |
| 1:119140608A>C           | rs139548132 | ALS1_497              | WARS2    | 0.003152 | tolerated/benign/benign/Conflicting_interpretations_of<br>_pathogenicity/0.001/0.002/0.963/2.14/T/17.14 | Neurodevelopmental_disorder,_<br>mitochondrial_with_abnormal_m<br>ovements_and_lactic_acidosis,_wi<br>th_or_without_seizures not_provi<br>ded |
| 1:119393538A>C           | rs587702397 | ALS7_5610             | HAO2     | 0.000164 | ././benign/./././././10.13                                                                              | .                                                                                                                                             |
| 1:147639575T>A           | .           | ALS1_497              | ACP6     | 0        | ././benign/./././././17.39                                                                              | .                                                                                                                                             |
| 1:147639576C>A           | .           | ALS1_497              | ACP6     | 0        | ././benign/./././././16.96                                                                              | .                                                                                                                                             |
| 1:150302541C>T           | rs188389030 | ALS1_497              | MRPS21   | 0.005442 | ././benign/./././././12.33                                                                              | .                                                                                                                                             |
| 1:150572917TAA>T         | rs3839013   | ALS1_497;<br>ALS3_536 | MCL1     | 0.007153 | ./././././././12.24                                                                                     | .                                                                                                                                             |
| 1:151770979T>C           | rs192372329 | ALS7_5610             | TDRKH    | 0.001524 | ././benign/./././././12.24                                                                              | .                                                                                                                                             |
| 1:154979084C>T           | rs545522828 | ALS1_497              | FLAD1    | 0.001039 | ././benign/./././././11.31                                                                              | .                                                                                                                                             |
| 1:154999693C>T           | rs546726851 | ALS6_5609             | ZBTB7B   | 0.002248 | ././benign/./././././10.43                                                                              | .                                                                                                                                             |
| 1:155218096T>C           | .           | ALS5_5608             | MTX1     | 0        | ././pathogenic/./././././18.74                                                                          | .                                                                                                                                             |
| 1:155218462C>T           | rs191564448 | ALS3_536              | MTX1     | 0.001847 | ././benign/./././././11.79                                                                              | .                                                                                                                                             |



|                   |              |                       |          |          |                                                               |               |
|-------------------|--------------|-----------------------|----------|----------|---------------------------------------------------------------|---------------|
| 1:156193343CAGG>C | rs529915033  | ALS4_539              | SLC25A44 | 0.002892 | ./././././././13.61                                           | .             |
| 1:156747328C>A    | rs746709931  | ALS2_503              | HDGF     | 0.000263 | ././benign/././././16.76                                      | .             |
| 1:161038950C>T    | rs114452711  | ALS3_536              | TSTD1    | 0.001788 | ././benign/././././11.65                                      | .             |
| 1:161120749G>A    | rs376379316  | ALS7_5610             | NIT1     | 6.57E-05 | tolerated/benign/pathogenic/./0.089/0.057/0.957/-0.55/T/17.98 | .             |
| 1:161131872T>G    | rs189421017  | ALS7_5610             | DEDD     | 0.000414 | ././benign/././././10.71                                      | .             |
| 1:161198357T>C    | rs61747495   | ALS1_497;<br>ALS2_503 | NDUFS2   | 0.004025 | ././benign/./0.101/0.061/0.999/1.355/T/17.09                  | .             |
| 1:161219108G>A    | rs927999045  | ALS5_5608             | NDUFS2   | 1.97E-05 | ././benign/././././10.64                                      | .             |
| 1:161330269A>G    | rs571270748  | ALS7_5610             | SDHC     | 1.97E-05 | ././benign/././././10.02                                      | .             |
| 1:165675863T>C    | rs552342371  | ALS7_5610             | ALDH9A1  | 0.000217 | ././benign/././././11.53                                      | .             |
| 1:165680614C>G    | rs1065756    | ALS3_536              | ALDH9A1  | 0.017599 | tolerated/benign/benign/./0/0.001/1/-0.395/T/11.50            | .             |
| 1:167880620G>A    | rs146573590  | ALS8_5611             | ADCY10   | 0.007983 | ././benign/././././16.21                                      | .             |
| 1:167924321A>G    | rs143704144  | ALS3_536              | MPC2     | 9.2E-05  | ././benign/././././14.82                                      | .             |
| 1:167938112A>G    | rs556318456  | ALS6_5609             | MPC2     | 0.000158 | ././benign/././././10.78                                      | .             |
| 1:167944301A>G    | rs1277515226 | ALS7_5610             | DCAF6    | 3.28E-05 | ././benign/././././15.51                                      | .             |
| 1:173835452T>C    | rs1036874881 | ALS7_5610             | DARS2    | 0.000749 | ././benign/././././10.70                                      | .             |
| 1:220137982T>C    | rs1488422152 | ALS8_5611             | IARS2    | 2.63E-05 | tolerated/benign/pathogenic/./0.515/0.356/0.995/1.615/T/22.0  | .             |
| 1:226990226CT>C   | .            | ALS8_5611             | COQ8A    | 0        | ./././././././11.24                                           | .             |
| 1:228157738A>G    | rs1571907281 | ALS6_5609             | GJC2     | 3.39E-05 | ././pathogenic/././././31                                     | .             |
| 1:234373657C>G    | rs117011051  | ALS8_5611             | COA6     | 0.00433  | tolerated/benign/benign/Benign/./1/./T/12.28                  | not_specified |
| 2:26223716C>T     | rs572122315  | ALS3_536              | HADHA    | 0.00248  | ././benign/././././12.68                                      | .             |
| 2:43967464G>A     | rs1346113357 | ALS2_503              | LRPPRC   | 2.63E-05 | ././benign/././././11.84                                      | .             |
| 2:44312539A>G     | .            | ALS7_5610             | PREPL    | 0        | ././benign/././././14.51                                      | .             |
| 2:55669490T>C     | rs112939231  | ALS4_539              | PNPT1    | 0.005544 | ././benign/././././13.17                                      | .             |
| 2:69389670A>G     | rs144607557  | ALS7_5610             | GFPT1    | 0.00452  | ././benign/././././12.72                                      | .             |
| 2:72893070A>C     | .            | ALS8_5611             | SPR      | 0.000349 | ././benign/././././10.42                                      | .             |
| 2:72934354G>C     | rs569604109  | ALS8_5611             | EMX1     | 0.001281 | ././benign/././././12.26                                      | .             |
| 2:72940760G>T     | .            | ALS4_539              | SFXN5    | 0        | ././benign/././././10.33                                      | .             |
| 2:72948099G>A     | rs183314214  | ALS6_5609             | SFXN5    | 0.000118 | ././benign/././././16.77                                      | .             |
| 2:72972747C>A     | rs72918389   | ALS6_5609             | SFXN5    | 0.002826 | ././benign/././././16.80                                      | .             |
| 2:72972962T>C     | rs750429330  | ALS1_497              | SFXN5    | 0.000178 | ././benign/././././18.44                                      | .             |
| 2:73020681T>C     | rs927706146  | ALS6_5609             | SFXN5    | 3.28E-05 | ././benign/././././10.93                                      | .             |
| 2:74206108T>C     | rs762916557  | ALS4_539              | MTHFD2   | 0.000223 | ././benign/././././12.61                                      | .             |
| 2:74538538G>A     | rs556244881  | ALS5_5608             | LOXL3    | 0.000171 | ././benign/././././14.52                                      | .             |
| 2:74539441A>C     | rs538765615  | ALS4_539              | LOXL3    | 0.000211 | ././benign/././././11.22                                      | .             |
| 2:86121020T>C     | rs146520394  | ALS2_503              | PTCD3    | 0.006201 | ././benign/././././10.04                                      | .             |
| 2:86183689A>G     | rs188548908  | ALS7_5610             | IMMT     | 0.003864 | ././benign/././././10.30                                      | .             |
| 2:86207193G>A     | rs1132002    | ALS1_497              | MRPL35   | 0.00545  | deleterious/benign/benign/./0.585/0.022/0.985/0/T/17.27       | .             |

|                  |              |                        |                |          |                                                       |   |
|------------------|--------------|------------------------|----------------|----------|-------------------------------------------------------|---|
| 2:88692002G>A    | rs114563957  | ALS8_5611              | RPIA           | 0.004541 | ././benign/././././13.22                              | . |
| 2:88719378C>T    | rs146913994  | ALS3_536               | RPIA           | 0.000776 | ././benign/././././10.17                              | . |
| 2:99170686GTTA>G | rs770728381  | ALS5_5608              | MITD1          | 0.001113 | ././././././10.12                                     | . |
| 2:99171684A>T    | rs188688938  | ALS4_539               | MITD1          | 0.005245 | ././benign/././././16.94                              | . |
| 2:105044506A>G   | rs181081347  | ALS6_5609              | MRPS9          | 0.005906 | ././benign/././././13.77                              | . |
| 2:156435440GT>G  | rs1175590351 | ALS2_503               | GPD2           | 0.001257 | ././Warning/././././12.50                             | . |
| 2:156435440G>GT  | rs1175590351 | ALS4_539               | GPD2           | 0.015446 | ././No/././././11.55                                  | . |
| 2:156478574A>G   | rs530917614  | ALS1_497               | GPD2           | 0.000539 | ././pathogenic/././././21.4                           | . |
| 2:156486542T>C   | rs1265401970 | ALS2_503               | GPD2           | 6.57E-06 | ././benign/././././15.64                              | . |
| 2:156490402C>A   | rs990459934  | ALS4_539               | GPD2           | 0.021609 | ././benign/././././14.37                              | . |
| 2:156505004TG>T  | rs150979484  | ALS1_497;<br>ALS5_5608 | GPD2           | 0.006446 | ././././././18.57                                     | . |
| 2:169564865C>T   | rs150820555  | ALS4_539               | FASTKD1        | 0.001845 | ././benign/././././10.69                              | . |
| 2:171318334A>G   | rs778098624  | ALS3_536               | METTL8         | 0.000217 | ././benign/././././12.60                              | . |
| 2:171342223C>T   | rs142698957  | ALS8_5611              | METTL8         | 0.004153 | ././benign/././././15.29                              | . |
| 2:171364677A>AAC | rs150877885  | ALS1_497               | METTL8         | 0.000844 | ././././././11.03                                     | . |
| 2:171420719A>G   | rs143080157  | ALS3_536               | METTL8         | 0.003601 | ././benign/././././12.64                              | . |
| 2:171844803G>A   | rs190065215  | ALS4_539               | SLC25A12       | 0.002798 | ././benign/././././12.16                              | . |
| 2:171845382CA>C  | rs879467144  | ALS1_497               | SLC25A12       | 0.003816 | ././././././13.52                                     | . |
| 2:172034159A>G   | rs764308989  | ALS6_5609              | METAP1D        | 0.000217 | ././benign/././././14.33                              | . |
| 2:172051612T>G   | rs760225350  | ALS6_5609              | METAP1D        | 5.91E-05 | ././pathogenic/././././20.4                           | . |
| 2:172083299G>A   | rs529891603  | ALS8_5611              | METAP1D        | 0.002765 | ././pathogenic/././././18.73                          | . |
| 2:172083300C>T   | rs549758464  | ALS8_5611              | METAP1D        | 0.002765 | ././pathogenic/././././19.07                          | . |
| 2:172083932A>C   | rs113835394  | ALS8_5611              | METAP1D        | 0.002766 | ././pathogenic/././././20.5                           | . |
| 2:176269658C>A   | rs551177944  | ALS5_5608              | MTX2           | 0        | tolerated/benign/benign/./0.694/0.26/0.997/1.5/T/23.0 | . |
| 2:176275241AT>A  | rs200488729  | ALS4_539               | MTX2           | 0.001537 | ././././././13.33                                     | . |
| 2:176297189A>G   | rs116078454  | ALS4_539               | MTX2           | 0.004791 | ././pathogenic/././././14.50                          | . |
| 2:176316813T>C   | rs138082266  | ALS8_5611              | MTX2           | 0.006328 | ././benign/././././10.36                              | . |
| 2:176328829C>T   | rs146164822  | ALS8_5611              | MTX2           | 0.0025   | ././benign/././././10.98                              | . |
| 2:190946396A>G   | rs145921383  | ALS1_497;<br>ALS7_5610 | GLS            | 0.004066 | ././benign/././././12.98                              | . |
| 2:190965282C>T   | rs149993422  | ALS2_503               | GLS            | 0.003637 | ././benign/././././13.35                              | . |
| 2:197714037CTT>C | rs1234584171 | ALS2_503               | AC011997.<br>1 | 1.31E-05 | ././././././13.98                                     | . |
| 2:199951517A>G   | rs190851356  | ALS4_539               | MAIP1          | 0.002253 | ././benign/././././13.13                              | . |
| 2:200886117T>C   | rs561235556  | ALS4_539               | NIF3L1         | 0.00557  | ././benign/././././11.67                              | . |
| 2:201067811C>A   | rs184374950  | ALS6_5609              | NDUFB3         | 0.001951 | ././benign/././././10.88                              | . |
| 2:201250042G>A   | rs149077413  | ALS7_5610              | CASP8          | 0.003147 | ././benign/././././13.79                              | . |
| 2:206769412T>C   | rs1248442679 | ALS2_503               | FASTKD2        | 0        | ././benign/././././13.25                              | . |
| 2:210216311T>G   | rs189433918  | ALS8_5611              | ACADL          | 0.002279 | ././benign/././././13.25                              | . |
| 2:210538114C>A   | rs541778789  | ALS2_503               | CPS1           | 1.97E-05 | ././benign/././././13.03                              | . |

|                 |              |                       |          |          |                                                                       |                                                                                    |
|-----------------|--------------|-----------------------|----------|----------|-----------------------------------------------------------------------|------------------------------------------------------------------------------------|
| 2:210601647T>A  | rs148720484  | ALS6_5609             | CPS1     | 0.004725 | ././benign/././././20.8                                               | .                                                                                  |
| 2:218270141T>A  | rs147309598  | ALS1_497              | PNKD     | 0.005099 | ././benign/Likely_benign/././././18.40                                | not_provided                                                                       |
| 2:218270142C>A  | rs140903641  | ALS1_497              | PNKD     | 0.005097 | ././benign/Likely_benign/././././19.35                                | not_provided                                                                       |
| 2:218350493T>C  | .            | ALS7_5610             | PNKD     | 0        | ././benign/././././11.16                                              | .                                                                                  |
| 2:218661173G>C  | .            | ALS1_497              | BCS1L    | 0        | deleterious/probably_damaging/pathogenic/./0.999/0.986/1/3.495/D/29.9 | .                                                                                  |
| 2:218671266C>CT | rs35556340   | ALS1_497;<br>ALS3_536 | RNF25    | 0.002663 | ./././././././12.74                                                   | .                                                                                  |
| 2:218796543G>A  | rs920145015  | ALS2_503              | CYP27A1  | 1.98E-05 | ././benign/./././././10.73                                            | .                                                                                  |
| 2:223951094G>A  | rs1471120125 | ALS4_539              | MRPL44   | 6.57E-06 | ././benign/./././././10.45                                            | .                                                                                  |
| 2:223965292A>T  | rs768455846  | ALS2_503              | MRPL44   | 0.000315 | ././benign/./././././12.55                                            | .                                                                                  |
| 2:227986002A>G  | rs180935455  | ALS1_497              | SPHKAP   | 0.003188 | ././benign/./././././10.52                                            | .                                                                                  |
| 2:228078761C>T  | rs75112508   | ALS1_497              | SPHKAP   | 0.006613 | ././benign/./././././10.95                                            | .                                                                                  |
| 2:228087235T>C  | rs56349157   | ALS5_5608             | SPHKAP   | 0.003898 | ././benign/./././././10.09                                            | .                                                                                  |
| 2:228122053T>G  | rs181669173  | ALS3_536              | SPHKAP   | 0.001736 | ././benign/./././././10.78                                            | .                                                                                  |
| 2:240029762A>G  | rs61730686   | ALS5_5608             | NDUFA10  | 0.005045 | ././benign/./0.015/0.04/1/2.31/T/15.29                                | .                                                                                  |
| 2:241735267C>G  | rs4675887    | ALS4_539              | D2HGDH   | 0.0084   | tolerated/benign/benign/Benign/Likely_benign/0/0/1/1.355/T/15.29      | D-2-hydroxyglutaric_aciduria_1 not_specified not_provided                          |
| 2:241815120G>A  | rs116702646  | ALS6_5609             | NEU4     | 0.005376 | tolerated/benign/benign/./0.282/0.023/0.879/0.92/T/16.99              | .                                                                                  |
| 3:3132900A>C    | rs939195240  | ALS8_5611             | TRNT1    | 6.57E-06 | ././benign/./././././12.21                                            | .                                                                                  |
| 3:3140565G>A    | .            | ALS7_5610             | TRNT1    | 0        | deleterious/probably_damaging/pathogenic/./0.992/0.901/1/2.715/T/29.4 | .                                                                                  |
| 3:9745596G>A    | rs775839026  | ALS2_503              | OGG1     | 1.97E-05 | ././pathogenic/./0.997/0.947/1/2.28/T/25.1                            | .                                                                                  |
| 3:9746037G>C    | rs141075845  | ALS5_5608             | OGG1     | 0.002254 | ././benign/./././././10.73                                            | .                                                                                  |
| 3:14132869C>CT  | rs1423539317 | ALS8_5611             | TMEM43   | 3.29E-05 | ./././Uncertain_significance/././././32                               | Cardiomyopathy Arrhythmogenic_right_ventricular_cardiomyopathy_type_5 not_provided |
| 3:16293401A>C   | rs926651950  | ALS5_5608             | OXNAD1   | 2.63E-05 | ././benign/./././././11.73                                            | .                                                                                  |
| 3:44339202A>G   | rs184704981  | ALS5_5608             | TCAIM    | 0.002939 | ././benign/./././././10.78                                            | .                                                                                  |
| 3:45407312G>C   | rs148769133  | ALS8_5611             | LARS2    | 0.003055 | ././benign/./././././15.82                                            | .                                                                                  |
| 3:45431711A>AG  | rs890428009  | ALS4_539              | LARS2    | 0.000171 | ./././././././11.72                                                   | .                                                                                  |
| 3:47853178G>C   | rs745990474  | ALS2_503              | DHX30    | 0.000164 | ././pathogenic/./0.994/0.951/1/0.975/T/25.7                           | .                                                                                  |
| 3:48310223A>T   | rs1158963060 | ALS4_539              | SPINK8   | 1.31E-05 | ././benign/./././././10.16                                            | .                                                                                  |
| 3:48428803G>C   | rs1207857528 | ALS2_503              | CCDC51   | 0.000145 | ././benign/./././././11.28                                            | .                                                                                  |
| 3:48429110C>T   | rs145842830  | ALS1_497              | CCDC51   | 0.003771 | ././benign/./././././12.98                                            | .                                                                                  |
| 3:48433150C>T   | rs373488371  | ALS6_5609             | CCDC51   | 0.000131 | deleterious/probably_damaging/pathogenic/./1/0.987/1/2.625/T/25.6     | .                                                                                  |
| 3:48898874C>G   | rs551279923  | ALS7_5610             | SLC25A20 | 5.91E-05 | ././benign/Uncertain_significance/././././17.02                       | Carnitine_acylcarnitine_translocase_deficiency                                     |
| 3:50567652T>G   | .            | ALS7_5610             | HEMK1    | 0        | ././benign/./././././10.63                                            | .                                                                                  |

|                               |              |           |          |          |                                                                            |              |
|-------------------------------|--------------|-----------|----------|----------|----------------------------------------------------------------------------|--------------|
| 3:50591029G>T                 | .            | ALS4_539  | HEMK1    | 0        | ././benign/././././12.97                                                   | .            |
| 3:52199279G>A                 | rs35338461   | ALS4_539  | ALAS1    | 0.003801 | tolerated/possibly_damaging/pathogenic/Benign/0.895/<br>0.473/1/2.3/D/24.4 | not_provided |
| 3:52282481T>G                 | rs576751965  | ALS3_536  | GLYCTK   | 0.000848 | ././benign/././././10.38                                                   | .            |
| 3:52516421G>A                 | rs201671103  | ALS1_497  | STAB1    | 0.00021  | tolerated/possibly_damaging/benign/./0.997/0.66/1/1.56<br>5/T/22.9         | .            |
| 3:52520515G>A                 | rs147953260  | ALS1_497  | NT5DC2   | 0.000985 | ././pathogenic/Likely_benign/0.979/0.512/1/2.33/D/24.6                     | not_provided |
| 3:53843065C>A                 | rs150555921  | ALS8_5611 | CHDH     | 0.002862 | ././benign/././././12.80                                                   | .            |
| 3:57556300C>T                 | rs190633425  | ALS7_5610 | PDE12    | 0.005248 | ././benign/././././10.13                                                   | .            |
| 3:57571523T>C                 | rs192919441  | ALS7_5610 | PDE12    | 0.005238 | ././pathogenic/././././16.40                                               | .            |
| 3:59789620A>G                 | rs114287574  | ALS8_5611 | FHIT     | 0.001734 | ././benign/././././11.84                                                   | .            |
| 3:59794176C>T                 | rs139077383  | ALS3_536  | FHIT     | 0.005415 | ././benign/././././17.87                                                   | .            |
| 3:59861866GA>G                | rs369230614  | ALS4_539  | FHIT     | 0.017248 | ./././././10.62                                                            | .            |
| 3:59867383A>G                 | rs769811679  | ALS4_539  | FHIT     | 0.000329 | ././benign/././././13.48                                                   | .            |
| 3:59878078G>GA                | rs767721160  | ALS2_503  | FHIT     | 4.6E-05  | ./././././12.55                                                            | .            |
| 3:59887896T>C                 | rs1222460498 | ALS8_5611 | FHIT     | 1.31E-05 | ././benign/././././13.20                                                   | .            |
| 3:60011227A>T                 | rs1468912318 | ALS4_539  | FHIT     | 1.31E-05 | ././pathogenic/././././16.17                                               | .            |
| 3:60250391T>C                 | rs138427963  | ALS2_503  | FHIT     | 0.000959 | ././benign/././././10.99                                                   | .            |
| 3:60284198A>G                 | rs145602499  | ALS5_5608 | FHIT     | 0.002465 | ././benign/././././16.89                                                   | .            |
| 3:60316043T>C                 | rs140683423  | ALS1_497  | FHIT     | 0.002621 | ././pathogenic/././././10.64                                               | .            |
| 3:60355328T>C                 | rs142232005  | ALS6_5609 | FHIT     | 0.000992 | ././benign/././././15.43                                                   | .            |
| 3:60406519T>C                 | rs185430740  | ALS2_503  | FHIT     | 0.005461 | ././pathogenic/././././21.3                                                | .            |
| 3:60421116A>G                 | rs757733394  | ALS8_5611 | FHIT     | 0.000127 | ././benign/././././19.47                                                   | .            |
| 3:60452624T>G                 | rs1447302941 | ALS2_503  | FHIT     | 1.31E-05 | ././benign/././././16.12                                                   | .            |
| 3:60452642T>A                 | rs145290628  | ALS6_5609 | FHIT     | 0.001537 | ././benign/././././10.96                                                   | .            |
| 3:60543403G>A                 | rs1234978919 | ALS6_5609 | FHIT     | 1.31E-05 | ././benign/././././11.18                                                   | .            |
| 3:60568759CAGCTC<br>TTAGTCA>C | rs948881765  | ALS2_503  | FHIT     | 7.89E-05 | ./././././16.07                                                            | .            |
| 3:60598710G>C                 | rs9864591    | ALS2_503  | FHIT     | 0.026826 | ././benign/././././13.84                                                   | .            |
| 3:60598999G>C                 | rs9868743    | ALS2_503  | FHIT     | 0.026832 | ././pathogenic/././././15.72                                               | .            |
| 3:60610497T>C                 | .            | ALS8_5611 | FHIT     | 0        | ././benign/././././13.72                                                   | .            |
| 3:60948968A>G                 | rs73100071   | ALS6_5609 | FHIT     | 0.005004 | ././benign/././././16.41                                                   | .            |
| 3:60984343A>G                 | .            | ALS7_5610 | FHIT     | 0        | ././benign/././././13.83                                                   | .            |
| 3:61031322C>G                 | rs138747732  | ALS5_5608 | FHIT     | 0.004016 | ././benign/././././12.20                                                   | .            |
| 3:61129825G>T                 | rs145066586  | ALS2_503  | FHIT     | 0.004666 | ././benign/././././17.63                                                   | .            |
| 3:61141516A>AAAT<br>CCG       | rs1553852573 | ALS3_536  | FHIT     | 0.00264  | ./././././14.60                                                            | .            |
| 3:61251341G>T                 | rs114542366  | ALS3_536  | FHIT     | 0.004158 | ././pathogenic/././././14.08                                               | .            |
| 3:66124886A>C                 | rs539393734  | ALS5_5608 | SLC25A26 | 0.000519 | ././benign/././././10.71                                                   | .            |
| 3:66299969T>C                 | .            | ALS7_5610 | SLC25A26 | 0        | ././benign/././././13.34                                                   | .            |

|                  |              |                        |          |          |                                                                                           |              |
|------------------|--------------|------------------------|----------|----------|-------------------------------------------------------------------------------------------|--------------|
| 3:66300065A>T    | rs1033438858 | ALS6_5609              | SLC25A26 | 0.00092  | ././benign/././././20.0                                                                   | .            |
| 3:66317204C>T    | rs756371413  | ALS7_5610              | SLC25A26 | 0.00023  | ././benign/././././13.09                                                                  | .            |
| 3:66379482A>G    | rs545224126  | ALS5_5608              | SLC25A26 | 0.00069  | ././benign/././././10.12                                                                  | .            |
| 3:67466881C>T    | rs775816086  | ALS4_539               | SUCLG2   | 0.00023  | ././benign/././././11.22                                                                  | .            |
| 3:67630323A>T    | rs771652386  | ALS4_539               | SUCLG2   | 0.00023  | ././benign/././././11.66                                                                  | .            |
| 3:94132250G>A    | rs929150015  | ALS3_536               | NSUN3    | 1.31E-05 | ././pathogenic/././././20.4                                                               | .            |
| 3:111986079T>C   | rs528364656  | ALS8_5611              | ABHD10   | 7.9E-05  | ././benign/././././14.51                                                                  | .            |
| 3:120587620A>G   | rs1480214483 | ALS5_5608              | NDUFB4   | 6.57E-06 | ././pathogenic/././././19.39                                                              | .            |
| 3:121436272C>T   | rs3218635    | ALS1_497               | POLQ     | 0.000335 | deleterious/probably_damaging/pathogenic/Uncertain_<br>significance/1/0.999/1/2.67/D/28.1 | not_provided |
| 3:121466859GAT>G | rs1182682163 | ALS1_497               | POLQ     | 1.97E-05 | ././././././17.56                                                                         | .            |
| 3:122363244A>C   | rs536915182  | ALS3_536               | CCDC58   | 0.001209 | ././benign/././././11.87                                                                  | .            |
| 3:122414868T>G   | rs149616840  | ALS7_5610              | FAM162A  | 1.97E-05 | ././pathogenic/./1/0.999/1/1.985/T/25.5                                                   | .            |
| 3:126123001T>C   | rs151184213  | ALS6_5609              | ALDH1L1  | 0.002274 | ././benign/././././13.98                                                                  | .            |
| 3:126160912C>T   | rs143122118  | ALS4_539               | ALDH1L1  | 0.003934 | deleterious/probably_damaging/pathogenic/Benign/1/1<br>/1/2.725/D/25.8                    | not_provided |
| 3:126171095A>G   | rs147639189  | ALS1_497               | ALDH1L1  | 0.049269 | ././benign/././././10.26                                                                  | .            |
| 3:126704269C>T   | rs6804224    | ALS1_497               | CHCHD6   | 0.0244   | ././benign/././././14.77                                                                  | .            |
| 3:126704270C>A   | rs6804225    | ALS1_497               | CHCHD6   | 0.0244   | ././benign/././././13.38                                                                  | .            |
| 3:126710673T>G   | rs184176975  | ALS3_536;<br>ALS8_5611 | CHCHD6   | 0.004054 | ././benign/././././11.28                                                                  | .            |
| 3:126723891C>T   | rs115316240  | ALS3_536               | CHCHD6   | 0.004556 | ././benign/././././15.39                                                                  | .            |
| 3:126736581AT>A  | rs768872534  | ALS6_5609              | CHCHD6   | 0.000644 | ././././././11.11                                                                         | .            |
| 3:126762575A>G   | rs112444343  | ALS8_5611              | CHCHD6   | 6.57E-05 | ././benign/././././10.60                                                                  | .            |
| 3:136322892T>C   | rs183256104  | ALS2_503               | PCCB     | 0.001715 | ././benign/././././13.25                                                                  | .            |
| 3:139607837C>T   | rs988013236  | ALS3_536               | NMNAT3   | 0        | ././benign/././././16.66                                                                  | .            |
| 3:158671006C>T   | rs115108034  | ALS8_5611              | GFM1     | 0.00692  | ././benign/Benign/0/0/1/1.15/T/13.06                                                      | not_provided |
| 3:179624018C>T   | rs200889798  | ALS6_5609              | NDUFB5   | 0.000131 | tolerated/possibly_damaging/benign/./0.097/0.073/0.999<br>/2.83/T/22.5                    | .            |
| 3:180975427GT>G  | rs34318725   | ALS3_536;<br>ALS4_539  | FXR1     | 0.001152 | ././Warning/././././15.03                                                                 | .            |
| 3:183027754T>G   | rs757603193  | ALS8_5611              | MCCC1    | 0.001051 | ././benign/././././10.74                                                                  | .            |
| 3:193618721T>TA  | rs550849134  | ALS4_539               | OPA1     | 0.000368 | ././././././13.19                                                                         | .            |
| 3:193674381T>C   | rs574283226  | ALS4_539               | OPA1     | 0.00025  | ././benign/././././13.09                                                                  | .            |
| 3:197555663C>G   | rs147953473  | ALS3_536               | BDH1     | 0.006097 | ././benign/././././11.98                                                                  | .            |
| 4:2065819CTG>C   | rs781062846  | ALS5_5608              | NAT8L    | 0.000204 | ././././././15.31                                                                         | .            |
| 4:17577460G>A    | rs13123846   | ALS6_5609              | LAP3     | 0.000368 | ././pathogenic/././././18.84                                                              | .            |
| 4:42005832A>T    | rs188182814  | ALS1_497               | SLC30A9  | 0.000801 | ././benign/././././16.08                                                                  | .            |
| 4:48842106A>C    | rs954310196  | ALS8_5611              | OCIAD1   | 6.57E-06 | ././benign/././././13.91                                                                  | .            |
| 4:48857303C>T    | rs112327139  | ALS2_503               | OCIAD1   | 0.003373 | deleterious/benign/pathogenic/./0.162/0.045/1/0/T/23.3                                    | .            |

|                           |              |                                    |               |          |                                                                  |   |
|---------------------------|--------------|------------------------------------|---------------|----------|------------------------------------------------------------------|---|
| 4:56964489G>A             | rs138345362  | ALS5_5608                          | NOA1          | 0.002243 | deleterious/probably_damaging/pathogenic/.1/0.999/1/4.025/T/26.1 | . |
| 4:70809218CA>C            | rs777261323  | ALS1_497;<br>ALS2_503;<br>ALS4_539 | MTHFD2L       | 0.003714 | ./././././././13.26                                              | . |
| 4:74230886G>A             | rs143361111  | ALS8_5611                          | MTHFD2L       | 0.004353 | ././benign/././././15.91                                         | . |
| 4:74307302G>A             | .            | ALS1_497                           | MTHFD2L       | 0        | ././benign/././././19.40                                         | . |
| 4:77896963AATTCT<br>TTC>A | rs201963250  | ALS5_5608                          | MRPL1         | 0.005892 | ././././././14.69                                                | . |
| 4:77923581C>G             | rs144348470  | ALS6_5609                          | MRPL1         | 0.007574 | ././benign/././././12.08                                         | . |
| 4:77949867C>T             | rs137874988  | ALS1_497                           | MRPL1         | 0.000105 | deleterious/probably_damaging/benign/.1/0.972/1/2.445/T/25.7     | . |
| 4:109605120A>G            | rs745996652  | ALS3_536                           | MCUB          | 0.00046  | ././benign/././././13.84                                         | . |
| 4:122883553G>A            | rs189576239  | ALS6_5609;<br>ALS7_5610            | FGF2          | 0.003851 | ././benign/././././10.41                                         | . |
| 4:127744218G>T            | rs116441649  | ALS2_503                           | SLC25A31      | 0.005128 | ././benign/././././11.02                                         | . |
| 4:139040927G>A            | rs912870142  | ALS8_5611                          | NOCT          | 0.000132 | ././benign/././././13.14                                         | . |
| 4:139299974G>A            | rs144920917  | ALS1_497                           | NDUFC1        | 0.002662 | ././benign/././././10.97                                         | . |
| 4:151712371C>T            | rs77139350   | ALS8_5611                          | GATB          | 0.003883 | ././benign/././././17.36                                         | . |
| 4:184630850A>G            | rs564549833  | ALS2_503                           | CASP3         | 0.00069  | ././benign/././././10.81                                         | . |
| 4:184756015C>T            | rs562295208  | ALS2_503                           | ACSL1         | 0.00048  | ././benign/././././15.77                                         | . |
| 4:185134437T>C            | rs1188756713 | ALS2_503                           | NA            | 0        | ././benign/././././10.44                                         | . |
| 5:36209771T>C             | rs908829844  | ALS8_5611                          | NADK2         | 6.57E-06 | ././benign/././././12.50                                         | . |
| 5:36231804T>C             | rs185791886  | ALS7_5610                          | NADK2         | 0.000683 | ././benign/././././10.24                                         | . |
| 5:41727118G>A             | rs143464951  | ALS1_497                           | OXCT1         | 0.004004 | ././benign/././././15.04                                         | . |
| 5:41795015C>T             | rs144963931  | ALS5_5608                          | OXCT1         | 0.002063 | ././benign/././././10.87                                         | . |
| 5:41861521A>T             | rs141686747  | ALS2_503                           | OXCT1         | 0.000834 | ././benign/././././17.37                                         | . |
| 5:41875624A>T             | rs1184193565 | ALS7_5610                          | OXCT1-<br>AS1 | 1.31E-05 | ././benign/././././14.58                                         | . |
| 5:43651183G>A             | rs184982634  | ALS1_497                           | NNT           | 0.001363 | ././benign/././././15.12                                         | . |
| 5:44808996C>A             | rs112901974  | ALS8_5611                          | MRPS30        | 0.001859 | tolerated/benign/benign/.0.71/0.313/1/2.34/T/16.15               | . |
| 5:53690955A>G             | .            | ALS5_5608                          | NDUFS4        | 6.57E-06 | ././benign/././././14.02                                         | . |
| 5:56934376T>C             | rs550394008  | ALS8_5611                          | MIER3         | 0.000243 | ././benign/././././10.22                                         | . |
| 5:61048145A>G             | rs751050690  | ALS2_503                           | NDUFAF2       | 8.55E-05 | ././benign/././././10.73                                         | . |
| 5:65754225T>C             | rs16894294   | ALS5_5608                          | NLN           | 0.00853  | ././benign/././././11.33                                         | . |
| 5:71638343C>T             | rs186273368  | ALS7_5610                          | MCCC2         | 0.004442 | ././benign/././././10.17                                         | . |
| 5:72209520G>GA            | rs878901158  | ALS2_503                           | MAP1B         | 0.001776 | ././././././14.53                                                | . |
| 5:72217396G>A             | rs1053508166 | ALS5_5608                          | MRPS27        | 1.97E-05 | ././benign/././././14.46                                         | . |
| 5:72242428GA>G            | rs750987632  | ALS4_539                           | MRPS27        | 0.001159 | ././././././10.50                                                | . |
| 5:72275097T>C             | rs754220252  | ALS2_503                           | MRPS27        | 0.001314 | ././benign/././././10.56                                         | . |
| 5:78998322T>G             | rs185395937  | ALS2_503                           | DMGDH         | 0.000756 | ././benign/././././10.52                                         | . |

|                                            |              |           |                |          |                                                                                     |                                                           |
|--------------------------------------------|--------------|-----------|----------------|----------|-------------------------------------------------------------------------------------|-----------------------------------------------------------|
| 5:79013528A>G                              | rs116702331  | ALS8_5611 | DMGDH          | 0.003904 | ././benign/././././10.79                                                            | .                                                         |
| 5:79044326C>T                              | rs139044238  | ALS2_503  | DMGDH          | 0.000887 | ././benign/Conflicting_interpretations_of_pathogenicity<br>././1/././40             | Dimethylglycine_dehydrogenase_<br>deficiency not_provided |
| 5:126595278A>C                             | rs563928852  | ALS1_497  | ALDH7A1        | 0.003084 | ././benign/Conflicting_interpretations_of_pathogenicity<br>/0.012/0.008/1/./T/17.84 | Pyridoxine-<br>dependent_epilepsy not_provide<br>d        |
| 5:127061996T>C                             | rs116162582  | ALS4_539  | C5orf63        | 0.000158 | ././benign/././././14.79                                                            | .                                                         |
| 5:131208871T>A                             | rs997591800  | ALS7_5610 | LYRM7          | 3.29E-05 | ././benign/././././15.12                                                            | .                                                         |
| 5:131997947G>A                             | rs767394745  | ALS8_5611 | ACSL6          | 2.63E-05 | ././benign/././././16.74                                                            | .                                                         |
| 5:132015504TA>T                            | rs771045372  | ALS2_503  | AC034228.<br>2 | 0.000887 | ././././././12.35                                                                   | .                                                         |
| 5:133983468A>G                             | rs74762551   | ALS3_536  | VDAC1          | 0.004148 | ././benign/././././15.17                                                            | .                                                         |
| 5:133991168A>G                             | rs766212922  | ALS2_503  | VDAC1          | 1.31E-05 | ././benign/././././16.43                                                            | .                                                         |
| 5:140657125C>T                             | rs1461096690 | ALS8_5611 | IK             | 1.31E-05 | ././benign/././././10.64                                                            | .                                                         |
| 5:141923217A>G                             | rs558291156  | ALS4_539  | DELE1          | 0.000716 | ././benign/././././12.66                                                            | .                                                         |
| 5:141924071G>A                             | rs570254184  | ALS6_5609 | DELE1          | 0.000795 | ././benign/././././14.52                                                            | .                                                         |
| 5:145753221GGCTG<br>CTATTTTCTCTCT<br>GCT>G | rs562806501  | ALS5_5608 | PRELID2        | 0.006962 | ././././././16.26                                                                   | .                                                         |
| 5:145800593G>T                             | rs768856904  | ALS4_539  | PRELID2        | 3.29E-05 | ././benign/././././15.39                                                            | .                                                         |
| 5:145801452C>G                             | rs142521367  | ALS3_536  | PRELID2        | 0.002497 | ././benign/././././11.50                                                            | .                                                         |
| 5:145835260G>GCC<br>GCGGGCCCCGCG<br>CA     | rs749870614  | ALS5_5608 | PRELID2        | 0.003803 | ././././././10.60                                                                   | .                                                         |
| 5:154938231G>A                             | rs983356481  | ALS1_497  | MRPL22         | 7.88E-05 | ././benign/././././15.48                                                            | .                                                         |
| 5:177302011C>T                             | rs376678813  | ALS4_539  | RAB24          | 7.23E-05 | ././benign/././././15.18                                                            | .                                                         |
| 6:3152060C>G                               | rs569185118  | ALS8_5611 | BPHL           | 0.000769 | ././benign/././././11.05                                                            | .                                                         |
| 6:5564222G>A                               | rs192624970  | ALS1_497  | FARS2          | 0.002478 | ././benign/././././11.18                                                            | .                                                         |
| 6:5631272A>G                               | .            | ALS4_539  | FARS2          | 0        | ././benign/././././15.77                                                            | .                                                         |
| 6:13615497G>A                              | .            | ALS8_5611 | SIRT5          | 0        | ././benign/./0.778/0.083/0.554/1.1/T/24.7                                           | .                                                         |
| 6:30617265A>G                              | rs533548299  | ALS6_5609 | MRPS18B        | 0.00224  | ././benign/././././19.25                                                            | .                                                         |
| 6:30617305G>A                              | rs528193181  | ALS2_503  | MRPS18B        | 0.002365 | ././pathogenic/././././19.20                                                        | .                                                         |
| 6:30637367C>CT                             | rs769594150  | ALS1_497  | ATAT1          | 0.003905 | ././././././10.96                                                                   | .                                                         |
| 6:30644142A>G                              | .            | ALS6_5609 | C6orf136       | 0        | ././benign/././././21.2                                                             | .                                                         |
| 6:33688111CAGG>C                           | rs757436464  | ALS6_5609 | ITPR3          | 0.001091 | ././././././18.88                                                                   | .                                                         |
| 6:33697267G>T                              | rs779010521  | ALS7_5610 | UQCC2          | 5.91E-05 | ././benign/././././15.50                                                            | .                                                         |
| 6:39897231T>C                              | rs61748650   | ALS8_5611 | MOCS1          | 0.003963 | ././pathogenic/./0.544/0.343/1/1.485/T/22.6                                         | .                                                         |
| 6:42225005A>G                              | rs190167403  | ALS8_5611 | TRERF1         | 0.005086 | ././benign/././././15.04                                                            | .                                                         |
| 6:44313205G>C                              | rs778971317  | ALS8_5611 | AARS2          | 6.57E-06 | deleterious/benign/benign/./0.953/0.366/1/0/T/22.3                                  | .                                                         |
| 6:46653111G>A                              | rs906344645  | ALS7_5610 | SLC25A27       | 2.63E-05 | ././benign/././././10.51                                                            | .                                                         |

|                       |              |                        |         |          |                                                                                       |                                                                                        |
|-----------------------|--------------|------------------------|---------|----------|---------------------------------------------------------------------------------------|----------------------------------------------------------------------------------------|
| 6:49472903A>G         | rs751354871  | ALS3_536               | CENPQ   | 0        | ././benign/././././10.88                                                              | .                                                                                      |
| 6:73452132G>C         | rs147035222  | ALS1_497               | CGAS    | 0.00446  | tolerated/benign/benign/Likely_benign/0.014/0.004/1/1.<br>67/T/10.48                  | not_provided                                                                           |
| 6:80152041T>C         | rs17808284   | ALS4_539               | BCKDHB  | 0.004783 | ././pathogenic/././././19.54                                                          | .                                                                                      |
| 6:80180347A>G         | rs780633715  | ALS2_503               | BCKDHB  | 3.28E-05 | ././benign/././././10.60                                                              | .                                                                                      |
| 6:80299529C>G         | rs543075053  | ALS2_503               | BCKDHB  | 0.000184 | ././benign/././././10.51                                                              | .                                                                                      |
| 6:80327325C>T         | rs559991659  | ALS1_497               | BCKDHB  | 0.001117 | ././benign/././././10.97                                                              | .                                                                                      |
| 6:80346019A>AT        | rs757446051  | ALS1_497               | BCKDHB  | 0.001404 | ./././Uncertain_significance/./././10.98                                              | Maple_syrup_urine_disease                                                              |
| 6:80350779A>C         | rs146824244  | ALS5_5608              | BCKDHB  | 0.007176 | ././benign/././././10.16                                                              | .                                                                                      |
| 6:87343950T>G         | rs1239137380 | ALS1_497               | SMIM8   | 1.31E-05 | ././benign/././././10.91                                                              | .                                                                                      |
| 6:87513967G>T         | rs139134669  | ALS4_539;A<br>LS7_5610 | RARS2   | 0.005988 | ././benign/././././10.23                                                              | .                                                                                      |
| 6:89623997T>A         | .            | ALS7_5610              | LYRM2   | 0.004519 | ././benign/./0.973/0.942/0.999/2.215/T/13.56                                          | .                                                                                      |
| 6:96886859T>G         | rs182505265  | ALS5_5608              | NDUF4F4 | 0.001715 | ././benign/././././13.26                                                              | .                                                                                      |
| 6:98917495A>G         | rs143154211  | ALS6_5609              | FBXL4   | 0.000723 | tolerated/benign/pathogenic/Uncertain_significance/0.0<br>04/0.073/0.989/0.69/T/16.79 | Mitochondrial_DNA_depletion_s<br>yndrome_13_(encephalomyopathi<br>c_type) not_provided |
| 6:99378948CT>C        | rs144759090  | ALS1_497               | COQ3    | 0.001824 | ././././././10.82                                                                     | .                                                                                      |
| 6:99378948CTT>C       | rs144759090  | ALS3_536               | COQ3    | 0.025838 | ././././././10.82                                                                     | .                                                                                      |
| 6:106575931T>A        | rs557628780  | ALS2_503               | RTN4IP1 | 0.00027  | ././benign/././././10.61                                                              | .                                                                                      |
| 6:107177862G>A        | rs1426407103 | ALS5_5608              | PDSS2   | 0        | ././benign/././././16.25                                                              | .                                                                                      |
| 6:107201390CA>C       | rs747612959  | ALS4_539               | PDSS2   | 0.018184 | ././././././12.52                                                                     | .                                                                                      |
| 6:107239395AATT><br>A | rs557244043  | ALS1_497               | PDSS2   | 0.002286 | ././././././15.07                                                                     | .                                                                                      |
| 6:107365710T>C        | rs574613432  | ALS7_5610              | PDSS2   | 0.000756 | ././benign/././././12.37                                                              | .                                                                                      |
| 6:107416562G>C        | .            | ALS4_539               | PDSS2   | 0        | ././benign/././././10.77                                                              | .                                                                                      |
| 6:107427560A>G        | rs187176999  | ALS6_5609              | PDSS2   | 0.005833 | ././benign/././././14.43                                                              | .                                                                                      |
| 6:108326540A>G        | rs770968102  | ALS4_539               | AFG1L   | 0.000591 | ././benign/././././14.07                                                              | .                                                                                      |
| 6:108340896T>A        | rs546059523  | ALS6_5609              | AFG1L   | 0.001439 | ././benign/././././10.72                                                              | .                                                                                      |
| 6:108363868A>G        | rs551257933  | ALS5_5608              | AFG1L   | 0.000637 | ././pathogenic/././././22.0                                                           | .                                                                                      |
| 6:108377818CT>C       | rs199511475  | ALS1_497               | AFG1L   | 0.011786 | ././././././11.96                                                                     | .                                                                                      |
| 6:108495721A>G        | rs767102878  | ALS4_539               | AFG1L   | 0.000578 | ././benign/././././17.81                                                              | .                                                                                      |
| 6:108507884C>T        | rs533731425  | ALS1_497               | AFG1L   | 0.000125 | ././benign/././././11.67                                                              | .                                                                                      |
| 6:127284727T>G        | rs184496482  | ALS3_536               | ECHDC1  | 0.000572 | ././benign/././././11.55                                                              | .                                                                                      |
| 6:127337490C>G        | rs776241829  | ALS8_5611              | ECHDC1  | 7.23E-05 | ././benign/././././10.82                                                              | .                                                                                      |
| 6:150994945A>G        | rs1207556353 | ALS3_536               | MTHFD1L | 1.31E-05 | ././benign/././././12.98                                                              | .                                                                                      |
| 6:151042587G>T        | rs575020062  | ALS2_503;<br>ALS8_5611 | MTHFD1L | 0.000421 | ././benign/././././16.66                                                              | .                                                                                      |
| 6:151452445G>C        | rs756319585  | ALS8_5611              | RMND1   | 1.97E-05 | ././benign/././././10.06                                                              | .                                                                                      |
| 6:161642098A>G        | rs546252361  | ALS6_5609              | PRKN    | 0.00025  | ././benign/././././12.25                                                              | .                                                                                      |
| 6:162648998A>G        | rs529518802  | ALS7_5610              | PRKN    | 0.001459 | ././benign/././././12.95                                                              | .                                                                                      |



|                    |              |           |          |          |                                                                                                 |                                                                           |
|--------------------|--------------|-----------|----------|----------|-------------------------------------------------------------------------------------------------|---------------------------------------------------------------------------|
| 7:23299353A>G      | rs200950879  | ALS4_539  | MALSU1   | 0.000493 | deleterious/benign/benign/.0.231/0.051/0.999/.T/18.80                                           | .                                                                         |
| 7:27517685A>AT     | rs200032035  | ALS3_536  | HIBADH   | 0.042601 | ./././././././10.11                                                                             | .                                                                         |
| 7:27541591T>C      | rs572713424  | ALS7_5610 | HIBADH   | 0.001163 | ././benign/.././././12.34                                                                       | .                                                                         |
| 7:27556307T>G      | rs551345110  | ALS8_5611 | HIBADH   | 0.000191 | ././benign/.././././12.86                                                                       | .                                                                         |
| 7:27662588A>T      | rs966917581  | ALS2_503  | HIBADH   | 4.6E-05  | ././benign/.././././11.57                                                                       | .                                                                         |
| 7:40300374A>G      | rs186425207  | ALS3_536  | SUGCT    | 0.000283 | ././benign/.././././10.63                                                                       | .                                                                         |
| 7:40348277C>G      | rs772809878  | ALS3_536  | SUGCT    | 8.54E-05 | ././benign/.././././13.46                                                                       | .                                                                         |
| 7:40379144A>G      | rs767110809  | ALS5_5608 | SUGCT    | 0.000736 | ././benign/.././././12.34                                                                       | .                                                                         |
| 7:40530559C>A      | rs191253702  | ALS7_5610 | SUGCT    | 0.003142 | ././benign/.././././15.34                                                                       | .                                                                         |
| 7:40721879A>G      | rs139915353  | ALS1_497  | SUGCT    | 0.002707 | ././benign/.././././13.29                                                                       | .                                                                         |
| 7:40762228T>C      | rs540139546  | ALS6_5609 | SUGCT    | 0.000374 | ././benign/.././././15.89                                                                       | .                                                                         |
| 7:40813970G>A      | rs573239511  | ALS5_5608 | SUGCT    | 0.000598 | ././benign/.././././14.50                                                                       | .                                                                         |
| 7:42935589A>G      | .            | ALS8_5611 | MRPL32   | 0        | ././benign/.././././12.83                                                                       | .                                                                         |
| 7:43859793C>G      | rs187912470  | ALS8_5611 | MRPS24   | 3.29E-05 | ././benign/.././././13.15                                                                       | .                                                                         |
| 7:75021908G>A      | rs942662977  | ALS6_5609 | CASTOR2  | 0.002352 | deleterious/probably_damaging/benign/.1/1/0.996/.T/26.4                                         | .                                                                         |
| 7:95588230T>C      | .            | ALS6_5609 | PDK4     | 0        | ././benign/.././././16.87                                                                       | .                                                                         |
| 7:96118628GA>G     | rs78530901   | ALS4_539  | SLC25A13 | 0.00318  | ./././././././10.03                                                                             | .                                                                         |
| 7:96174671C>T      | rs189529761  | ALS7_5610 | SLC25A13 | 0.001511 | ././benign/.././././14.27                                                                       | .                                                                         |
| 7:99407238T>G      | rs185197449  | ALS5_5608 | PDAP1    | 0.005722 | ././benign/.././././15.03                                                                       | .                                                                         |
| 7:102799451A>G     | rs765437889  | ALS1_497  | FAM185A  | 5.91E-05 | ././pathogenic/.././././10.88                                                                   | .                                                                         |
| 7:103067392T>C     | rs112939502  | ALS8_5611 | FBXL13   | 0.005091 | ././benign/.././././12.52                                                                       | .                                                                         |
| 7:103099796CT>C    | rs546919510  | ALS4_539  | ARMC10   | 0.001358 | ./././././././10.36                                                                             | .                                                                         |
| 7:107899984T>A     | rs1330646280 | ALS2_503  | DLD      | 0.000539 | ././benign/.././././13.58                                                                       | .                                                                         |
| 7:108514933G>A     | rs139626312  | ALS5_5608 | PNPLA8   | 0.002971 | deleterious/benign/benign/Conflicting_interpretations_of_pathogenicity/0.9/0.316/1/0.345/D/22.6 | Mitochondrial_myopathy-lactic_acidosis-deafness_syndrome not_provide<br>d |
| 7:108526309A>G     | rs571574461  | ALS2_503  | PNPLA8   | 0.001375 | ././benign/.././././11.62                                                                       | .                                                                         |
| 7:110724979G>A     | rs112072300  | ALS8_5611 | IMMP2L   | 0.004619 | ././pathogenic/.././././21.2                                                                    | .                                                                         |
| 7:110781410CTTTT>C | rs549941484  | ALS2_503  | IMMP2L   | 0.005663 | ./././././././10.55                                                                             | .                                                                         |
| 7:110786678C>T     | rs189599734  | ALS1_497  | IMMP2L   | 0.001659 | ././benign/.././././10.55                                                                       | .                                                                         |
| 7:110888464A>G     | rs536032055  | ALS3_536  | IMMP2L   | 0.002168 | ././benign/.././././11.04                                                                       | .                                                                         |
| 7:110963539ATCT>A  | rs780790549  | ALS3_536  | IMMP2L   | 1.32E-05 | ./././././././20.8                                                                              | .                                                                         |
| 7:111171362T>C     | rs571823194  | ALS2_503  | IMMP2L   | 0.002894 | ././benign/.././././10.95                                                                       | .                                                                         |
| 7:111304069C>T     | rs557153940  | ALS8_5611 | IMMP2L   | 0.002368 | ././benign/.././././13.92                                                                       | .                                                                         |
| 7:111349229T>G     | rs193092417  | ALS1_497  | IMMP2L   | 0.002005 | ././benign/.././././12.52                                                                       | .                                                                         |

|                                                                   |              |                       |        |          |                                        |              |
|-------------------------------------------------------------------|--------------|-----------------------|--------|----------|----------------------------------------|--------------|
| 7:111413698A>ATG<br>ATATGGCTGTTTC<br>C                            | rs1180257335 | ALS6_5609             | IMMP2L | 0.00193  | ./././././././12.05                    | .            |
| 7:111413700G>GAG<br>ACTATAGTGGAT<br>GGTCATAGTTCTT<br>TATTGGGACTTC | rs1274795952 | ALS6_5609             | IMMP2L | 0.000807 | ./././././././10.45                    | .            |
| 7:111424999TAGTC<br>ATTACATGA>T                                   | rs537695206  | ALS5_5608             | IMMP2L | 0.000184 | ./././././././12.04                    | .            |
| 7:122089949G>A                                                    | rs1041107168 | ALS8_5611             | AASS   | 5.26E-05 | ././benign/././././12.48               | .            |
| 7:127591374C>T                                                    | rs192153447  | ALS6_5609             | ARF5   | 0.000315 | ././pathogenic/././././15.78           | .            |
| 7:127595331G>A                                                    | rs150511464  | ALS5_5608             | ARF5   | 0.000841 | ././benign/./0.998/0.947/1/2.28/T/23.3 | .            |
| 7:127816222T>C                                                    | rs112156758  | ALS3_536              | SND1   | 0.000552 | ././benign/././././11.66               | .            |
| 7:127845068T>A                                                    | .            | ALS5_5608             | SND1   | 0        | ././benign/././././10.61               | .            |
| 7:127860092G>T                                                    | rs188923418  | ALS6_5609             | SND1   | 0.000644 | ././benign/././././20.5                | .            |
| 7:127882871A>G                                                    | rs555946924  | ALS5_5608             | SND1   | 0.00092  | ././benign/././././16.54               | .            |
| 7:127940507C>T                                                    | rs187512631  | ALS2_503              | SND1   | 0.005001 | ././benign/././././15.12               | .            |
| 7:128007844A>G                                                    | rs577667784  | ALS1_497              | SND1   | 9.85E-05 | ././benign/././././18.36               | .            |
| 7:128027686C>T                                                    | rs147853002  | ALS7_5610             | SND1   | 0.004593 | ././benign/././././16.89               | .            |
| 7:128028381A>G                                                    | rs555511715  | ALS6_5609             | SND1   | 0.000158 | ././pathogenic/././././16.75           | .            |
| 7:128032205CGCCG<br>GCGCCTTCCAGC<br>GCCGCGCCG>C                   | rs1472981829 | ALS6_5609             | SND1   | 0.000686 | ./././././././18.41                    | .            |
| 7:128042174G>A                                                    | .            | ALS6_5609             | SND1   | 0        | ././pathogenic/././././20.7            | .            |
| 7:128075844C>A                                                    | rs1044295059 | ALS4_539              | SND1   | 2.63E-05 | ././benign/././././10.92               | .            |
| 7:132798021T>C                                                    | rs1160432075 | ALS3_536              | CHCHD3 | 6.57E-06 | ././benign/././././14.44               | .            |
| 7:132798288A>T                                                    | rs139333910  | ALS3_536              | CHCHD3 | 0.002332 | ././pathogenic/././././18.76           | .            |
| 7:132798304A>G                                                    | .            | ALS6_5609             | CHCHD3 | 0        | ././benign/././././13.79               | .            |
| 7:132876156A>G                                                    | rs138496938  | ALS7_5610             | CHCHD3 | 0.003318 | ././benign/././././18.12               | .            |
| 7:132923864G>C                                                    | rs1341558471 | ALS3_536              | CHCHD3 | 6.57E-06 | ././benign/././././12.50               | .            |
| 7:132971786C>T                                                    | rs150816250  | ALS5_5608             | CHCHD3 | 0.005981 | ././benign/././././10.55               | .            |
| 7:133007747T>C                                                    | rs143878940  | ALS7_5610             | CHCHD3 | 0.003331 | ././benign/././././17.72               | .            |
| 7:133008425GA>G                                                   | rs988855864  | ALS1_497;<br>ALS2_503 | CHCHD3 | 0.001919 | ./././././././10.02                    | .            |
| 7:133035857C>T                                                    | rs571009566  | ALS2_503              | CHCHD3 | 0.000716 | ././pathogenic/././././12.16           | .            |
| 7:141636963C>A                                                    | rs771945804  | ALS2_503              | AGK    | 0        | ././benign/Pathogenic/./1/././37       | not_provided |
| 7:141748982A>G                                                    | rs1299536412 | ALS2_503              | SSBP1  | 0        | ././benign/././././10.31               | .            |
| 7:151068211C>T                                                    | rs567715989  | ALS6_5609             | SLC4A2 | 0.000585 | ././benign/././././12.12               | .            |
| 8:10095244G>A                                                     | rs182405042  | ALS4_539              | MSRA   | 0.003228 | ././benign/././././16.90               | .            |
| 8:10125004T>G                                                     | rs936657190  | ALS8_5611             | MSRA   | 3.94E-05 | ././benign/././././11.58               | .            |
| 8:10142677C>T                                                     | rs568303957  | ALS3_536              | MSRA   | 0.000191 | ././benign/././././10.10               | .            |

|                                          |              |                        |                 |          |                                                                      |              |
|------------------------------------------|--------------|------------------------|-----------------|----------|----------------------------------------------------------------------|--------------|
| 8:10167169C>G                            | rs75317853   | ALS2_503;<br>ALS4_539; | MSRA            | 0.003785 | ././benign/././././16.14                                             | .            |
| 8:10185181C>A                            | rs139050473  | ALS6_5609              | MSRA            | 0.002592 | ././pathogenic/././././13.25                                         | .            |
| 8:10246985A>T                            | rs191223351  | ALS2_503;<br>ALS4_539; | MSRA            | 0.003857 | ././benign/././././14.67                                             | .            |
| 8:10275062A>G                            | rs144600842  | ALS2_503;<br>ALS4_539; | MSRA            | 0.005009 | ././benign/././././11.69                                             | .            |
| 8:10281800C>A                            | rs116860713  | ALS2_503;<br>ALS4_539; | MSRA            | 0.007734 | ././benign/././././13.27                                             | .            |
| 8:10291612A>G                            | rs773931706  | ALS4_539               | MSRA            | 1.31E-05 | ././benign/././././17.60                                             | .            |
| 8:10299511A>G                            | rs117445903  | ALS2_503;<br>ALS4_539; | MSRA            | 0.005226 | ././benign/././././13.71                                             | .            |
| 8:10302187A>G                            | rs114677739  | ALS2_503;<br>ALS4_539; | MSRA            | 0.006746 | ././benign/././././15.64                                             | .            |
| 8:10310102T>A                            | rs142936623  | ALS2_503;<br>ALS4_539; | MSRA            | 0.005774 | ././pathogenic/././././16.27                                         | .            |
| 8:10361043T>C                            | rs368404603  | ALS1_497               | MSRA            | 0.001241 | ././benign/././././14.02                                             | .            |
| 8:17027610C>T                            | rs200500624  | ALS3_536               | MICU3           | 0.00539  | tolerated/benign/benign/./0.093/0.029/1/0.55/T/12.01                 | .            |
| 8:17068197A>G                            | rs562110617  | ALS8_5611              | MICU3           | 0.000237 | ././benign/././././11.59                                             | .            |
| 8:23572231AAAAA<br>AAAAAAAAAAAA<br>AAT>A | rs1219172223 | ALS3_536               | SLC25A37        | 0.000842 | ./././././././10.46                                                  | .            |
| 8:26383076G>T                            | rs572496113  | ALS8_5611              | BNIP3L          | 7.89E-05 | ././benign/././././20.6                                              | .            |
| 8:26386009G>A                            | rs562664239  | ALS2_503               | BNIP3L          | 9.2E-05  | ././benign/././././19.74                                             | .            |
| 8:27491109G>C                            | rs72473929   | ALS5_5608              | EPHX2           | 0.001005 | ././benign/././././12.66                                             | .            |
| 8:30677094A>C                            | rs932806479  | ALS2_503               | GSR             | 1.97E-05 | ././benign/././././15.14                                             | .            |
| 8:37763474G>T                            | rs182737918  | ALS1_497               | PLPBP           | 0.005171 | ././benign/././././12.68                                             | .            |
| 8:54142706T>C                            | rs146739374  | ALS2_503               | MRPL15          | 0.000709 | tolerated/benign/pathogenic/./0.002/0.016/0.96/-<br>0.295/T/22.4     | .            |
| 8:54157269A>G                            | rs144453766  | ALS2_503               | RNU6ATA<br>C32P | 0.005047 | ././benign/././././11.19                                             | .            |
| 8:65718158C>G                            | rs118128137  | ALS8_5611              | MTFR1           | 0.004829 | ././pathogenic/././././16.82                                         | .            |
| 8:66430093G>A                            | rs34974332   | ALS6_5609              | ADHFE1          | 0.000933 | ././benign/./0.004/0.006/1/1.83/D/21.0                               | .            |
| 8:70642042C>T                            | rs552289232  | ALS8_5611              | LACTB2          | 0.000999 | ././benign/././././11.12                                             | .            |
| 8:70644217TCAGTG<br>TGGC>T               | rs561918644  | ALS8_5611              | LACTB2          | 0.003523 | ./././././././21.8                                                   | .            |
| 8:73971874C>A                            | rs186794408  | ALS5_5608              | TMEM70          | 0.002945 | ././benign/././././12.04                                             | .            |
| 8:79931048A>T                            | rs948304431  | ALS3_536               | MRPS28          | 3.94E-05 | ././benign/././././10.04                                             | .            |
| 8:79950699T>C                            | rs116995073  | ALS5_5608              | MRPS28          | 0.005241 | ././benign/././././11.21                                             | .            |
| 8:86496044A>G                            | rs562605558  | ALS1_497               | RMDN1           | 0.000368 | ././benign/././././11.12                                             | .            |
| 8:93917735A>C                            | rs1377008043 | ALS4_539               | PDP1            | 0.000874 | ././benign/././././16.06                                             | .            |
| 8:95025091G>C                            | rs201223057  | ALS3_536               | NDUFAF6         | 0.002089 | tolerated/benign/benign/Likely_benign/0.088/0.034/1/0.<br>69/T/10.52 | not_provided |

|                                                           |              |                       |               |          |                                                                       |   |
|-----------------------------------------------------------|--------------|-----------------------|---------------|----------|-----------------------------------------------------------------------|---|
| 8:96234823G>A                                             | rs1473636960 | ALS2_503              | UQCRB         | 0        | ././benign/././././17.19                                              | . |
| 8:96250935G>C                                             | .            | ALS4_539              | MTERF3        | 0        | tolerated/benign/benign/./0.006/0.005/0.966/0.41/T/13.93              | . |
| 8:106332021T>C                                            | rs534692339  | ALS2_503              | OXR1          | 0.001003 | ././benign/././././14.67                                              | . |
| 8:106337072A>G                                            | rs187360751  | ALS7_5610             | OXR1          | 0.004762 | ././benign/././././15.47                                              | . |
| 8:106358275A>G                                            | rs562953453  | ALS6_5609             | OXR1          | 0.001039 | ././benign/././././11.46                                              | . |
| 8:106414890T>C                                            | rs1009583516 | ALS2_503              | OXR1          | 1.97E-05 | ././benign/././././20.4                                               | . |
| 8:106455579A>G                                            | rs536247877  | ALS5_5608             | OXR1          | 0.000552 | ././benign/././././13.69                                              | . |
| 8:106679718A>G                                            | rs181430419  | ALS4_539              | OXR1          | 0.002648 | ././benign/././././12.19                                              | . |
| 8:106739321T>C                                            | rs3739323    | ALS8_5611             | OXR1          | 0.016118 | ././benign/././././11.03                                              | . |
| 8:120389801C>A                                            | rs144906584  | ALS2_503              | MRPL13        | 0.003401 | ././benign/././././13.93                                              | . |
| 8:120450065T>A                                            | rs62528319   | ALS5_5608             | MRPL13        | 0.002394 | ././benign/././././11.43                                              | . |
| 8:124350070A>C                                            | rs115607174  | ALS3_536              | TMEM65        | 0.028676 | ././benign/././././10.35                                              | . |
| 8:143299423C>T                                            | rs531354684  | ALS3_536              | TOP1MT        | 0.000664 | ././benign/././././14.58                                              | . |
| 8:144385963CA>C                                           | rs879964077  | ALS2_503              | ADCK5         | 0.002394 | ././././././11.45                                                     | . |
| 8:144385963C>CA                                           | rs879964077  | ALS3_536              | ADCK5         | 0.001423 | ././././././10.81                                                     | . |
| 8:144395469G>A                                            | rs782156961  | ALS7_5610             | ADCK5         | 1.97E-05 | ././pathogenic/./0.981/0.768/1/2.94/D/24.4                            | . |
| 8:144399650G>A                                            | .            | ALS7_5610             | CPSF1         | 0        | deleterious/probably_damaging/pathogenic/./0.997/0.967/1/1.655/T/26.2 | . |
| 8:144502615G>C                                            | rs1053742811 | ALS2_503              | PPP1R16A      | 1.32E-05 | ././benign/././././13.16                                              | . |
| 8:144529620G>A                                            | rs371288035  | ALS8_5611             | C8orf82       | 0.001321 | ././benign/././././16.29                                              | . |
| 8:144529788T>A                                            | .            | ALS8_5611             | C8orf82       | 0.002328 | ././benign/././././14.10                                              | . |
| 9:6553028T>C                                              | rs777466122  | ALS8_5611             | GLDC          | 9.21E-05 | ././benign/././././12.02                                              | . |
| 9:6611238G>C                                              | rs193049097  | ALS8_5611             | GLDC          | 0.000815 | ././benign/././././11.64                                              | . |
| 9:6625683T>A                                              | .            | ALS4_539              | GLDC          | 0        | ././benign/././././11.33                                              | . |
| 9:69064224C>G                                             | rs761070483  | ALS8_5611             | FXN           | 4.6E-05  | ././benign/././././13.85                                              | . |
| 9:76394542A>AGCC<br>CCGCCCCATCAT<br>GGCCCCGCCCCA<br>TCATG | rs538738583  | ALS8_5611             | RFK           | 0.001947 | ././././././18.43                                                     | . |
| 9:99906588CGGGG<br>CGGGGGCG>C                             | rs746882663  | ALS2_503              | STX17         | 0.004865 | ././././././10.50                                                     | . |
| 9:99917473G>A                                             | rs182341907  | ALS5_5608             | STX17         | 0.002248 | ././benign/././././17.05                                              | . |
| 9:99967591T>A                                             | rs117850621  | ALS6_5609             | STX17         | 0.005697 | ././pathogenic/././././18.15                                          | . |
| 9:104739806T>C                                            | rs763561001  | ALS1_497              | NIPSNAP3<br>A | 5.26E-05 | ././benign/././././13.61                                              | . |
| 9:121336783C>T                                            | rs182519055  | ALS5_5608             | STOM          | 0.006547 | ././benign/././././10.15                                              | . |
| 9:122271603C>A                                            | rs12376093   | ALS1_497;<br>ALS3_536 | MRRF          | 0.003397 | ././benign/././././16.34                                              | . |
| 9:122281288T>G                                            | rs139673690  | ALS7_5610             | MRRF          | 0.004441 | ././pathogenic/././././16.85                                          | . |
| 9:122281988G>C                                            | rs965893026  | ALS2_503              | MRRF          | 3.29E-05 | ././benign/././././15.28                                              | . |
| 9:122291452G>T                                            | rs140077839  | ALS6_5609             | MRRF          | 0.000191 | ././pathogenic/././././20.3                                           | . |

|                  |              |                       |          |          |                                                                                 |                         |
|------------------|--------------|-----------------------|----------|----------|---------------------------------------------------------------------------------|-------------------------|
| 9:127798462T>C   | .            | ALS3_536              | FPGS     | 0        | ././benign/././././12.30                                                        | .                       |
| 9:128101311C>T   | rs35473740   | ALS1_497              | SLC25A25 | 0.000151 | tolerated/benign/benign/./0.022/0.022/1/1.615/T/22.0                            | .                       |
| 9:129104214G>C   | rs148243375  | ALS6_5609             | CRAT     | 0.001045 | tolerated/benign/pathogenic/Benign/0/0.001/0.621/0.945/T/17.04                  | not_provided            |
| 9:133350074G>A   | rs41313873   | ALS6_5609             | SURF1    | 0.007044 | ././benign/././././10.02                                                        | .                       |
| 9:133360052G>A   | rs62637581   | ALS2_503              | SURF2    | 0.000269 | tolerated/benign/benign/./0.795/0.113/1/2.08/T/11.13                            | .                       |
| 9:133362377G>A   | rs139684139  | ALS2_503              | SURF4    | 0.003726 | ././benign/././././12.42                                                        | .                       |
| 9:133729791C>T   | rs137999690  | ALS2_503              | SARDH    | 0.00094  | tolerated/possibly_damaging/pathogenic/./0.948/0.591/1/1.78/D/21.6              | .                       |
| 9:137552502G>C   | rs4551       | ALS5_5608             | MRPL41   | 0.003475 | ././benign/././././10.91                                                        | .                       |
| 10:12129703G>A   | rs531245228  | ALS7_5610             | SEC61A2  | 0.002183 | ././benign/././././12.40                                                        | .                       |
| 10:26697752G>T   | rs1337919886 | ALS1_497              | PDSS1    | 6.58E-06 | deleterious/benign/benign/./0.002/0.003/0.607/1.845/T/23.9                      | .                       |
| 10:26710156A>T   | rs1370374849 | ALS1_497              | PDSS1    | 0.000206 | ././benign/././././10.11                                                        | .                       |
| 10:26746373A>G   | rs770190130  | ALS6_5609             | PDSS1    | 1.31E-05 | deleterious/probably_damaging/pathogenic/./1/0.996/1/2.645/D/32                 | .                       |
| 10:26755327T>TA  | rs1338584730 | ALS4_539              | ABI1     | 2.63E-05 | ././././././13.17                                                               | .                       |
| 10:46006369A>G   | rs113983044  | ALS6_5609             | TIMM23   | 0.007699 | ././benign/././././15.51                                                        | .                       |
| 10:46010581T>C   | rs61754798   | ALS8_5611             | NCOA4    | 0.003541 | tolerated/benign/benign/not_provided/./././19.78                                | not_provided            |
| 10:49739779A>G   | rs143105288  | ALS7_5610             | OGDHL    | 0.006263 | deleterious/probably_damaging/pathogenic/Likely_benign/0.996/0.954/1/4.385/D/31 | Inborn_genetic_diseases |
| 10:58272225TA>T  | rs11435069   | ALS2_503              | CISD1    | 0.001373 | ././././././10.51                                                               | .                       |
| 10:58394263G>A   | rs191159394  | ALS8_5611             | TFAM     | 4.6E-05  | ././benign/././././11.68                                                        | .                       |
| 10:68454356CA>C  | rs562333641  | ALS3_536              | DNA2     | 0.062868 | ././././././11.82                                                               | .                       |
| 10:68491046T>A   | rs139555638  | ALS6_5609             | SLC25A16 | 0.001862 | ././benign/././././10.18                                                        | .                       |
| 10:70124080C>A   | rs41277978   | ALS3_536              | AIFM2    | 0.004099 | deleterious/probably_damaging/pathogenic/./1/0.999/1/1.995/T/23.6               | .                       |
| 10:72721357A>T   | rs761605865  | ALS8_5611             | MCU      | 0.000151 | ././benign/././././12.46                                                        | .                       |
| 10:72812965T>C   | .            | ALS5_5608             | MCU      | 0        | ././benign/././././17.08                                                        | .                       |
| 10:72853203T>C   | rs147565386  | ALS6_5609             | MCU      | 0.000842 | ././benign/././././11.39                                                        | .                       |
| 10:73122286T>G   | rs149066778  | ALS6_5609             | NUDT13   | 0.002115 | deleterious/possibly_damaging/benign/./0.985/0.706/0.88/2.52/T/25.3             | .                       |
| 10:73785808C>T   | rs536569732  | ALS4_539              | CHCHD1   | 0.00094  | ././benign/././././19.95                                                        | .                       |
| 10:80414331C>T   | rs765873836  | ALS5_5608             | PRXL2A   | 9.2E-05  | ././benign/././././12.92                                                        | .                       |
| 10:84140097C>T   | rs1469461250 | ALS4_539              | GHITM    | 6.57E-06 | ././benign/././././12.46                                                        | .                       |
| 10:87801289T>C   | rs186947620  | ALS4_539              | ATAD1    | 0.006373 | ././benign/././././14.73                                                        | .                       |
| 10:87818279A>G   | rs41299161   | ALS4_539              | ATAD1    | 0.006144 | ././benign/././././15.71                                                        | .                       |
| 10:92472642CTT>C | rs35959170   | ALS2_503;<br>ALS4_539 | IDE      | 0.000763 | ././././././14.75                                                               | .                       |
| 10:92472642C>CT  | rs35959170   | ALS5_5608             | IDE      | 0.006283 | ././././././15.57                                                               | .                       |

|                         |              |                       |             |          |                                                                                     |                |
|-------------------------|--------------|-----------------------|-------------|----------|-------------------------------------------------------------------------------------|----------------|
| 10:92521398TA>T         | rs879425676  | ALS1_497;<br>ALS4_539 | IDE         | 0.001898 | ././././././././10.14                                                               | .              |
| 10:97578505C>T          | rs36020819   | ALS6_5609             | ANKRD2      | 0.004587 | deleterious/benign/pathogenic/Benign/0.96/0.711/1/1.04<br>/T/24.1                   | not_provided   |
| 10:99614939A>G          | rs117154413  | ALS6_5609             | SLC25A28    | 0.00701  | ././benign/./././././14.54                                                          | .              |
| 10:99706982T>C          | rs774468091  | ALS3_536              | COX15       | 0.000282 | ././benign/./././././14.59                                                          | .              |
| 10:99729694C>T          | rs141506146  | ALS6_5609             | COX15       | 0.000112 | deleterious/benign/benign/Uncertain_significance/0.001<br>/0.003/0.567/0.895/T/23.4 | Leigh_syndrome |
| 10:100514556T>TA        | rs1193831818 | ALS2_503              | SEC31B      | 0.010723 | ././././././././11.62                                                               | .              |
| 10:101032325C>T         | rs185856010  | ALS4_539              | SFXN3       | 0.000815 | ././benign/./././././15.25                                                          | .              |
| 10:103396597G>A         | rs762283604  | ALS3_536              | ATP5MD      | 0.000177 | ././benign/./././././10.22                                                          | .              |
| 10:103398247A>G         | rs76145370   | ALS3_536              | ATP5MD      | 0.004105 | ././benign/./././././10.10                                                          | .              |
| 10:112151477T>C         | rs144051314  | ALS7_5610             | GPAM        | 0.006332 | ././pathogenic/./././././15.80                                                      | .              |
| 10:112152824G>A         | rs144174877  | ALS3_536              | GPAM        | 0.003699 | ././benign/./././././12.13                                                          | .              |
| 10:123000628T>C         | rs940170030  | ALS6_5609             | IKZF5       | 0.000486 | ././benign/./././././10.65                                                          | .              |
| 10:123051188TA>T        | rs10571424   | ALS1_497              | ACADSB      | 0.032543 | ././././././././10.14                                                               | .              |
| 10:124420383C>T         | .            | ALS5_5608             | OAT         | 0        | ././benign/./././././10.43                                                          | .              |
| 10:133388960G>GG<br>TCA | rs1459322189 | ALS7_5610             | PAOX        | 2.63E-05 | ././././././././23.6                                                                | .              |
| 10:133407970G>A         | rs150538191  | ALS2_503              | MTG1        | 0.007253 | ././benign/./././././11.61                                                          | .              |
| 10:133423524G>A         | rs1351288595 | ALS2_503              | MTG1        | 1.34E-05 | ././benign/./0.354/0.041/0.764/2.39/T/22.9                                          | .              |
| 11:6474177C>G           | rs925982476  | ALS5_5608             | TRIM3       | 2.63E-05 | ././benign/./././././11.27                                                          | .              |
| 11:6488086T>C           | rs192750116  | ALS4_539              | TIMM10B     | 0.001774 | ././benign/./././././10.04                                                          | .              |
| 11:20366039A>C          | rs543506625  | ALS8_5611             | HTATIP2     | 0.000201 | ././benign/./././././10.77                                                          | .              |
| 11:28110143G>A          | rs35686304   | ALS7_5610             | METTL15     | 0.002036 | ././benign/./././././12.79                                                          | .              |
| 11:31449125A>T          | .            | ALS1_497              | IMMP1L      | 0        | ././benign/./././././15.63                                                          | .              |
| 11:34919550C>T          | rs1215715731 | ALS3_536              | PDHX        | 6.57E-06 | ././benign/./././././13.77                                                          | .              |
| 11:34926910T>G          | rs528331306  | ALS1_497              | PDHX        | 0.003616 | ././benign/./././././11.11                                                          | .              |
| 11:59810778C>T          | rs970272411  | ALS7_5610             | MRPL16      | 0        | ././benign/./././././11.31                                                          | .              |
| 11:64072034C>T          | rs9783361    | ALS3_536              | MACROD<br>1 | 0.011985 | ././benign/./././././13.83                                                          | .              |
| 11:64293146G>T          | rs150371580  | ALS8_5611             | KCNK4       | 0.000585 | tolerated/benign/benign/./0.021/0.024/0.986/1.15/T/21.1                             | .              |
| 11:65128334G>A          | .            | ALS1_497              | MRPL49      | 0        | ././benign/./././././13.94                                                          | .              |
| 11:65132603C>G          | rs763493149  | ALS1_497              | SYVN1       | 1.31E-05 | ././benign/./././././14.68                                                          | .              |
| 11:65386664G>C          | .            | ALS8_5611             | SLC25A45    | 6.57E-06 | ././benign/./././././10.41                                                          | .              |
| 11:66426135G>A          | .            | ALS1_497              | NPAS4       | 0        | ././benign/./././././14.04                                                          | .              |
| 11:66858373C>T          | rs537084771  | ALS4_539              | PC          | 6.57E-05 | ././No/./1/1/1/2.695/T/23.6                                                         | .              |
| 11:66953162CAAG><br>C   | rs535692776  | ALS6_5609             | PC          | 0.003679 | ././././././././11.05                                                               | .              |
| 11:66961586A>T          | .            | ALS3_536              | PC          | 0        | ././benign/./././././16.73                                                          | .              |
| 11:68815058C>T          | rs560794902  | ALS5_5608             | CPT1A       | 0.001078 | ././benign/./././././11.39                                                          | .              |

|                  |              |                         |          |          |                                                                                                           |                                                                                                              |
|------------------|--------------|-------------------------|----------|----------|-----------------------------------------------------------------------------------------------------------|--------------------------------------------------------------------------------------------------------------|
| 11:68908213G>T   | .            | ALS8_5611               | MRPL21   | 0        | ././benign/./0.129/0.043/0.995/2.265/T/14.26                                                              | .                                                                                                            |
|                  |              |                         |          |          |                                                                                                           | 3-                                                                                                           |
| 11:72372993C>T   | rs143097446  | ALS8_5611               | CLPB     | 0.00445  | tolerated/benign/benign/Benign/Likely_benign/0.019/0.011/1/0.69/T/17.59                                   | methylglutaconic_aciduria_with_cataracts,_neurologic_involvement,_and_neutropenia not_specified not_provided |
| 11:72422923C>T   | rs184738178  | ALS5_5608               | CLPB     | 0.003824 | ././benign/./././././14.29                                                                                | .                                                                                                            |
| 11:72580315C>T   | rs143118302  | ALS2_503;<br>ALS6_5609  | PDE2A    | 0.004261 | ././benign/./././././10.66                                                                                | .                                                                                                            |
| 11:72584037G>A   | rs956157527  | ALS6_5609               | PDE2A    | 0.000151 | ././benign/./././././14.20                                                                                | .                                                                                                            |
| 11:72601407G>A   | rs1482066676 | ALS7_5610               | PDE2A    | 1.6E-05  | ././benign/./././././12.24                                                                                | .                                                                                                            |
| 11:73964917T>G   | rs139317756  | ALS6_5609               | DNAJB13  | 0.001685 | deleterious/benign/pathogenic/Likely_benign/0.03/0.055/1/3.4/T/24.5                                       | not_provided                                                                                                 |
| 11:73970199G>C   | rs188177227  | ALS7_5610               | UCP2     | 0.001366 | ././benign/./././././10.56                                                                                | .                                                                                                            |
| 11:78075459C>T   | rs117547352  | ALS6_5609               | NDUFC2   | 0.005197 | ././benign/./././././12.77                                                                                | .                                                                                                            |
| 11:78466153C>T   | rs765066308  | ALS4_539                | NARS2    | 6.57E-05 | ././benign/./././././14.90                                                                                | .                                                                                                            |
| 11:78526339G>A   | .            | ALS2_503                | NARS2    | 0        | ././benign/./././././17.32                                                                                | .                                                                                                            |
| 11:78562134T>C   | rs148993906  | ALS6_5609               | NARS2    | 0.002294 | ././benign/./././././13.75                                                                                | .                                                                                                            |
| 11:78571419T>C   | rs201751992  | ALS2_503                | NARS2    | 4.62E-05 | tolerated/probably_damaging/pathogenic/Conflicting_interpretations_of_pathogenicity/1/0.986/1/3.49/T/24.3 | Combined_oxidative_phosphorylation_deficiency_24 not_provided                                                |
| 11:83285711G>A   | rs536788844  | ALS7_5610               | CCDC90B  | 0.000112 | ././benign/./././././10.24                                                                                | .                                                                                                            |
| 11:83286535A>G   | rs75113853   | ALS7_5610               | CCDC90B  | 0.005298 | ././benign/./././././11.44                                                                                | .                                                                                                            |
| 11:85631991T>G   | rs528300437  | ALS3_536                | TMEM126B | 0.002765 | ././benign/./././././12.02                                                                                | .                                                                                                            |
| 11:86524653T>G   | rs139524923  | ALS8_5611               | ME3      | 0.005736 | ././benign/./././././15.34                                                                                | .                                                                                                            |
| 11:110456995A>G  | rs147778113  | ALS4_539                | FDX1     | 0.00065  | tolerated/benign/benign/./0.005/0.005/0.978/0.69/T/11.16                                                  | .                                                                                                            |
| 11:112014888C>CT | rs200874690  | ALS3_536                | DIXDC1   | 0.001275 | ./././././././13.70                                                                                       | .                                                                                                            |
| 11:112170498A>G  | rs113640749  | ALS5_5608               | BCO2     | 0.004047 | ././benign/./0.003/0.004/0.897/0.695/T/15.44                                                              | .                                                                                                            |
| 11:112224960A>C  | rs7945257    | ALS8_5611               | BCO2     | 0.072339 | ././benign/./././././12.63                                                                                | .                                                                                                            |
| 11:119188823C>T  | rs146107413  | ALS6_5609               | NLRX1    | 0.000434 | ././benign/./././1././38                                                                                  | .                                                                                                            |
| 11:126285162T>C  | rs150070873  | ALS3_536                | TIRAP    | 0.006439 | ././benign/./././././10.53                                                                                | .                                                                                                            |
| 12:6492453G>A    | rs141891222  | ALS5_5608               | MRPL51   | 0.006015 | deleterious/probably_damaging/pathogenic/./1/0.998/1/2.75/T/31                                            | .                                                                                                            |
| 12:6963603G>A    | rs745889249  | ALS7_5610               | PHB2     | 0.001725 | ././benign/./././././12.96                                                                                | .                                                                                                            |
| 12:6977972A>C    | rs782301379  | ALS7_5610               | EMG1     | 0.000782 | ././benign/./././././10.37                                                                                | .                                                                                                            |
| 12:32705995T>C   | rs553601095  | ALS2_503                | DNM1L    | 0.00021  | ././pathogenic/./././././17.57                                                                            | .                                                                                                            |
| 12:39629500G>T   | rs140979273  | ALS5_5608               | C12orf40 | 0.005733 | ././benign/./././././11.89                                                                                | .                                                                                                            |
| 12:50123671C>CT  | rs113279297  | ALS3_536                | COX14    | 0.029875 | ./././././././10.82                                                                                       | .                                                                                                            |
| 12:55715531G>C   | rs144234513  | ALS5_5608;<br>ALS6_5609 | BLOC1S1  | 0.004762 | ././benign/./././././16.23                                                                                | .                                                                                                            |

|                            |              |                         |          |          |                                                                         |                                                                     |
|----------------------------|--------------|-------------------------|----------|----------|-------------------------------------------------------------------------|---------------------------------------------------------------------|
| 12:56002556CCCT><br>C      | rs765291957  | ALS2_503                | SUOX     | 1.31E-05 | ./././././././12.97                                                     | .                                                                   |
| 12:56477848G>C             | rs12819483   | ALS6_5609               | SPRYD4   | 0.004061 | ././pathogenic/././././13.05                                            | .                                                                   |
| 12:57235379G>T             | rs1032051308 | ALS2_503                | SHMT2    | 6.59E-06 | ././benign/././././17.58                                                | .                                                                   |
| 12:57241598T>C             | rs541722468  | ALS5_5608;<br>ALS6_5609 | SHMT2    | 0.002352 | ././benign/././././19.01                                                | .                                                                   |
| 12:57241873GC>G            | rs961228457  | ALS8_5611               | SHMT2    | 0.000303 | ./././././././13.19                                                     | .                                                                   |
| 12:57755023CATCC<br>TTCA>C | rs1595113302 | ALS5_5608               | MARCH9   | 0.000838 | ./././././././15.21                                                     | .                                                                   |
| 12:57755034CGCT><br>C      | rs1394647227 | ALS5_5608               | MARCH9   | 0.000465 | ./././././././15.44                                                     | .                                                                   |
| 12:57801373G>T             | rs560739712  | ALS6_5609               | TSFM     | 0.001951 | ././benign/././././11.40                                                | .                                                                   |
| 12:57807722C>G             | rs150785031  | ALS2_503                | TSFM     | 0.001091 | ././pathogenic/./1/0.999/1/3.28/T/28.6                                  | .                                                                   |
| 12:65436663A>G             | rs146310140  | ALS6_5609               | MSRB3    | 0.001573 | ././benign/././././11.50                                                | .                                                                   |
| 12:65459278C>T             | rs764167816  | ALS8_5611               | MSRB3    | 0.001059 | ././benign/././././10.18                                                | .                                                                   |
| 12:101714235C>T            | .            | ALS8_5611               | CHPT1    | 0        | deleterious/possibly_damaging/pathogenic/./0.675/0.35<br>1/1/2.285/T/31 | .                                                                   |
| 12:101717303A>G            | rs757223358  | ALS8_5611               | CHPT1    | 0.000197 | ././benign/././././14.26                                                | .                                                                   |
| 12:104308878A>G            | rs117196303  | ALS3_536;<br>ALS6_5609  | TXNRD1   | 0.00589  | ././benign/././././14.02                                                | .                                                                   |
| 12:105045410A>C            | rs186839012  | ALS8_5611               | ALDH1L2  | 0.002269 | ././benign/././././10.69                                                | .                                                                   |
| 12:109548440A>C            | rs1485878921 | ALS6_5609               | NA       | 2.63E-05 | ././benign/././././14.22                                                | .                                                                   |
| 12:110535360CATT<br>CTT>C  | rs1487066813 | ALS1_497                | PPTC7    | 0.000131 | ./././././././12.82                                                     | .                                                                   |
| 12:110581650C>T            | rs139936355  | ALS5_5608               | PPTC7    | 0.00207  | ././benign/././././13.40                                                | .                                                                   |
| 12:120515156A>G            | rs921605157  | ALS7_5610               | COQ5     | 7.9E-05  | ././benign/././././11.60                                                | .                                                                   |
| 12:120530067CTG><br>C      | rs575206600  | ALS2_503                | COQ5     | 0.00376  | ./././././././15.12                                                     | .                                                                   |
| 12:122200274G>A            | rs201278911  | ALS4_539                | LRRC43   | 0.000762 | tolerated/benign/benign/./0.035/0.019/0.997/1.19/T/10.84                | .                                                                   |
| 12:122206937T>TA           | rs745507521  | ALS5_5608               | DIABLO   | 0.000237 | ./././././././24.8                                                      | .                                                                   |
| 12:123261282C>A            | rs41276694   | ALS7_5610               | C12orf65 | 0.001558 | ././pathogenic/././././14.19                                            | .                                                                   |
| 13:21518872A>C             | rs116841139  | ALS3_536                | MICU2    | 0.005271 | ././benign/././././10.20                                                | .                                                                   |
| 13:21564339G>A             | rs117665658  | ALS1_497                | MICU2    | 0.006193 | ././benign/././././10.28                                                | .                                                                   |
| 13:21576346A>G             | rs142228016  | ALS8_5611               | MICU2    | 0.00637  | ././benign/././././13.22                                                | .                                                                   |
| 13:23743263T>C             | rs184338018  | ALS2_503                | MIPEP    | 0.002787 | ././benign/././././15.32                                                | .                                                                   |
| 13:40809725G>T             | rs17090557   | ALS1_497                | SLC25A15 | 0.0057   | ././pathogenic/Likely_benign/././././16.73                              | Hyperornithinemia-<br>hyperammonemia-<br>homocitrullinuria_syndrome |
| 13:41600776G>C             | rs113422215  | ALS4_539                | VWA8     | 0.005573 | ././benign/././././10.83                                                | .                                                                   |
| 13:41615006C>T             | rs73464952   | ALS1_497                | VWA8     | 0.004568 | deleterious/possibly_damaging/benign/./0.996/0.781/1/2<br>.34/T/23.8    | .                                                                   |



|                 |              |                        |          |          |                                                                                  |                                                                                  |
|-----------------|--------------|------------------------|----------|----------|----------------------------------------------------------------------------------|----------------------------------------------------------------------------------|
| 13:41659961T>C  | rs36093708   | ALS3_536               | VWA8     | 0.006484 | ././benign/././././13.50                                                         | .                                                                                |
| 13:41704667C>T  | rs12872656   | ALS3_536               | VWA8     | 0.003001 | ././benign/././././10.30                                                         | .                                                                                |
| 13:43064930A>C  | rs112965900  | ALS4_539:<br>ALS5_5608 | DNAJC15  | 0.005568 | ././benign/././././11.76                                                         | .                                                                                |
| 13:47954201C>A  | rs1245036990 | ALS8_5611              | SUCLA2   | 0        | deleterious/probably_damaging/pathogenic/./1/1/4.88<br>5/D/26.2                  | .                                                                                |
| 13:48000448G>A  | rs540656578  | ALS4_539               | SUCLA2   | 0.000585 | ././benign/././././11.13                                                         | .                                                                                |
| 13:76957044A>G  | rs116855637  | ALS1_497               | ACOD1    | 0.006669 | deleterious/probably_damaging/pathogenic/././0.993/2<br>.355/T/25.3              | .                                                                                |
| 13:99608942T>G  | rs1306842617 | ALS4_539               | CLYBL    | 0.00279  | ././benign/././././11.99                                                         | .                                                                                |
| 13:99644510A>C  | rs572421145  | ALS8_5611              | CLYBL    | 0.002681 | ././benign/././././12.48                                                         | .                                                                                |
| 13:99687807A>G  | rs145405115  | ALS7_5610              | CLYBL    | 0.007766 | ././benign/././././15.51                                                         | .                                                                                |
| 13:99698937T>C  | rs571053083  | ALS2_503               | CLYBL    | 0.000296 | ././pathogenic/././././21.3                                                      | .                                                                                |
| 13:99734808A>C  | .            | ALS8_5611              | CLYBL    | 0        | ././benign/././././10.38                                                         | .                                                                                |
| 13:99764847A>AT | rs756835141  | ALS1_497               | CLYBL    | 0.03148  | ././././././10.83                                                                | .                                                                                |
| 13:99799525G>A  | rs772327955  | ALS1_497               | CLYBL    | 3.94E-05 | ././benign/././././13.98                                                         | .                                                                                |
| 13:99824682T>C  | rs117372177  | ALS1_497               | CLYBL    | 0.014365 | ././benign/././././14.31                                                         | .                                                                                |
| 13:99838100A>G  | rs11840555   | ALS1_497               | CLYBL    | 0.021581 | ././benign/././././14.78                                                         | .                                                                                |
| 13:99844622C>T  | rs1156647734 | ALS4_539               | CLYBL    | 2.63E-05 | ././benign/././././11.56                                                         | .                                                                                |
| 13:99857487A>C  | rs551189169  | ALS8_5611              | CLYBL    | 0.00021  | ././pathogenic/././././11.10                                                     | .                                                                                |
| 13:100119093A>G | rs184566622  | ALS3_536               | PCCA     | 0.001941 | ././benign/././././11.49                                                         | .                                                                                |
| 13:100221531G>C | rs554147983  | ALS8_5611              | PCCA     | 0.00094  | ././benign/././././10.09                                                         | .                                                                                |
| 13:100306635T>C | rs188919545  | ALS4_539               | PCCA     | 0.001562 | ././pathogenic/././././15.31                                                     | .                                                                                |
| 13:100409218C>A | rs189134186  | ALS2_503               | PCCA     | 0.001617 | ././benign/././././11.91                                                         | .                                                                                |
| 13:100522709G>A | rs557247098  | ALS2_503               | PCCA     | 0.002071 | ././pathogenic/././././20.5                                                      | .                                                                                |
| 13:100526466G>T | rs1004400979 | ALS4_539               | PCCA     | 0        | ././benign/././././10.45                                                         | .                                                                                |
| 13:110683132T>C | rs150286306  | ALS2_503               | CARS2    | 0.000769 | tolerated/benign/benign/Uncertain_significance/0.005/0.<br>02/0.849/-0.84/T/22.1 | Combined_oxidative_phosphoryl<br>ation_deficiency_27 Inborn_genet<br>ic_diseases |
| 14:23310153G>A  | rs543708304  | ALS5_5608              | BCL2L2   | 0.000947 | ././benign/././././11.51                                                         | .                                                                                |
| 14:24094544G>A  | rs561035624  | ALS5_5608              | PCK2     | 0.003417 | ././benign/././././17.16                                                         | .                                                                                |
| 14:24287248C>T  | rs74485895   | ALS5_5608              | DHRS1    | 0.001163 | ././benign/././././11.00                                                         | .                                                                                |
| 14:24303966G>T  | rs189010949  | ALS3_536               | DHRS1    | 0.000874 | ././benign/././././11.36                                                         | .                                                                                |
| 14:24305018C>T  | rs201242778  | ALS3_536               | NOP9     | 0.000375 | deleterious/possibly_damaging/benign/./0.998/0.819/1/0<br>.895/T/28.3            | .                                                                                |
| 14:31690126A>C  | rs185824116  | ALS5_5608              | NUBPL    | 0.001332 | ././benign/././././10.77                                                         | .                                                                                |
| 14:31801847A>G  | rs1397191929 | ALS1_497               | NUBPL    | 1.31E-05 | ././benign/././././10.55                                                         | .                                                                                |
| 14:31848903C>CT | .            | ALS4_539               | NUBPL    | 2.63E-05 | ././././././14.24                                                                | .                                                                                |
| 14:31848904A>AG | .            | ALS4_539               | NUBPL    | 2.63E-05 | ././././././14.29                                                                | .                                                                                |
| 14:35203946A>T  | rs138842527  | ALS6_5609              | KIAA0391 | 0.00842  | ././benign/././././15.06                                                         | .                                                                                |
| 14:35204024T>G  | rs74752973   | ALS6_5609              | KIAA0391 | 0.008395 | ././benign/././././15.30                                                         | .                                                                                |

|                       |              |                         |          |          |                                                                                         |                                                    |
|-----------------------|--------------|-------------------------|----------|----------|-----------------------------------------------------------------------------------------|----------------------------------------------------|
| 14:35224887C>CT       | rs993242741  | ALS1_497                | DPRXP3   | 0.000237 | ./././././././13.18                                                                     | .                                                  |
| 14:36671971C>T        | rs565545610  | ALS7_5610               | PAX9     | 0.001486 | ././benign/./././././15.93                                                              | .                                                  |
| 14:36676130T>G        | .            | ALS4_539                | SLC25A21 | 0        | ././benign/./././././10.58                                                              | .                                                  |
| 14:36677543AC>A       | rs201941449  | ALS1_497;<br>ALS7_5610  | SLC25A21 | 0.005347 | ././Warning:/./././././14.05                                                            | .                                                  |
| 14:36719763T>G        | rs569626298  | ALS8_5611               | SLC25A21 | 0.000611 | ././benign/./././././14.91                                                              | .                                                  |
| 14:36734190G>C        | rs143539961  | ALS4_539                | SLC25A21 | 0.000836 | ././benign/./././././14.87                                                              | .                                                  |
| 14:36742967A>T        | rs537989009  | ALS4_539                | SLC25A21 | 0.000835 | ././benign/./././././10.14                                                              | .                                                  |
| 14:36805357C>A        | rs887879406  | ALS8_5611               | SLC25A21 | 3.29E-05 | ././benign/./././././14.97                                                              | .                                                  |
| 14:36810369G>C        | rs541899469  | ALS1_497                | SLC25A21 | 0.004254 | ././benign/./././././14.76                                                              | .                                                  |
| 14:36848617A>G        | rs537925955  | ALS6_5609;<br>ALS7_5610 | SLC25A21 | 0.002168 | ././benign/./././././12.30                                                              | .                                                  |
| 14:36880721C>A        | rs143857917  | ALS3_536                | SLC25A21 | 0.003293 | ././benign/./././././15.41                                                              | .                                                  |
| 14:36918621C>T        | rs184596038  | ALS1_497                | SLC25A21 | 0.002803 | ././benign/./././././16.65                                                              | .                                                  |
| 14:36934194A>T        | rs144214659  | ALS3_536                | SLC25A21 | 0.004929 | ././benign/./././././10.26                                                              | .                                                  |
| 14:37069879C>A        | rs184512432  | ALS7_5610               | SLC25A21 | 0.00301  | ././benign/./././././11.63                                                              | .                                                  |
| 14:37080267T>C        | rs771329095  | ALS2_503                | SLC25A21 | 5.26E-05 | ././benign/./././././12.44                                                              | .                                                  |
| 14:50249392C>T        | rs531609885  | ALS7_5610               | L2HGDH   | 0.001045 | ././benign/./././././10.19                                                              | .                                                  |
| 14:67620024A>G        | rs17185189   | ALS7_5610               | ARG2     | 0.0043   | tolerated/benign/benign/./0/0.001/1/0.525/T/10.34                                       | .                                                  |
| 14:67620335C>T        | rs559246839  | ALS6_5609               | ARG2     | 0.001376 | ././benign/./././././15.40                                                              | .                                                  |
| 14:67651918C>T        | rs181149950  | ALS4_539                | ARG2     | 0.003233 | ././benign/./././././11.18                                                              | .                                                  |
| 14:69228807C>T        | rs368100825  | ALS8_5611               | EXD2     | 9.86E-05 | ././pathogenic/./././././16.28                                                          | .                                                  |
| 14:70344337A>G        | rs142286905  | ALS2_503                | COX16    | 0.003317 | ././benign/./././././11.22                                                              | .                                                  |
| 14:70388458GC>G       | .            | ALS1_497                | SYNJ2BP  | 0        | ./././././././15.71                                                                     | .                                                  |
| 14:73950229C>T        | .            | ALS6_5609               | COQ6     | 0        | ././benign/./././././13.94                                                              | .                                                  |
| 14:73961778C>T        | rs201434148  | ALS7_5610               | COQ6     | 0.000158 | deleterious/benign/pathogenic/./0.244/0.133/1/2.205/T/2<br>4.6                          | .                                                  |
| 14:74066599T>C        | rs769234420  | ALS4_539                | ALDH6A1  | 0.000151 | ././benign/./././././12.62                                                              | .                                                  |
| 14:74882509A>G        | rs185461540  | ALS1_497                | DLST     | 0.000914 | ././benign/./././././14.22                                                              | .                                                  |
| 14:77865720T>C        | .            | ALS1_497                | ADCK1    | 0        | ././benign/./././././10.15                                                              | .                                                  |
| 14:77868965G>A        | rs775473644  | ALS4_539                | ADCK1    | 8.54E-05 | ././benign/./././././16.00                                                              | .                                                  |
| 14:93344034T>G        | rs1267890632 | ALS8_5611               | COX8C    | 0.001557 | ././benign/./././././16.75                                                              | .                                                  |
| 14:95532442A>AGG<br>T | rs532109833  | ALS5_5608               | GLRX5    | 0.002733 | ./././././././11.38                                                                     | .                                                  |
| 14:100320435T>C       | rs118060880  | ALS1_497                | SLC25A47 | 0.005227 | ././benign/./././././13.95                                                              | .                                                  |
| 15:43700427A>G        | rs397834749  | ALS3_536                | CKMT1A   | 0.004367 | ././benign/./././././16.35                                                              | .                                                  |
| 15:43700428G>T        | rs535882235  | ALS3_536                | CKMT1A   | 0.004366 | ././benign/./././././14.10                                                              | .                                                  |
| 15:45361410T>G        | rs750817737  | ALS1_497                | GATM     | 0.000946 | ././benign/Uncertain_significance/././././13.78                                         | Arginine:glycine_amidinotransfer<br>ase_deficiency |
| 15:45368101T>C        | rs759012962  | ALS4_539                | GATM     | 0        | tolerated/probably_damaging/pathogenic/Uncertain_si<br>gnificance/1/0.999/1/1.77/T/24.8 | Arginine:glycine_amidinotransfer<br>ase_deficiency |

|                 |              |                       |          |          |                                                                                       |                                                     |
|-----------------|--------------|-----------------------|----------|----------|---------------------------------------------------------------------------------------|-----------------------------------------------------|
| 15:45376722G>A  | .            | ALS6_5609             | GATM     | 0        | tolerated/benign/pathogenic/.0/0.001/0.862/-<br>0.235/T/22.3                          | .                                                   |
| 15:65027202CT>C | rs544080836  | ALS2_503;<br>ALS3_536 | MTFMT    | 0.001906 | ./././././././11.12                                                                   | .                                                   |
| 15:65175610T>C  | rs183566733  | ALS2_503              | CLPX     | 0.001525 | ././benign/././././11.74                                                              | .                                                   |
| 15:76253599C>T  | rs191775189  | ALS5_5608             | ETFA     | 0.000211 | ././benign/././././10.05                                                              | .                                                   |
| 15:76280593A>G  | rs187611885  | ALS1_497              | ETFA     | 0.000605 | ././benign/././././13.82                                                              | .                                                   |
| 15:76295259C>A  | rs1166715405 | ALS6_5609             | ETFA     | 6.57E-06 | ././benign/././././16.51                                                              | .                                                   |
| 15:76305693C>T  | rs147506144  | ALS6_5609             | ETFA     | 0.001749 | ././benign/././././12.75                                                              | .                                                   |
| 15:78168982C>T  | rs116374996  | ALS2_503              | IDH3A    | 0.002675 | deleterious/benign/pathogenic/Likely_benign/0.664/0.2<br>58/1/2.73/T/24.9             | not_provided                                        |
| 15:88476750G>A  | rs117548718  | ALS4_539              | MRPS11   | 0.006337 | ././benign/././././14.94                                                              | .                                                   |
| 15:90266255G>T  | rs201430256  | ALS6_5609             | NGRN     | 0.001525 | ././benign/././././13.93                                                              | .                                                   |
| 16:662270C>T    | rs148985409  | ALS2_503              | WDR90    | 0.003759 | tolerated/benign/benign/.1/0.998/1/1.915/T/13.49                                      | .                                                   |
| 16:1420582C>G   | rs45490596   | ALS3_536              | C16orf91 | 0.005215 | tolerated/benign/benign/.0.043/0.024/1/0.935/T/14.27                                  | .                                                   |
| 16:1772442C>G   | rs139953295  | ALS5_5608             | MRPS34   | 0.003436 | tolerated/probably_damaging/pathogenic/.0.999/0.948/<br>0.998/2.7/T/25.5              | .                                                   |
| 16:1775066C>T   | rs148313225  | ALS6_5609             | MRPS34   | 0.000604 | ././benign/.0.606/0.372/1/1.905/T/23.2                                                | .                                                   |
| 16:1778029G>A   | rs35816944   | ALS6_5609             | MRPS34   | 0.003687 | ././pathogenic/.0.969/0.558/0.999/0.72/T/25.0                                         | .                                                   |
| 16:1984584C>A   | rs550296574  | ALS4_539              | GFER     | 0.002142 | ././benign/././././10.08                                                              | .                                                   |
| 16:3721457T>G   | .            | ALS4_539              | TRAP1    | 0        | ././benign/././././12.75                                                              | .                                                   |
| 16:4441400A>G   | .            | ALS6_5609             | DNAJA3   | 0        | tolerated/benign/pathogenic/.0.285/0.091/1/0.37/T/23.5                                | .                                                   |
| 16:8682582C>G   | rs141354253  | ALS4_539              | ABAT     | 0.000406 | ././benign/././././11.69                                                              | .                                                   |
| 16:20465616G>A  | rs141326932  | ALS3_536              | ACSM2A   | 0.000276 | tolerated/benign/pathogenic/.0.052/0.091/1/0.945/T/13.6<br>5                          | .                                                   |
| 16:20794779C>A  | rs142404681  | ALS3_536              | ACSM3    | 0.005041 | ././benign/././././10.17                                                              | .                                                   |
| 16:20915595C>T  | rs149175521  | ALS5_5608             | LYRM1    | 0.000388 | deleterious/probably_damaging/pathogenic/.1/1/1/3.44<br>/D/29.1                       | .                                                   |
| 16:23556714T>G  | rs2234422    | ALS5_5608             | EARS2    | 0.005388 | ././benign/././././10.17                                                              | .                                                   |
| 16:28834571G>A  | rs7499664    | ALS5_5608             | ATXN2L   | 0.001702 | deleterious/possibly_damaging/pathogenic/.0.997/0.83<br>9/1/1.905/T/24.6              | .                                                   |
| 16:28845000T>C  | rs201756974  | ALS4_539              | TUFM     | 6.57E-05 | tolerated/benign/pathogenic/Uncertain_significance/0.0<br>18/0.009/0.958/-0.37/T/22.5 | Combined_oxidative_phosphoryl<br>ation_deficiency_4 |
| 16:68015505A>G  | rs150890440  | ALS6_5609             | DUS2     | 0.000877 | ././benign/././././12.54                                                              | .                                                   |
| 16:68085961G>T  | rs921754118  | ALS5_5608             | NFATC3   | 4.6E-05  | ././benign/././././15.31                                                              | .                                                   |
| 16:69464598T>C  | rs534941397  | ALS8_5611             | CYB5B    | 0.000447 | ././benign/././././13.88                                                              | .                                                   |
| 16:69464728G>A  | rs975433596  | ALS5_5608             | CYB5B    | 2.63E-05 | ././benign/././././11.16                                                              | .                                                   |
| 16:70156611G>A  | rs117263218  | ALS3_536              | PDPR     | 0.002775 | deleterious/probably_damaging/pathogenic/.0.999/0.93<br>6/1/2.725/D/32                | .                                                   |
| 16:70156640A>G  | rs201033817  | ALS7_5610             | PDPR     | 0.001445 | deleterious/probably_damaging/pathogenic/.1/0.998/1/<br>4.06/D/26.7                   | .                                                   |

|                            |              |                       |          |          |                                                                              |                                |
|----------------------------|--------------|-----------------------|----------|----------|------------------------------------------------------------------------------|--------------------------------|
| 16:80981911C>T             | .            | ALS5_5608             | CMC2     | 0        | ././benign/././././15.00                                                     | .                              |
| 16:85800009C>A             | rs898250068  | ALS8_5611             | COX4I1   | 0.000657 | ././benign/././././17.75                                                     | .                              |
| 17:4949611AGGGC<br>GGGAC>A | rs528614399  | ALS3_536              | PFN1     | 0.000355 | ./././././././10.86                                                          | .                              |
| 17:7207348GAGCC><br>G      | rs543025747  | ALS8_5611             | SLC25A35 | 0.004747 | ./././././././13.76                                                          | .                              |
| 17:7211821C>CGG            | rs1318925894 | ALS6_5609             | SLC25A35 | 0.002996 | ./././././././12.36                                                          | .                              |
| 17:8292555C>T              | rs146737646  | ALS6_5609             | SLC25A35 | 0.000434 | tolerated/benign/benign/./0.629/0.326/0.961/0.73/T/23.5                      | .                              |
| 17:8299016A>G              | rs146571796  | ALS5_5608             | SLC25A35 | 0.005492 | ././benign/././././11.57                                                     | .                              |
| 17:14083986C>A             | rs116935344  | ALS4_539              | COX10    | 0.002598 | ././benign/././././12.09                                                     | .                              |
| 17:14147952T>C             | rs73979168   | ALS2_503              | COX10    | 0.008693 | ././benign/././././10.68                                                     | .                              |
| 17:18255257C>T             | rs138000313  | ALS8_5611             | FLII     | 0.000795 | tolerated/possibly_damaging/pathogenic/./1/0.914/1/1.7<br>5/T/22.9           | .                              |
| 17:18315487G>A             | rs139090902  | ALS2_503              | TOP3A    | 0.003593 | ././benign/././././14.98                                                     | .                              |
| 17:19665048G>A             | .            | ALS1_497              | ALDH3A2  | 0        | ././pathogenic/Likely_pathogenic/./1/././34                                  | <b>Sjgren-Larsson_syndrome</b> |
| 17:21132892AT>A            | rs531121612  | ALS3_536<br>;ALS4_539 | DHRS7B   | 0.001089 | ./././././././10.29                                                          | .                              |
| 17:32208185A>G             | rs139664057  | ALS5_5608             | RHOT1    | 0.000532 | tolerated/benign/benign/./0.002/0.002/1/-0.565/T/16.99                       | .                              |
| 17:37164226C>T             | rs79949332   | ALS1_497              | ACACA    | 0.007489 | ././pathogenic/././././18.50                                                 | .                              |
| 17:37176896T>A             | rs149221856  | ALS1_497              | ACACA    | 0.002932 | ././benign/././././15.72                                                     | .                              |
| 17:37202553T>TA            | rs1208918443 | ALS2_503              | ACACA    | 0.000946 | ./././././././15.12                                                          | .                              |
| 17:37233460G>A             | rs12937687   | ALS4_539              | ACACA    | 0.003929 | ././pathogenic/././././18.04                                                 | .                              |
| 17:38731375T>A             | .            | ALS7_5610             | CISD3    | 6.58E-06 | deleterious/possibly_damaging/pathogenic/./0.921/0.69<br>1/0.831/2.27/T/26.9 | .                              |
| 17:42568087C>T             | rs541382133  | ALS6_5609             | COASY    | 0.00021  | ././benign/././././12.07                                                     | .                              |
| 17:43199739C>T             | rs1384764445 | ALS2_503              | NBR1     | 0        | ././benign/././././10.14                                                     | .                              |
| 17:43216403A>G             | rs201122046  | ALS8_5611             | NBR1     | 0.000315 | ././benign/././././15.50                                                     | .                              |
| 17:50115869C>T             | rs80248520   | ALS8_5611             | PDK2     | 0.003403 | ././pathogenic/./1/0.982/0.958/1.995/T/28.1                                  | .                              |
| 17:50362160A>T             | rs546433529  | ALS1_497              | XYLT2    | 3.94E-05 | ././benign/././././15.80                                                     | .                              |
| 17:50540181G>A             | rs781087683  | ALS3_536              | SPATA20  | 0.000585 | ././benign/././././15.02                                                     | .                              |
| 17:50565009A>G             | .            | ALS5_5608             | CACNA1G  | 0        | ././benign/././././17.67                                                     | .                              |
| 17:57075202T>C             | rs72843409   | ALS7_5610             | AKAP1    | 0.00262  | ././benign/././././10.55                                                     | .                              |
| 17:57840922T>G             | rs938915754  | ALS2_503              | MRPS23   | 0        | ././pathogenic/./././1/././22.5                                              | .                              |
| 17:58518972C>G             | rs1008716867 | ALS2_503              | SEPT4    | 1.97E-05 | ././benign/././././11.74                                                     | .                              |
| 17:58531444T>C             | rs150891701  | ALS7_5610             | SEPT4    | 0.005749 | ././benign/././././10.01                                                     | .                              |
| 17:59694241C>T             | rs145708582  | ALS6_5609             | PTRH2    | 0.004233 | ././benign/././././11.73                                                     | .                              |
| 17:68984907G>T             | rs148927389  | ALS7_5610             | ABCA9    | 0.004694 | deleterious/probably_damaging/pathogenic/./0.999/0.99<br>5/1/2.96/D/23.4     | .                              |
| 17:69027383C>T             | rs79212004   | ALS3_536              | ABCA9    | 0.00161  | tolerated/possibly_damaging/pathogenic/./0.923/0.559/1<br>/3.48/T/21.3       | .                              |
| 17:75047230C>A             | rs1268258474 | ALS6_5609             | ATP5PD   | 1.35E-05 | ././benign/././././13.42                                                     | .                              |

|                    |              |           |          |          |                                                                       |                                             |
|--------------------|--------------|-----------|----------|----------|-----------------------------------------------------------------------|---------------------------------------------|
| 17:75047949C>A     | rs547077735  | ALS5_5608 | ATP5PD   | 0.002228 | ././benign/././././13.09                                              | .                                           |
| 17:75266752T>A     | rs138489085  | ALS4_539  | MRPS7    | 0.000164 | ././pathogenic/./0.993/0.967/1/2.085/T/23.6                           | .                                           |
| 17:75292549CT>C    | rs757201892  | ALS2_503  | SLC25A19 | 0.002038 | ./././././././10.64                                                   | .                                           |
| 17:75914150C>T     | rs773400065  | ALS4_539  | FBF1     | 1.97E-05 | deleterious/benign/benign/./0.887/0.179/0.996/2.6/T/22.5              | .                                           |
| 17:78378682C>T     | rs200541156  | ALS3_536  | PGS1     | 0.005688 | tolerated/probably_damaging/pathogenic/./0.98/0.935/0.605/0.69/T/22.9 | .                                           |
| 17:78403579G>A     | rs201765653  | ALS1_497  | PGS1     | 5.92E-05 | tolerated/benign/benign/./0.008/0.001/1/-0.26/T/17.22                 | .                                           |
| 17:81924943T>C     | rs757356237  | ALS8_5611 | MAFG     | 0.000105 | ././benign/././././15.90                                              | .                                           |
| 18:2541907T>C      | .            | ALS3_536  | METTL4   | 0        | ././benign/././././14.95                                              | .                                           |
| 18:2574875T>G      | rs186283183  | ALS8_5611 | METTL4   | 0.003127 | ././benign/././././22.1                                               | .                                           |
| 18:9119262T>C      | rs41274296   | ALS6_5609 | NDUFV2   | 0.005907 | ././benign/Likely_benign/././././10.75                                | not_provided                                |
| 18:9138684A>G      | rs75099041   | ALS6_5609 | NDUFV2   | 0.005918 | ././pathogenic/././././19.00                                          | .                                           |
| 18:9141620G>T      | rs184360741  | ALS1_497  | NDUFV2   | 0.002853 | ././benign/././././12.42                                              | .                                           |
| 18:9142305T>C      | rs117942008  | ALS6_5609 | NDUFV2   | 0.002608 | ././benign/././././11.59                                              | .                                           |
| 18:12322543TG>T    | rs535384834  | ALS3_536  | TUBB6    | 0.000671 | ./././././././13.00                                                   | .                                           |
| 18:12377153G>A     | rs571340907  | ALS4_539  | AFG3L2   | 0.005938 | ././benign/Benign/Likely_benign/././././10.02                         | Spinocerebellar_ataxia_type_28 not_provided |
| 18:12466248T>C     | rs1020573012 | ALS4_539  | SPIRE1   | 3.94E-05 | ././benign/././././13.38                                              | .                                           |
| 18:12471091C>T     | rs529668495  | ALS7_5610 | SPIRE1   | 0.00627  | ././benign/././././11.08                                              | .                                           |
| 18:12479755G>C     | rs373281197  | ALS1_497  | SPIRE1   | 1.31E-05 | deleterious/benign/benign/./0.333/0.108/0.538/2.975/T/20.6            | .                                           |
| 18:13681911A>C     | rs151157304  | ALS4_539  | FAM210A  | 3.29E-05 | deleterious/probably_damaging/pathogenic/./1/0.999/0.993/2.505/T/24.6 | .                                           |
| 18:13726581G>T     | rs554143670  | ALS3_536  | FAM210A  | 0.00023  | ././pathogenic/././././19.76                                          | .                                           |
| 18:13731836A>G     | rs143290824  | ALS3_536  | RNMT     | 0.00023  | tolerated/benign/benign/./0.157/0.051/0.998/0.69/T/15.78              | .                                           |
| 18:24234511T>C     | rs61125050   | ALS1_497  | OSBPL1A  | 0.008674 | ././benign/././././11.88                                              | .                                           |
| 18:24264254G>GA    | rs371588904  | ALS1_497  | OSBPL1A  | 0.010224 | ./././././././15.54                                                   | .                                           |
| 18:24395155C>T     | rs146527591  | ALS8_5611 | OSBPL1A  | 0.004764 | ././benign/././././15.37                                              | .                                           |
| 18:46084534C>T     | .            | ALS4_539  | ATP5F1A  | 0        | tolerated/benign/pathogenic/./0/0.002/1/1.235/T/22.4                  | .                                           |
| 18:50881524G>T     | rs1337541880 | ALS3_536  | ME2      | 0        | ././benign/././././13.50                                              | .                                           |
| 18:63152365T>G     | rs144031174  | ALS6_5609 | BCL2     | 0.004447 | ././benign/././././13.68                                              | .                                           |
| 18:63155666A>T     | rs977024450  | ALS7_5610 | BCL2     | 7.89E-05 | ././benign/././././11.15                                              | .                                           |
| 18:63253835GA>G    | rs1346311538 | ALS2_503  | BCL2     | 0.001813 | ./././././././15.29                                                   | .                                           |
| 18:63320237GAAGA>G | rs1037532057 | ALS8_5611 | BCL2     | 0.000149 | ./././././././14.96                                                   | .                                           |
| 18:75204513C>T     | rs764292109  | ALS3_536  | ZADH2    | 0.00111  | ././benign/././././10.23                                              | .                                           |
| 18:80055904C>G     | rs540444302  | ALS1_497  | RBFADN   | 0.000204 | ././benign/././././13.14                                              | .                                           |
| 19:635424C>T       | rs541034247  | ALS1_497  | POLRMT   | 0.000171 | ././benign/././././14.19                                              | .                                           |
| 19:1113681C>T      | rs765765176  | ALS2_503  | SBNO2    | 1.31E-05 | tolerated/benign/pathogenic/./0.1/0.073/0.611/1.95/T/19.60            | .                                           |

|                 |              |                        |                |          |                                                                          |                |
|-----------------|--------------|------------------------|----------------|----------|--------------------------------------------------------------------------|----------------|
| 19:1248497G>C   | rs1007783413 | ALS8_5611              | ATP5F1D        | 0.000102 | ././benign/././././16.70                                                 | .              |
| 19:1248501G>C   | rs1019127196 | ALS8_5611              | ATP5F1D        | 8.46E-05 | ././benign/././././12.39                                                 | .              |
| 19:1248509G>C   | rs1458908167 | ALS8_5611              | ATP5F1D        | 0.000274 | ././benign/././././16.85                                                 | .              |
| 19:2434019C>T   | rs555606326  | ALS6_5609              | LMNB2          | 1.31E-05 | deleterious/probably_damaging/benign/./0.998/0.847/0.991/1.335/T/24.9    | .              |
| 19:3759732G>A   | rs138562152  | ALS5_5608              | MRPL54         | 0.001072 | ././benign/./0.27/0.026/0.968/1.4/T/15.79                                | .              |
| 19:5692106C>T   | rs367780804  | ALS2_503               | LONP1          | 0.000143 | deleterious/probably_damaging/pathogenic/./1/0.998/1/3.72/D/26.9         | .              |
| 19:5720218C>T   | rs112324623  | ALS7_5610              | LONP1          | 0.002325 | ././benign/Likely_benign/././././12.72                                   | CODAS_syndrome |
| 19:6432083G>A   | rs200270386  | ALS7_5610              | SLC25A41       | 0.000243 | deleterious/probably_damaging/pathogenic/./1/0.957/1/2.9/D/25.5          | .              |
| 19:6464292G>A   | rs569671916  | ALS7_5610              | SLC25A23       | 0.000801 | ././benign/././././14.94                                                 | .              |
| 19:8307860C>T   | rs180797395  | ALS6_5609              | NDUFA7         | 0.003096 | ././benign/././././12.38                                                 | .              |
| 19:10259727T>C  | rs142765226  | ALS6_5609              | MRPL4          | 0.001224 | tolerated/benign/pathogenic/./0.152/0.059/1/0/T/20.8                     | .              |
| 19:11529580C>T  | rs150929921  | ALS4_539               | ECSIT          | 0.00079  | ././benign/././././11.93                                                 | .              |
| 19:12788836C>T  | rs1009172567 | ALS8_5611              | JUNB           | 6.57E-06 | ././benign/././././16.51                                                 | .              |
| 19:12790369T>C  | rs562884462  | ALS7_5610              | JUNB           | 0.001769 | ././benign/././././18.83                                                 | .              |
| 19:12954497T>C  | rs149233851  | ALS7_5610              | GADD45G<br>IP1 | 0.00209  | deleterious/possibly_damaging/pathogenic/./0.907/0.524/0.958/2.28/T/26.0 | .              |
| 19:13096950G>GA | rs112879585  | ALS4_539               | NFIX           | 0.002929 | ././././././14.60                                                        | .              |
| 19:13109979A>C  | rs771096015  | ALS1_497               | TRMT1          | 1.31E-05 | deleterious/probably_damaging/pathogenic/./1/1/1/4.14/D/32               | .              |
| 19:14118204G>C  | rs1032868709 | ALS7_5610              | PRKACA         | 0.003808 | ././benign/././././19.30                                                 | .              |
| 19:14118233G>A  | rs1420557074 | ALS5_5608              | PRKACA         | 2.03E-05 | ././benign/././././18.65                                                 | .              |
| 19:14560229G>T  | rs1978626    | ALS1_497               | TECR           | 0.001108 | ././benign/././././12.02                                                 | .              |
| 19:18545339CT>C | rs576891720  | ALS3_536               | FKBP8          | 0.000975 | ././././././12.12                                                        | .              |
| 19:19535632C>G  | rs146733860  | ALS1_497               | YJEFN3         | 0.005283 | tolerated/probably_damaging/benign/./1/0.992/1/1.83/T/23.6               | .              |
| 19:32895750T>TA | rs113777086  | ALS1_497               | CEP89          | 0.003457 | ././././././10.54                                                        | .              |
| 19:35807078AG>A | rs755582106  | ALS6_5609              | PRODH2         | 0.000388 | ././././././32                                                           | .              |
| 19:38907561C>T  | rs187346322  | ALS4_539               | NFKBIB         | 0.000525 | tolerated/benign/benign/./0.009/0.005/0.994/2.42/T/21.1                  | .              |
| 19:41426222G>A  | rs137913069  | ALS2_503               | BCKDHA         | 0.002182 | ././pathogenic/./1/0.989/0.968/1.5/T/24.8                                | .              |
| 19:43525635C>T  | rs750638520  | ALS1_497               | ETHE1          | 0.000177 | ././benign/././././14.12                                                 | .              |
| 19:44883203A>G  | rs76725281   | ALS3_536;<br>ALS7_5610 | NECTIN2        | 0.015928 | ././benign/././././11.67                                                 | .              |
| 19:45591958T>G  | rs536994157  | ALS1_497               | OPA3           | 0.004576 | ././pathogenic/././././15.87                                             | .              |
| 19:45767559G>A  | rs138291642  | ALS6_5609              | DMPK           | 0.003042 | ././benign/././././19.16                                                 | .              |
| 19:47230968G>A  | rs901494477  | ALS2_503               | BBC3           | 8.56E-05 | ././benign/././././18.57                                                 | .              |
| 19:47232589A>G  | rs45477493   | ALS2_503               | BBC3           | 0.002936 | deleterious/benign/benign/./0.013/0.004/1/0/T/12.56                      | .              |
| 19:48332539T>G  | rs1316711001 | ALS3_536               | TMEM143        | 6.57E-06 | ././benign/././././12.46                                                 | .              |
| 19:48629592T>C  | rs754083757  | ALS8_5611              | SPHK2          | 0        | tolerated/benign/benign/./0.989/0.648/1/1.74/T/22.6                      | .              |

|                                |              |           |         |          |                                                                      |              |
|--------------------------------|--------------|-----------|---------|----------|----------------------------------------------------------------------|--------------|
| 19:48635643G>C                 | rs555937572  | ALS6_5609 | SPHK2   | 0.00173  | ././benign/./0.369/0.091/0.915/1.5/T/20.8                            | .            |
| 19:51368599G>A                 | rs138507210  | ALS7_5610 | ETFB    | 0.01083  | ././benign/./././././12.78                                           | .            |
| 19:55062802G>GAC<br>CTGGCCGCC  | rs1359976349 | ALS1_497  | RDH13   | 0.001064 | ./././././././13.74                                                  | .            |
| 19:55361093C>T                 | rs145275620  | ALS1_497  | FAM71E2 | 0.003461 | tolerated/benign/benign/./0.013/0.005/1/0.345/T/11.72                | .            |
| 19:55464389T>G                 | rs1055912659 | ALS3_536  | ISOC2   | 1.32E-05 | ././benign/./././././22.0                                            | .            |
| 20:2655111ATAGA<br>AAGAGGAGG>A | .            | ALS5_5608 | IDH3B   | 0        | ./././././././18.42                                                  | .            |
| 20:3168342G>A                  | rs180708780  | ALS4_539  | LZTS3   | 0.001547 | ././benign/./././././15.89                                           | .            |
| 20:3880500G>A                  | rs186126558  | ALS7_5610 | MAVS    | 0.006105 | ././benign/./././././11.98                                           | .            |
| 20:3891972G>T                  | rs185319894  | ALS4_539  | PANK2   | 0.001321 | ././benign/./././././11.43                                           | .            |
| 20:6006764A>G                  | .            | ALS2_503  | CRLS1   | 0        | ././benign/./././././10.13                                           | .            |
| 20:6019560T>C                  | rs149361586  | ALS6_5609 | CRLS1   | 0.005823 | ././benign/./././././12.45                                           | .            |
| 20:31669244G>A                 | rs138191924  | ALS7_5610 | BCL2L1  | 0.002846 | ././benign/./././././13.94                                           | .            |
| 20:31694415G>A                 | rs73117919   | ALS5_5608 | BCL2L1  | 0.001026 | ././benign/./././././19.08                                           | .            |
| 20:31723587C>T                 | rs571505406  | ALS5_5608 | BCL2L1  | 0.005829 | ././benign/./././././17.40                                           | .            |
| 20:35662961CAAA<br>GT>C        | rs548165033  | ALS7_5610 | CPNE1   | 0.00161  | ./././././././12.27                                                  | .            |
| 20:44966567C>G                 | rs190920315  | ALS4_539  | STK4    | 0.002733 | ././pathogenic/./././././21.1                                        | .            |
| 20:54169957T>A                 | rs149998531  | ALS3_536  | CYP24A1 | 0.004154 | ././benign/./././././13.49                                           | .            |
| 21:31671122AAAAAT<br>>A        | rs1057273288 | ALS2_503  | SOD1    | 0.001078 | ./././././././12.93                                                  | .            |
| 21:33909192T>C                 | rs140827929  | ALS3_536  | ATP5PO  | 0.003888 | tolerated/benign/pathogenic/./0.024/0.08/1/2.145/T/23.0              | .            |
| 21:34074476G>C                 | rs115729130  | ALS3_536  | MRPS6   | 0.006472 | ././benign/./././././17.75                                           | .            |
| 21:34074488C>A                 | rs553429190  | ALS3_536  | MRPS6   | 0.000269 | ././benign/./././././17.40                                           | .            |
| 21:34097704A>T                 | rs115860747  | ALS3_536  | MRPS6   | 0.004703 | ././benign/./././././13.07                                           | .            |
| 21:34105041CTT>C               | rs146361117  | ALS3_536  | MRPS6   | 0.005346 | ./././././././10.19                                                  | .            |
| 21:34113185C>T                 | rs114699237  | ALS3_536  | MRPS6   | 0.005293 | ././benign/./././././12.51                                           | .            |
| 21:46287125T>TAA<br>AAAAA      | rs58271568   | ALS3_536  | YBEY    | 0.00087  | ./././././././16.27                                                  | .            |
| 22:19930742G>A                 | rs189705806  | ALS5_5608 | TXNRD2  | 0.000801 | ././benign/./././././11.64                                           | .            |
| 22:19949559G>C                 | rs188233565  | ALS4_539  | COMT    | 0.000964 | ././benign/./././././13.00                                           | .            |
| 22:19971942G>A                 | rs34687532   | ALS5_5608 | COMT    | 0.00067  | ././benign/./0.007/0.004/0.873/1.5/T/17.97                           | .            |
| 22:19972989A>G                 | rs115344498  | ALS2_503  | COMT    | 0.001303 | ././pathogenic/Likely_benign/0.005/0.007/0.999/2.275/T/2<br>3.6      | not_provided |
| 22:23768447A>G                 | rs555114361  | ALS8_5611 | CHCHD10 | 0.005464 | ././benign/./././././13.00                                           | .            |
| 22:37024382G>T                 | rs201058049  | ALS6_5609 | MPST    | 0.002615 | deleterious/probably_damaging/pathogenic/./1/0.997/1/<br>4.92/D/25.1 | .            |
| 22:40896050T>A                 | rs148928334  | ALS4_539  | XPNPEP3 | 0.000276 | ././benign/./././././12.07                                           | .            |

|                        |              |           |         |          |                                                                                              |                                                                                                      |
|------------------------|--------------|-----------|---------|----------|----------------------------------------------------------------------------------------------|------------------------------------------------------------------------------------------------------|
| 22:41515801G>C         | rs141878785  | ALS7_5610 | ACO2    | 0.000933 | deleterious/possibly_damaging/pathogenic/Uncertain_<br>significance/0.861/0.62/1/2.57/D/24.7 | Retinal_dystrophy Infantile_cereb<br>ellar-<br>retinal_degeneration Optic_atrop<br>hy_9 not_provided |
| 22:42076885G>C         | rs537373965  | ALS5_5608 | SMDT1   | 0.001578 | ././benign/././././12.52                                                                     | .                                                                                                    |
| 22:42086248G>A         | rs113437301  | ALS5_5608 | NDUFA6  | 0.003719 | tolerated/benign/pathogenic/Likely_benign/0.008/0.004/<br>0.999/1.3/T/22.5                   | not_specified                                                                                        |
| 22:42615296C>T         | rs148484665  | ALS8_5611 | CYB5R3  | 0.006204 | ././pathogenic/././././18.56                                                                 | .                                                                                                    |
| 22:42615315C>T         | rs180887630  | ALS1_497  | CYB5R3  | 0.002907 | ././pathogenic/././././15.91                                                                 | .                                                                                                    |
| 22:42640000ATCTC<br>>A | rs761239976  | ALS5_5608 | CYB5R3  | 1.31E-05 | ././././././22.6                                                                             | .                                                                                                    |
| 22:50573628C>T         | rs144936442  | ALS5_5608 | CPT1B   | 3.94E-05 | deleterious/possibly_damaging/benign/./0.999/0.92/0.99<br>9/2.77/D/22.8                      | .                                                                                                    |
| 22:50582829C>A         | rs41282357   | ALS6_5609 | CPT1B   | 0.006557 | ././benign/Benign/././././16.62                                                              | Megaconial_type_congenital_mus<br>cular_dystrophy not_provided                                       |
| X:1388460C>T           | rs1365596781 | ALS2_503  | SLC25A6 | 0.000577 | ././././././10.61                                                                            | .                                                                                                    |
| X:24459860C>T          | rs753480552  | ALS7_5610 | NA      | 0.003647 | ././././././11.24                                                                            | .                                                                                                    |
| X:24489234A>G          | .            | ALS6_5609 | PDK3    |          | ././././././15.99                                                                            | .                                                                                                    |
| X:55028316G>A          | rs143742765  | ALS3_536  | ALAS2   | 0.003912 | ././././././11.18                                                                            | .                                                                                                    |
| X:91443567A>G          | .            | ALS6_5609 | PABPC5  |          | ././././././10.07                                                                            | .                                                                                                    |
| X:119470504C>T         | rs747700813  | ALS2_503  | SLC25A5 | 0.001639 | tolerated/benign/././0.583/0.055/1/2.935/T/23.6                                              | .                                                                                                    |
| X:155055309A>G         | rs933583357  | ALS1_497  | FUNDC2  | 0.000134 | ././././././11.17                                                                            | .                                                                                                    |
| X:155066486AAG>A       | rs1257819775 | ALS7_5610 | CMC4    | 6.22E-05 | ././././././15.20                                                                            | .                                                                                                    |



**Table S8.** Fifty-two prioritized mtDNA variants sites in the WGS cohort

| Locus                          | Nucleotide/ AA change | Variant ID  | Variant nature | Cases     | AF_Hom     | AF_Het      | Pathogenicity (Hmtdb)   | ClinVarSignificance/MutPred_Prediction/Panther_Prediction/PhDSNP_Prediction/SNPsGO_Prediction/Polyphen2HumDiv_Prediction/Polyphen2HumVar_Prediction | pon_tRNA/MitoTIP_prediction | Mitomap Disease |
|--------------------------------|-----------------------|-------------|----------------|-----------|------------|-------------|-------------------------|-----------------------------------------------------------------------------------------------------------------------------------------------------|-----------------------------|-----------------|
| CR -HV2                        | 65TG>T/.              | .           | Het            | ALS3_536  |            | 0.000659548 |                         | ././././././                                                                                                                                        | ./.                         |                 |
| CR - HV2                       | 143G>A/.              | rs375589100 | Het            | ALS3_536  |            | 0.000141781 | pending classification, | ././././././                                                                                                                                        | ./.                         | -               |
| CR - HV2                       | 183A>G/.              | rs113913230 | Hom            | ALS1_497  | 0.00846135 |             | pending classification, | ././././././                                                                                                                                        | ./.                         | -               |
| CR - HV2                       | 204T>C/.              | rs3135032   | Het            | ALS7_5610 |            | 0.00498455  | pending classification, | ././././././                                                                                                                                        | ./.                         | -               |
| CR - HV2 - TFX mtTF1 bind site | 247G>T/.              | rs41334645  | Het            | ALS6_5609 |            | 0           | -                       | ././././././                                                                                                                                        | ./.                         | -               |
| CR - HV3 - TFL mtTF1 bind site | 539T>A/.              | .           | Het            | ALS6_5609 |            | 0           | -                       | ././././././                                                                                                                                        | ./.                         | -               |
| 12 S                           | 1474G>A/.             | .           | Het            | ALS1_497  |            | 0           | pending classification, | ././././././                                                                                                                                        | ./.                         | -               |
| 12 S                           | 1485G>A/.             | .           | Het            | ALS2_503  |            | 1.77208E-05 | -                       | ././././././                                                                                                                                        | ./.                         | -               |
| 12 S                           | 1589C>T/.             | .           | Het            | ALS3_536  |            | 0           | -                       | ././././././                                                                                                                                        | ./.                         | -               |
| MT-TV                          | 1664G>A/.             | rs200807305 | Het            | ALS1_497  |            | 0.000106349 | polymorphic, , tRNA     | Benign/./././././                                                                                                                                   | Neutral/likely _benign      | -               |
| 16 S                           | 1700T>C/.             | rs2854126   | Hom            | ALS7_5610 | 0.00781471 |             | pending classification, | ././././././                                                                                                                                        | ./.                         | -               |

|        |               |              |     |           |             |                         |                                                                                      |                               |                      |
|--------|---------------|--------------|-----|-----------|-------------|-------------------------|--------------------------------------------------------------------------------------|-------------------------------|----------------------|
| 16 S   | 1770G>A/.     | .            | Het | ALS1_497  | 0.000017723 | -                       | ././././././                                                                         | ./.                           | -                    |
| 16 S   | 2571G>A/.     | rs28683810   | Het | ALS2_503  | 1.77261E-05 | pending classification, | ././././././                                                                         | ./.                           | -                    |
| MT-ND1 | 3380G>A/R25Q  | rs1603218926 | Het | ALS7_5610 | 0           | pathogenic              | Pathogenic/high_pathogenicity/./neutral/disease/probably_damaging/probably_damaging/ | ./.                           | MELAS                |
| MT-ND1 | 3454G>A/A50T  | .            | Het | ALS2_503  | 1.77214E-05 | pathogenic              | ./high_pathogenicity/neutral/disease/neutral/probably_damaging/probably_damaging/    | ./.                           | -                    |
| MT-ND1 | 3550G>A/A82T  | .            | Het | ALS1_497  | 0           | likely_benign           | ./low_pathogenicity/neutral/neutral/neutral/benign/benign/                           | ./.                           | -                    |
| MT-ND1 | 3796A>G/T164A | rs28357970   | Hom | ALS1_497  | 0.0082589   | benign                  | Benign/low_pathogenicity/neutral/neutral/neutral/benign/benign/                      | ./.                           | Adult-Onset Dystonia |
| MT-ND1 | 3952G>A/A216T | rs1603219215 | Het | ALS1_497  | 0           | pathogenic              | ./low_pathogenicity/neutral/disease/neutral/possibly_damaging/possibly_damaging/     | ./.                           | -                    |
| MT-TI  | 4310A>G/.     | rs1556422841 | Het | ALS7_5610 | 3.54465E-05 | polymorphic, , tRNA     | Benign/./././././                                                                    | Neutral/likely_benign         | -                    |
| MT-ND2 | 4996G>A/R176H | rs1603219712 | Het | ALS7_5610 | .           | pathogenic              | ./high_pathogenicity/disease/disease/disease/benign/benign/                          | ./.                           | -                    |
| MT-TA  | 5623G>A/.     | .            | Het | ALS1_497  | .           | polymorphic, , tRNA     | ././././././                                                                         | Likely_neutral /likely_benign | -                    |
| MT-CO1 | 6840G>A/A313T | .            | Het | ALS1_497  | 1.77242E-05 | pathogenic              | ./high_pathogenicity/disease/disease/disease/probably_damaging/probably_damaging/    | ./.                           | -                    |
| MT-CO1 | 6891A>G/S330G | rs879091068  | Hom | ALS5_5608 | 0.000513947 | likely_benign           | Benign/low_pathogenicity/neutral/neutral/neutral/benign/benign/                      | ./.                           | -                    |

|                     |                    |                  |     |                       |                 |                 |                         |                                                                                                                               |     |                              |
|---------------------|--------------------|------------------|-----|-----------------------|-----------------|-----------------|-------------------------|-------------------------------------------------------------------------------------------------------------------------------|-----|------------------------------|
| MT-CO1              | 7341C>A/R480X      | .                | Het | ALS2_503              | .               | .               | pending classification, | ././././././                                                                                                                  | ./. | -                            |
| MT-CO2              | 7793G>A/A70T       | .                | Het | ALS1_497;<br>ALS2_503 | 0               | 0               | pathogenic              | ./low_pathogenicity/./disease/neutral/probably_d<br>amaging/probably_damaging/                                                | ./. | -                            |
| MT-ATP6-<br>MT-ATP8 | 8557G>A/A11T       | rs386829040      | Hom | ALS1_497              | 0.00843732      |                 | benign                  | Benign/low_pathogenicity/neutral/neutral/neutra<br>l/benign/benign/                                                           | ./. | -                            |
| MT-ATP6             | 8584G>A/A20T       | rs3135028        | Het | ALS1_497              |                 | 8.86509E-<br>05 | benign                  | Benign/low_pathogenicity/neutral/neutral/neutra<br>l/benign/benign/                                                           | ./. | -                            |
| MT-ATP6             | 9145G>A/A207T      | rs155642362<br>2 | Het | ALS2_503              |                 | 5.31736E-<br>05 | likely_pathogeni<br>c   | Benign/low_pathogenicity/./disease/disease/prob<br>ably_damaging/probably_damaging/                                           | ./. | -                            |
| MT-ND4L             | 10677G>A/E70K      | rs160322294<br>4 | Het | ALS7_5610             |                 | 0               | pathogenic              | Uncertain_significance/high_pathogenicity/disea<br>se/disease/disease/benign/benign/                                          | ./. | -                            |
| MT-ND4              | 11004G>T/R82L      | .                | Het | ALS7_5610             |                 | .               | likely_benign           | ./low_pathogenicity/./neutral/neutral/benign/ben<br>ign/                                                                      | ./. | -                            |
| MT-ND4              | 11031GA>G/.        | rs155642388<br>4 | Het | ALS7_5610             |                 | 0               |                         | Uncertain_significance/./././././                                                                                             | ./. | -                            |
| MT-ND4              | 11456G>A/A233<br>T | .                | Het | ALS1_497              |                 | 0               | pathogenic              | ./low_pathogenicity/neutral/disease/neutral/prob<br>ably_damaging/probably_damaging/                                          | ./. | -                            |
| MT-ND5              | 12818G>A/R161<br>Q | .                | Het | ALS7_5610             |                 | 0               | pathogenic              | ./high_pathogenicity/disease/neutral/disease/pro<br>bably_damaging/probably_damaging/                                         | ./. | -                            |
| MT-ND5              | 12820G>A/A162<br>T | rs200567053      | Hom | ALS3_536              | 0.00017721<br>4 |                 | likely_benign           | Benign/low_pathogenicity/disease/neutral/neutra<br>l/benign/benign/                                                           | ./. | -                            |
| MT-ND5              | 12889G>A/A185<br>T | rs155642418<br>5 | Het | ALS1_497;<br>ALS2_503 |                 | 0.00010637      | likely_benign           | Uncertain_significance/low_pathogenicity/diseas<br>e/neutral/neutral/benign/benign/                                           | ./. | -                            |
| MT-ND5              | 13528A>G/T398<br>A | rs55882959       | Hom | ALS6_5609             | 0.00209142      |                 | likely_pathogeni<br>c   | Conflicting_interpretations_of_pathogenicity/lo<br>w_pathogenicity/./neutral/neutral/probably_dam<br>aging/probably_damaging/ | ./. | LHON-like,<br>LHON,<br>MELAS |

|        |                |              |     |                       |             |             |                   |                                                                                                       |     |                                                                |
|--------|----------------|--------------|-----|-----------------------|-------------|-------------|-------------------|-------------------------------------------------------------------------------------------------------|-----|----------------------------------------------------------------|
| MT-ND5 | 13565C>T/S410F | rs56039545   | Hom | ALS6_5609             | 0.00166569  |             | likely_pathogenic | Benign/low_pathogenicity/neutral/neutral/neutral/probably_damaging/probably_damaging/                 | ./. | -                                                              |
| MT-ND5 | 13810G>A/A492T | rs1603224361 | Het | ALS1_497;<br>ALS2_503 |             | 1.77223E-05 | benign            | Benign/low_pathogenicity/disease/neutral/neutral/benign/benign/                                       | ./. | -                                                              |
| MT-ND5 | 14047A>G/I571V | rs1603224486 | Hom | ALS1_497;<br>ALS2_504 | 0.000230366 |             | likely_benign     | Likely_benign/low_pathogenicity/neutral/neutral/neutral/benign/benign/                                | ./. | -                                                              |
| MT-ND6 | 14384G>A/A97V  | rs1556424435 | Het | ALS1_497;<br>ALS2_503 |             | 8.86211E-05 | benign            | Benign/low_pathogenicity/neutral/neutral/neutral/benign/benign/                                       | ./. | -                                                              |
| MT-ND6 | 14459G>A/A72V  | rs199476105  | Het | ALS7_5610             |             | 1.77204E-05 | pathogenic        | Pathogenic/low_pathogenicity/disease/disease/disease/probably_damaging/probably_damaging/             | ./. | LDYT / Leigh Disease / dystonia / carotid atherosclerosis risk |
| MT-ND6 | 14577T>G/I33L  | rs386829219  | Hom | ALS2_503              | 0.000212642 |             | benign            | Likely_benign/low_pathogenicity/neutral/neutral/disease/benign/benign/                                | ./. | -                                                              |
| MT-CYB | 14750A>G/T2A   | rs1603224853 | Hom | ALS6_5609             | 0.0009393   |             | benign            | Benign/low_pathogenicity/neutral/neutral/neutral/benign/benign/                                       | ./. | -                                                              |
| MT-CYB | 14861G>A/A39T  | rs2853505    | Het | ALS1_497              |             | 0.000141834 | benign            | Benign/low_pathogenicity/neutral/neutral/neutral/benign/benign/                                       | ./. | -                                                              |
| MT-CYB | 14921G>A/A59T  | rs1603224964 | Het | ALS2_503              |             | 0           | pathogenic        | Uncertain_significance/low_pathogenicity/neutral/neutral/neutral/probably_damaging/probably_damaging/ | ./. | -                                                              |

|                 |                |              |     |                       |             |            |                                                                                                       |     |   |
|-----------------|----------------|--------------|-----|-----------------------|-------------|------------|-------------------------------------------------------------------------------------------------------|-----|---|
| MT-CYB          | 15005G>A/A87T  | .            | Het | ALS2_503              | 3.54503E-05 | pathogenic | ./low_pathogenicity/disease/disease/disease/probably_damaging/probably_damaging/                      | ./. | - |
| MT-CYB          | 15200G>A/A152T | rs1603225142 | Het | ALS1_497;<br>ALS2_503 | 5.31934E-05 | pathogenic | Uncertain_significance/low_pathogenicity/disease/disease/disease/probably_damaging/probably_damaging/ | ./. | - |
| MT-CYB          | 15591G>A/R282Q | .            | Het | ALS2_503              | .           | pathogenic | ./high_pathogenicity/disease/disease/disease/probably_damaging/probably_damaging/                     | ./. | - |
| MT-CYB          | 15831T>C/I362T | rs1603225529 | Het | ALS2_503              | 3.54717E-05 | pathogenic | Uncertain_significance/low_pathogenicity/./neutral/neutral/probably_damaging/probably_damaging/       | ./. | - |
| CR - HV1 - TAS2 | 16084G>A/.     | rs1603225661 | Het | ALS2_503              | 0           | -          | ./././././././                                                                                        | ./. | - |
| CR - HV1        | 16265A>G/.     | rs386829295  | Hom | ALS3_536              | 0.00402461  | -          | ./././././././                                                                                        | ./. | - |
| CR              | 16496G>A/.     | .            | Het | ALS2_503              | 1.80584E-05 | -          | ./././././././                                                                                        | ./. | - |

**Table S9. Clusters of highly interconnected genes as identified by MCODE in the network generated with genes containing variants in the WES cohort.** To analyse the physical relationships among genes containing variants, the Cytoscape plug-in Molecular Complex Detection (MCODE, version 2.0.0; <http://apps.cytoscape.org/apps/mcode>) was used to identify the most important sub-modules of the network map. The criteria of MCODE analysis were degree cut-off = 2, MCODE score > 5, Max depth = 100, node score cut-off = 0.2, and k-score = 2. The Biological Networks Gene Ontology tool (BiNGO, version 3.0.3; <http://apps.cytoscape.org/apps/bingo>) was used to analyze and visualize the biological processes of identified sub-modules with an FDR corrected P-value < 0.001.

| Cluster | Score<br>(Density*#Nodes) | Nodes | Edges | Node IDs                                                                                | GO Biological Processes P<0.001*                                                                                                                                                                                                                                                                                                                                          |
|---------|---------------------------|-------|-------|-----------------------------------------------------------------------------------------|---------------------------------------------------------------------------------------------------------------------------------------------------------------------------------------------------------------------------------------------------------------------------------------------------------------------------------------------------------------------------|
| 1       | 9                         | 9     | 34    | MRPL43,<br>MRPL40,<br>TSFM,<br>GADD45GIP1<br>, TUFM,<br>MRPL37,<br>GFM1, MRRF,<br>MRPL3 | translation, cellular macromolecule<br>biosynthetic process, macromolecule<br>biosynthetic process, gene<br>expression, cellular biosynthetic<br>process, biosynthetic process,<br>translational elongation, cellular<br>protein metabolic process, protein<br>metabolic process, mitochondrial<br>translational elongation,                                              |
| 2       | 7                         | 8     | 25    | BCS1L, MT-<br>CO2,<br>NDUFB6, MT-<br>CO1, CYC1,<br>NDUFV1,<br>PMPCA,<br>UQCR10          | electron transport chain, ATP<br>synthesis coupled electron transport,<br>mitochondrial ATP synthesis<br>coupled electron transport,<br>respiratory electron transport chain,<br>cellular respiration, oxidative<br>phosphorylation, generation of<br>precursor metabolites and energy,<br>energy derivation by oxidation of<br>organic compounds, oxidation<br>reduction |

\* False Discovery Rate (FDR) P<0.001 with BiNGO.

**Table S10. Clusters of highly interconnected genes as identified by MCODE in the network generated with genes containing variants in the WGS cohort.** To analyse the physical relationships among genes containing variants, the Cytoscape plug-in Molecular Complex Detection (MCODE, version 2.0.0; <http://apps.cytoscape.org/apps/mcode>) was used to identify the most important sub-modules of the network map. The criteria of MCODE analysis were degree cut-off = 2, MCODE score > 5, Max depth = 100, node score cut-off = 0.2, and k-score = 2. The Biological Networks Gene Ontology tool (BiNGO, version 3.0.3; <http://apps.cytoscape.org/apps/bingo>) was used to analyze and visualize the biological processes of identified sub-modules with an FDR corrected P-value < 0.001.

| Cluster | Score<br>(Density*#Nodes) | Nodes | Edges | Node IDs                                                                                                                                                                                                                        | GO Biological Processes P<0.001*                                                                                                                                                                                                                                                                                                                                                                                                                                                                                                                                                                                                                                                                                                                                                                                          |
|---------|---------------------------|-------|-------|---------------------------------------------------------------------------------------------------------------------------------------------------------------------------------------------------------------------------------|---------------------------------------------------------------------------------------------------------------------------------------------------------------------------------------------------------------------------------------------------------------------------------------------------------------------------------------------------------------------------------------------------------------------------------------------------------------------------------------------------------------------------------------------------------------------------------------------------------------------------------------------------------------------------------------------------------------------------------------------------------------------------------------------------------------------------|
| 1       | 32                        | 32    | 491   | MRPS28, MRPL1, PTCD3, MRPL21, MRPL13, MRPS30, MRPL54, TSFM2, MRPL4, MRPS23, GFM1, TUFM, MRPS34, MRPS11, MRPS21, MRPS7, GADD45GIP1, MRPL44, CHCHD1, MRPL22, MRPF, MRPS6                                                          | translation, cellular macromolecule biosynthetic process, gene expression, macromolecule biosynthetic process, cellular biosynthetic process, biosynthetic process, cellular protein metabolic process, protein metabolic process, cellular macromolecule metabolic process, macromolecule metabolic process, cellular metabolic process, metabolic process, primary metabolic process, DNA damage response, detection of DNA damage, cellular process                                                                                                                                                                                                                                                                                                                                                                    |
| 2       | 24                        | 28    | 323   | NDUFB5, NDUFAF2, NDUFB3, MT-ND1, MT-CO1, SDHC, NDUFA6, MT-CYB, MT-CO2, MT-ND6, NDUFC1, PINK1, MT-ND5, NDUFA7, NDUFS2, PRKACA, COX4I1, NDUFAF4, MT-ND4, ECSIT, UQCRB, MT-ND2, NDUFS5, NDUFA10, TMEM126B, MT-ND4L, NDUFC2, NDUFV2 | ATP synthesis coupled electron transport, mitochondrial ATP synthesis coupled electron transport, respiratory electron transport chain, cellular respiration, mitochondrial electron transport, NADH to ubiquinone, electron transport chain, oxidative phosphorylation, energy derivation by oxidation of organic compounds, generation of precursor metabolites and energy, phosphorylation, oxidation reduction, phosphorus metabolic process, phosphate metabolic process, transport, localization, establishment of localization, cellular metabolic process, response to oxidative stress, metabolic process, NADH dehydrogenase complex assembly, mitochondrial respiratory chain complex I assembly, mitochondrial respiratory chain complex assembly, response to reactive oxygen species, response to stress    |
| 3       | 9                         | 17    | 72    | DLD, OGDHL, SUCLG2, BCKDHB, BCKDHA, MT-ATP6, DLST, PDHX, IDH3A, ATP5F1D, COX10, IDH3B, ATP5PD, DBT, ACO2, NDUFA4L2, SUCLA2                                                                                                      | aerobic respiration, cellular respiration, tricarboxylic acid cycle, generation of precursor metabolites and energy, acetyl-CoA catabolic process, cofactor metabolic process, coenzyme catabolic process, acetyl-CoA metabolic process, energy derivation by oxidation of organic compounds, cofactor catabolic process, coenzyme metabolic process, dicarboxylic acid metabolic process, 2-oxoglutarate metabolic process, carboxylic acid metabolic process, oxoacid metabolic process, organic acid metabolic process, cellular ketone metabolic process, small molecule metabolic process, catabolic process, NADH metabolic process, cellular catabolic process, oxidation reduction, NAD metabolic process, metabolic process, succinyl-CoA metabolic process, nicotinamide nucleotide metabolic process, pyridine |

|   |   |   |    |                                               |                                                                                                                                                                                                                                                                                                                                                                                                                                                                                                                                                                                                                                                                                                                                                                                                                                                                                                                                                                                                                                                                                                                                                     |
|---|---|---|----|-----------------------------------------------|-----------------------------------------------------------------------------------------------------------------------------------------------------------------------------------------------------------------------------------------------------------------------------------------------------------------------------------------------------------------------------------------------------------------------------------------------------------------------------------------------------------------------------------------------------------------------------------------------------------------------------------------------------------------------------------------------------------------------------------------------------------------------------------------------------------------------------------------------------------------------------------------------------------------------------------------------------------------------------------------------------------------------------------------------------------------------------------------------------------------------------------------------------|
|   |   |   |    |                                               | nucleotide metabolic process, isocitrate metabolic process, cellular metabolic process, oxidoreduction coenzyme metabolic process, cellular nitrogen compound metabolic process, nitrogen compound metabolic process, regulation of acetyl-CoA biosynthetic process from pyruvate, branched chain family amino acid catabolic process, regulation of cofactor metabolic process, regulation of coenzyme metabolic process,                                                                                                                                                                                                                                                                                                                                                                                                                                                                                                                                                                                                                                                                                                                          |
| 4 | 9 | 9 | 36 | WARS2,<br>NARS2,<br>IARS2,<br>DARS2,<br>AARS2 | RARS2,<br>LARS2,<br>FARS2,<br>CARS2,<br>tRNA aminoacylation for protein translation, amino acid activation, tRNA aminoacylation, tRNA metabolic process, cellular amino acid metabolic process, ncRNA metabolic process, translation, cellular amine metabolic process, cellular amino acid and derivative metabolic process, amine metabolic process, carboxylic acid metabolic process, oxoacid metabolic process, organic acid metabolic process, cellular ketone metabolic process, RNA metabolic process, cellular macromolecule biosynthetic process, macromolecule biosynthetic process, gene expression, small molecule metabolic process, nucleic acid metabolic process, cellular biosynthetic process, nucleobase, nucleoside, nucleotide and nucleic acid metabolic process, biosynthetic process, cellular nitrogen compound metabolic process, cellular protein metabolic process, nitrogen compound metabolic process, protein metabolic process, aspartyl-tRNA aminoacylation, cellular macromolecule metabolic process, macromolecule metabolic process, cellular metabolic process, primary metabolic process, metabolic process, |

\* False Discovery Rate (FDR)  $P < 0.0001$  with BiNGO.



**Figure S1.** RNA duplex formation predicted by RNAhybrid of hsa-miR-4639-5p and **A)** human PARK7/DJ-1 3'UTR wild type sequence **B)** human PARK7/DJ-1 3'UTR mutated sequence.

**a)**

```
dataset: 1
Target: PARK7/NM_001123377/3'UTR
length: 42
MiRNA: hsa-miR-4639-5p
length: 22

mfe: -18.3 kcal/mol
p-value: 1.000000e+00

Position: 1
target 5' A A AG A 3'
        UAA C GGC AUUUAGCAA
        GUU G UCG UGAAUCGUU
miRNA 3' A A AG GA 5'

plot as png, jpeg or ps (in a new window)
```

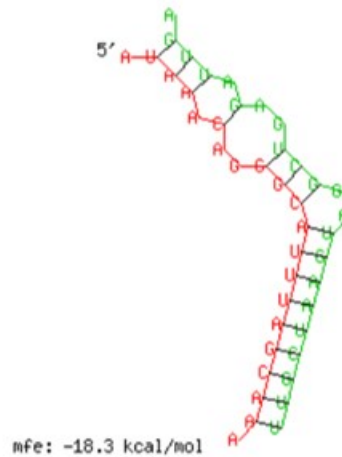

**b)**

```
dataset: 1
Target: PARK7/NM_001123377/3'UTR
length: 42
MiRNA: hsa-miR-4639-5p
length: 22

mfe: -18.4 kcal/mol
p-value: 1.000000e+00

Position: 1
target 5' A A G A 3'
        UAA C CGG C AUUUAGCAA
        GUU G GUC G UGAAUCGUU
miRNA 3' A A A G A 5'

plot as png, jpeg or ps (in a new window)
```

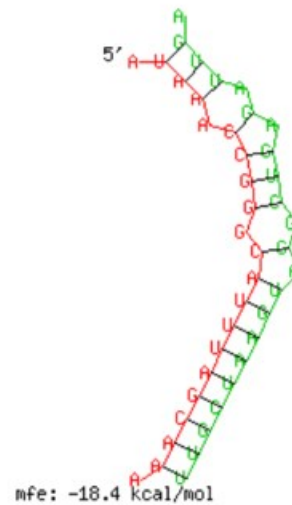

**Figure S2. mtDNA variant counts and proportions in WES dataset .** (a) Number of the Homoplasmic (HOM) and heteroplasmic (HET) variants in ALS and CNTR tissues. (b) Proportion (%) of variants in the Control and Coding regions of the mitochondrial genome in ALS and control subjects. (c) Number of variants in Hyper-variable regions of the Control Region. (d) Proportion (%) of Homoplasmic (HOM) and heteroplasmic (HET) variants in the Control Region in ALS and control subjects. (e) Total number of variants in mitochondrially encoded protein-coding genes observed in ALS and CNTR tissues. (f) Proportion (%) of Homoplasmic (HOM) and heteroplasmic (HET) variants in mitochondrially encoded protein coding genes in ALS and CNTR tissues. (g) Total number of variants in tRNA and rRNA genes in ALS and CNTR samples. (h) Proportion(%) of Homoplasmic (HOM) and heteroplasmic (HET) variants in tRNA and rRNA genes in ALS and CNTR tissues. (i) Proportion (%) of variants with HIGH, MODERATE, LOW and MODIFIER predicted effect in ALS and CNTR samples. (j) Proportion (%) of Heteroplasmic (HET) variants with HIGH, MODERATE, LOW and MODIFIER predicted effect in ALS and CNTR samples. P-values designated with 'P' are derived from the Fisher's exact test, whereas 'p' indicates values obtained from chi-square test.

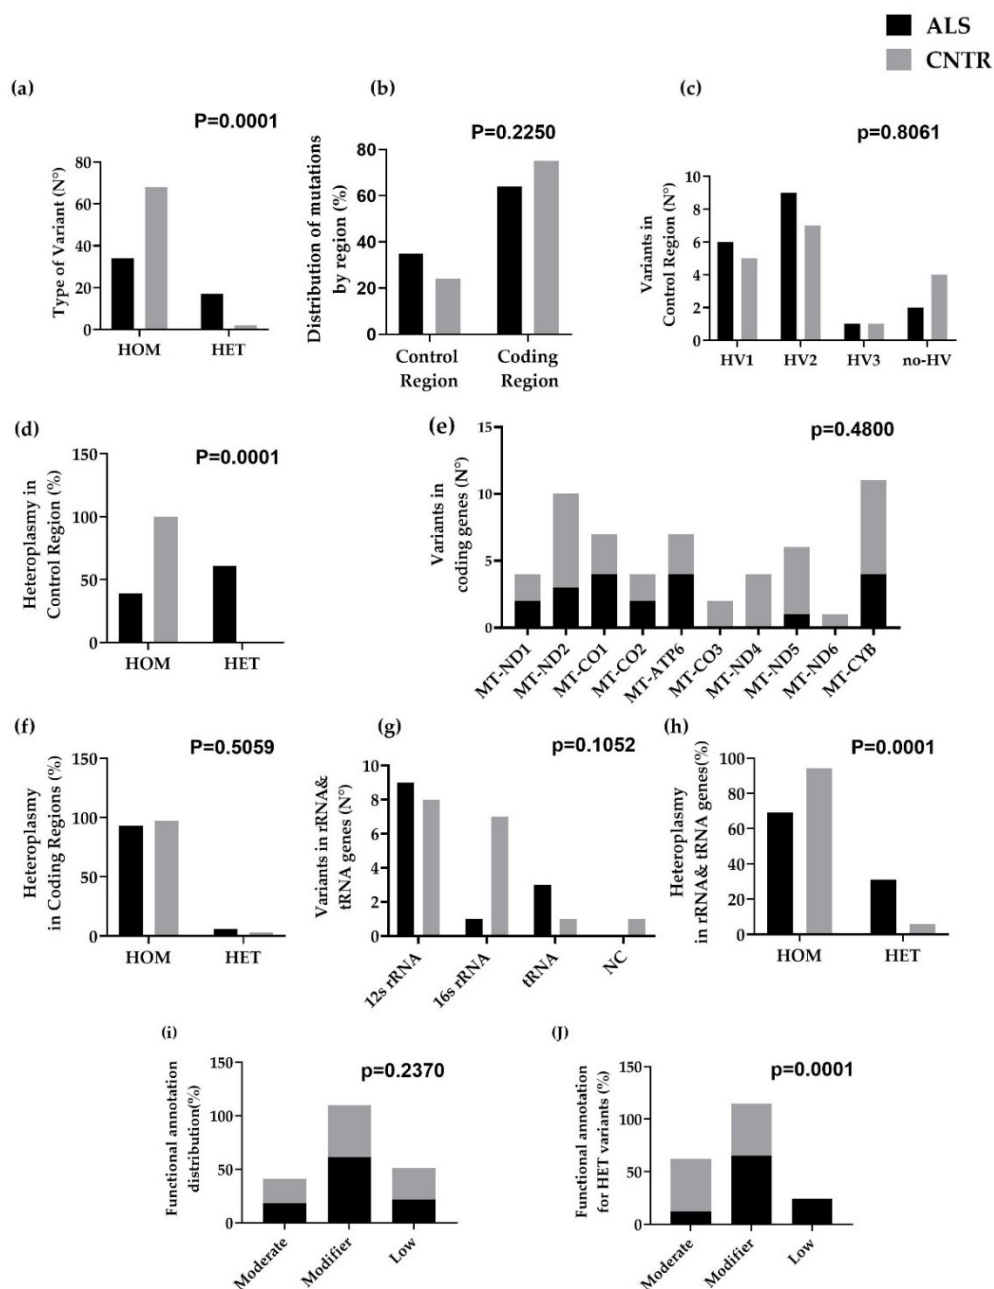

**Figure S3. Structural or thermodynamic differences between wild type Cambridge Reference Sequence (rCRS) and mutated forms in ALS of the secondary structure C. First 42 nt of the ETAS2 region sequence as identified by Sbisà et al., which includes the secondary structure C as described by Pereira et al. Secondary structure and energy information are depicted along with a graphical drawing and Dot bracket representation of a) wild type rCRS b) ALS\_1 m.16298T>C mutated sequence c) ALS\_2 m.16304T>C; m.16311T>C mutated sequence d) ALS\_3 m.16304T>C; m.16311T>C mutated sequence.**

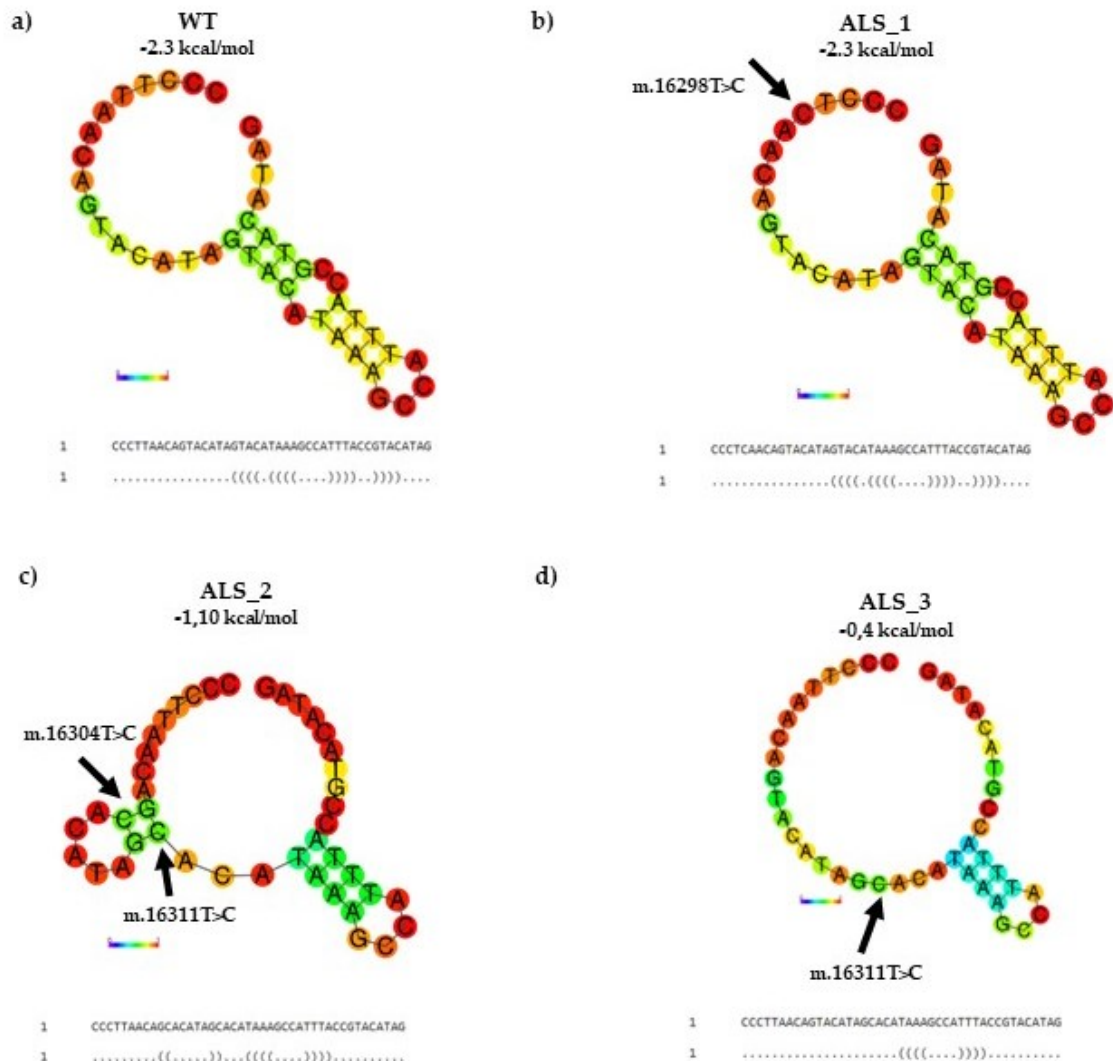



**Figure S5. mtDNA variant counts and proportions in WGS dataset.** (a) Number of homoplasmic (HOM) and heteroplasmic (HET) variants between ALS and CNTR tissues. (b) Proportion (%) of variants in the Control and Coding regions of the mitochondrial genome in ALS and control subjects (c) Number of variants in Hyper-variable regions of the Control Region. (d) Proportion (%) of Homoplasmic (HOM) and heteroplasmic (HET) variants in the Control Region in ALS and control subjects. (e) Total number of variants in mitochondrially encoded protein-coding genes observed in ALS and CNTR tissues. (f) Proportion (%) of Homoplasmic (HOM) and heteroplasmic (HET) variants in mitochondrially encoded protein coding genes in ALS and CNTR tissues. (g) Total number of variants in tRNA and rRNA genes in ALS and CNTR samples. (h) Proportion (%) of Homoplasmic (HOM) and heteroplasmic (HET) variants in tRNA and rRNA genes in ALS and CNTR tissues. (i) Proportion (%) of variants with HIGH, MODERATE, LOW and MODIFIER predicted effect in ALS and CNTR tissues. (j) Proportion (%) of Homoplasmic (HOM) variants with HIGH, MODERATE, LOW and MODIFIER predicted effect in ALS and CNTR samples.

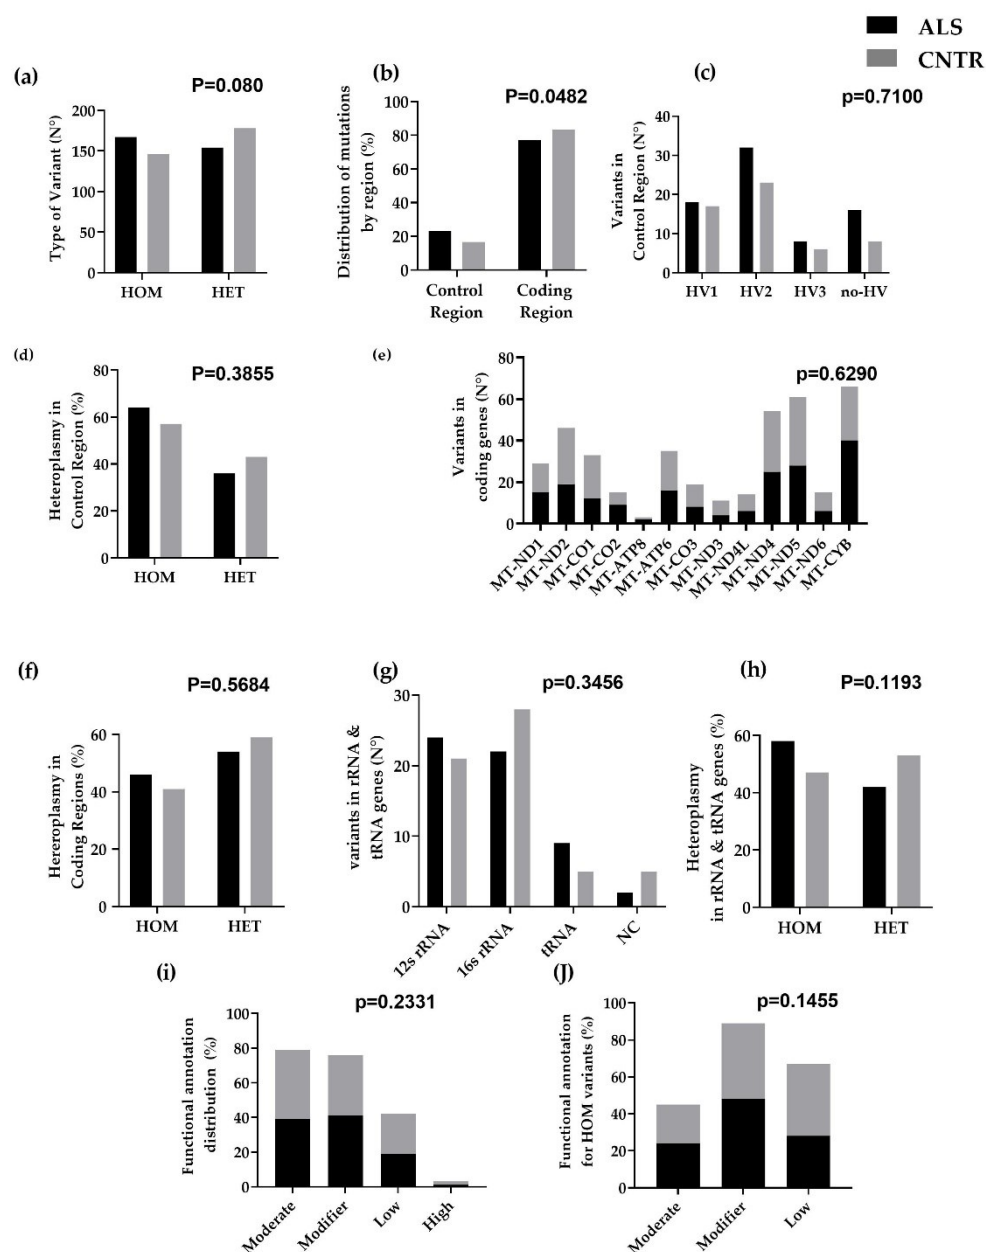

Supplement: s1 [file s1]
